# Supplementary material for: Inverse and dynamic levels of H3K4me3 and H3K27me3 regulate mouse postnatal dentate gyrus development
Source: Research Square preprint supplement (doi:10.21203/rs.3.rs-5502578/v1), 2024-12-06
Supplement: Supplementary file 1 [file 44f04c7c378ad35148b7a4bc.docx]

| **Supplement Table 2 Primers used during the study** | | |
| --- | --- | --- |
| **qRT-PCR primers used during the study** | | |
| Gene | Forward primer | Reverse primer |
| Notch3 | ATGTGCAAATGGAGGTCGGT | GAGTGGCAAGGGTCTTCCAG |
| Hes1 | TCCGTATTGCCAACTGGGAG | CCACCGGGGAGGAGGAATTT |
| Klf4 | GAGAAGACACTGCGTCCAGC | GGGAAGTCGCTTCATGTGAG |
| Prox1 | CGCGTGGGTTTCTTCTCTG | CAAGAATCCCGGGACCGC |
| Gli1 | CACGCATCCCGAGCACC | TCCCAACTGCTTCTTCATCCC |
| Dll4 | TGGGACTCAGCAAGTGTGC | CGCAGGTCAAGGTACTATGCT |
| Dbx2 | AGCTTAGCAACCCTAGTCGAG | ACCTTCTTCACTGATGGCCC |
| Ccnd2 | GGAGATGCGAGCAACCATCG | ACTGTTCGTGTTACTTCATGGAC |
| Cdk6 | CCTCTCCTTCGTGAAGACTGC | CCTCCGCAGCGATTACATAGT |
| Neurod1 | ATAGAGACACTGCGCTTGGC | GCGTCTGTACGAAGGAGACC |
| Cxcl12 | GCGCTTTGTAACTCGCTCC | GGCAGGAAAGCCTAAGCACC |
| GAD2 | CATCGCGTTCACATCAGAGC | GTGGCACTCACCAGGAAAGG |
| Ndrg1 | TTGATCGTTGGGAGTCAGCC | ACGGTAGGAGTTGGCAGGTA |
| Aldh1a3 | CGGAGAGTGCGAACCAGTTA | TCCACTCTTGGATTCGTGCC |
| SOX10 | GTGCACACAAGTCCCTCCTT | GTGCCCATATGCAGCCCTTA |
| Pdgfra | CCTCAGAGAGAATCGGCCC | TGGTGGGAGGTCCCCATAG |

| **ChIP-qRCR primers used during the study** | | |
| --- | --- | --- |
| Gene | Forward primer | Reverse primer |
| Spry4 | GTTCCTCTGACAACAGCCGA | CTTGCTGGTGTTTGGCCTTC |
| Id1 | TTCCAGGGCAACAGCTAAGG | ATAGCCACGACCATTCGACC |
| Igfbp2 | CGTGTAACCTTGGCTGTCCT | GAGTCTGGTATGGCGGTGAG |
| Etv4 | AATGCCCTCAGCTGACACAA | CCTGGCCCACATAGGCTTAG |
| Nptx2 | TGGACTTGTTGGATTCCCGC | TTCGCATGACCTCGGTTTGA |
| Id3 | ATCCAGGTGCGAGAGGGAG | CGAGTTAGCCAAGGGACTCG |
| Gli1 | TCCTGAAAGCAGGCAGTAGC | TCTCCGCGCACACCTTATTT |
| Cdc42 | AGCAGCAGAGGTGACATTCTC | AGCTCCATTCTGTTGCTTACG |
| Notch3 | ATGTTCAAGAACGGCACCCT | AGGCTCTGAACACTCCCTCT |
| Egr2 | CCAATGGTGAACTGGGAGGC | CTCCGAAGAAGACACGCGG |
| Rflna | TAATCTGCAGGTGTCTGGGC | GACCACCAGAGCTGAACACA |
| Lif | CTTGAGAGCTTGGCTTGCAC | GATGACTAGGCGAGAGGCAC |
| Fbln2 | CAGAGCACCGGGTAAGTACA | AGCCAGCGATCAAGAGAACG |
| Cdk6 | TGGGCCGCAGTAGTCAGTTA | CCGTTACTCTCACCCACTCC |
| Shc3 | TTGCCTTGCACTCCTCTCAG | TGGGCAGCTGACATTGAGAA |
| Notch3 | AACAGCATAGCCTTGTACACCAT | AATCCATGACCCAGACAAGCA |
| Hes1 | CTGGAAATGACTGTGAAGCACC | AGTCTGGAAGAAATCACCGC |
| Klf4 | TTGACTTGTTGGGTGAAGCACA | GGTGTTAGCTGAGATTGCAGTG |
| Prox1 | TTCCCAAGAAGCTAGGCAGG | TCCAGCTGAGCAAGTTGTCG |
| Gli1 | TCCTGAAAGCAGGCAGTAGC | TCTCCGCGCACACCTTATTT |
| Dll4 | TTAAACAGGCTGCTGCGAGG | CCTGTGGCCGAGAAGTTAGA |
| Dbx2 | CCTGAAAGTCAGTCACCAGCA | CAAGGCAATTTGGTGGTTTGC |
| Ccnd2 | TGGAAGCTCCGAAAGTCTACTTCTT | ATTGTCGGGAATGGTAGAATAGGA |
| Cdk6 | TGGGCCGCAGTAGTCAGTTA | CCGTTACTCTCACCCACTCC |
| Neurod1 | GCGTCTGTACGAAGGAGACC | ATAGAGACACTGCGCTTGGC |
| Cxcl12 | ATAGAGACACTGCGCTTGGC | GGATTGCACTCACCGTCACT |
| GAD2 | GCCTAGGTTGGACGAATCCC | GCTGGACAAAGACACGGAAC |
| NDRG1 | AGAGGGAGACGAAGATGGGT | CTACGCACGCACGGACATA |
| Aldh1a3 | CCCGTTGGTGGTAGCCATAA | CATAAAGGCGCGGAGCTGTC |
| SOX10 | GTCCTCGTGAAGAGCCCAAC | CACCTAGGGTCTGGCATGTG |
| Pdgfra | CTGCCCTGGGATGATGGATG | TGCAGGATACTGAGCGTTGG |
