# Supplementary material for: Inverse and dynamic levels of H3K4me3 and H3K27me3 regulate mouse postnatal dentate gyrus development
Source: Research Square preprint supplement (doi:10.21203/rs.3.rs-5502578/v1), 2024-12-06
Supplement: Supplementary file 2 [file 8e358cc0ef33c2923498ab6a.docx]

| Supplement Table I. Antibodies used during the study | | | |
| --- | --- | --- | --- |
| Antigen | **Source and host species** | **Concentration** | **Catalog No.** |
| Anti-H3K4me3 | Millipore, rabbit monoclonal antibody | 1:500 (IF)  1:1000 (WB) | 04-745 |
| Anti-H3K27me3 | Diagenode, mouse monoclonal antibody | 1:500 (IF)  1:1000 (WB) | C15200181-50 |
| Anti-SOX2 | Abcam, rabbit polyclonal antibody | 1:200 | ab97959 |
| Anti-SOX2 | Abcam, mouse monoclonal antibody | 1:200 | ab79351 |
| Anti-beta III Tubulin (Tuj1) | Abcam, mouse monoclonal antibody | 1:200 | ab231083 |
| Anti-MAP2 | Abcam, rabbit monoclonal antibody | 1:1000 | ab183830 |
| Anti-GAD65 + GAD67 | Abcam, rabbit monoclonal antibody | 1:200 | ab183999 |
| Anti-CaMKII | Abcam, rabbit monoclonal antibody | 1:200 | ab52476 |
| Anti-Nestin | Millipore, mouse monoclonal antibody | 1:200 | MAB353 |
| Anti-GFAP | Abcam, rabbit polyclonal antibody | 1:1000 | ab7260 |
| Anti-NG2 | Millipore, rabbit polyclonal antibody | 1:200 | AB5320 |
| Anti-KDM5B | Abcam, rabbit monoclonal antibody | 1:1000 | ab181089 |
| Anti-KDM6A | Abcam, rabbit monoclonal antibody | 1:1000 | ab300513 |
| Anti-Histone H3 | Abcam, rabbit monoclonal antibody | 1:1000 | ab176842 |
| Anti-β-actin | Sigma-Aldrich, mouse monoclonal antibody | 1:5000 | A1978 |
| Anti-BrdU | Abcam, rat monoclonal antibody | 1:200 | ab6326 |
| Anti-Ki-67 | Invitrogen, rat monoclonal antibody | 1:1000 | 14-5698-80 |
| Anti-HES1 | Invitrogen, rat monoclonal antibody | 1:2000 | MA5-32258 |
| Anti-Ascl1/MASH1 | Abcam, rabbit monoclonal antibody | 1:500 | ab213151 |
| Anti-DCX | Abcam, rabbit polyclonal antibody | 1:200 | ab18723 |
| Anti-NeuN | Abcam, rabbit polyclonal antibody | 1:400 | ab104225 |
| Anti H3K27me3 | Diagenode, rabbit polyclonal antibody | 1:400 (ChIP) | C15410195 |
| Anti-H3K4me3 | Cell Signaling Technology, rabbit monoclonal antibody | 1:50 (ChIP) | 9751 |
| Anti-GLI1 | Cell Signaling Technology, rabbit polyclonal antibody | 1:1000 | 2534 |
| Anti-NeuroD1 | Abcam, mouse monoclonal antibody | 1:1000 | ab109224 |
| Anti-CDK6 | Invitrogen, rabbit monoclonal antibody | 1:1500 | PA5-85945 |
| Anti-Mouse IgG (H+L) secondary antibody, Alexa Fluor™ 488 | Invitrogen, goat polyclonal antibody | 1:500 | A-11001 |
| Anti-Mouse IgG (H+L) secondary antibody, Alexa Fluor™ 594 | Invitrogen, goat polyclonal antibody | 1:500 | A-11005 |
| Anti-Rabbit IgG (H+L) secondary antibody, Alexa Fluor™ 488 | Invitrogen, goat polyclonal antibody | 1:500 | A-11008 |
| Anti-Rabbit IgG (H+L) secondary antibody, Alexa Fluor™ 594 | Invitrogen, goat polyclonal antibody | 1:500 | A-11012 |
| HRP-conjugated anti-rabbit IgG | Sigma-Aldrich, goat polyclonal antibody | 1:10000 | AP307P |
| HRP-conjugated anti-Mouse IgG | Sigma-Aldrich, goat polyclonal antibody | 1:10000 | AP130P |
