# Supplementary material for: Inverse and dynamic levels of H3K4me3 and H3K27me3 regulate mouse postnatal dentate gyrus development
Source: Research Square preprint supplement (doi:10.21203/rs.3.rs-5502578/v1), 2024-12-06
Supplement: Supplementary file 3 [file 9db4d8ca18d04986b0bc5cdc.xlsx]

## Sheet: venn956
id	ND3d_1_tpm	ND3d_2_tpm	ND3d_3_tpm	NSCs_1_tpm	NSCs_2_tpm	NSCs_3_tpm	ND3d_1_count	ND3d_2_count	ND3d_3_count	NSCs_1_count	NSCs_2_count	NSCs_3_count	Symbol	Description	KEGG_A_class	KEGG_B_class	Pathway	K_ID	GO Component	GO Function	GO Process	TF_family
ENSMUSG00000000126	4.702	6.092	5.064	0.613	0.474	0.417	108	131	119	14	12	9	Wnt9a	wingless-type MMTV integration site family, member 9A [Source:MGI Symbol;Acc:MGI:2446084]	Human Diseases;Human Diseases;Human Diseases;Human Diseases;Human Diseases;Human Diseases;Environmental Information Processing;Human Diseases;Environmental Information Processing;Environmental Information Processing;Human Diseases;Human Diseases;Cellular Processes;Organismal Systems;Human Diseases	Cancer: overview;Neurodegenerative disease;Neurodegenerative disease;Infectious disease: viral;Cancer: overview;Cancer: specific types;Signal transduction;Endocrine and metabolic disease;Signal transduction;Signal transduction;Cancer: specific types;Cancer: specific types;Cellular community - eukaryotes;Endocrine system;Cancer: specific types	ko05200//Pathways in cancer;ko05022//Pathways of neurodegeneration - multiple diseases;ko05010//Alzheimer disease;ko05165//Human papillomavirus infection;ko05205//Proteoglycans in cancer;ko05225//Hepatocellular carcinoma;ko04310//Wnt signaling pathway;ko04934//Cushing syndrome;ko04150//mTOR signaling pathway;ko04390//Hippo signaling pathway;ko05226//Gastric cancer;ko05224//Breast cancer;ko04550//…	K01064;K01064;K01064;K01064;K01064;K01064;K01064;K01064;K01064;K01064;K01064;K01064;K01064;K01064;K01064	GO:0005576//extracellular region;GO:0005615//extracellular space	GO:0005102//signaling receptor binding;GO:0005109//frizzled binding;GO:0005125//cytokine activity;GO:0005515//protein binding;GO:0048018//receptor ligand activity	GO:0002062//chondrocyte differentiation;GO:0007224//smoothened signaling pathway;GO:0007275//multicellular organism development;GO:0008285//negative regulation of cell population proliferation;GO:0009887//animal organ morphogenesis;GO:0016055//Wnt signaling pathway;GO:0030182//neuron differentiation;GO:0030855//epithelial cell differentiation;GO:0030858//positive regulation of epithelial cell dif…	--
ENSMUSG00000000184	49.934	47.959	48.789	359.693	353.032	352.68	2071	1839	2095	15002	16385	13950	Ccnd2	cyclin D2 [Source:MGI Symbol;Acc:MGI:88314]	Human Diseases;Environmental Information Processing;Human Diseases;Human Diseases;Human Diseases;Human Diseases;Human Diseases;Cellular Processes;Environmental Information Processing;Cellular Processes;Environmental Information Processing;Human Diseases;Environmental Information Processing;Human Diseases;Environmental Information Processing;Cellular Processes;Organismal Systems;Cellular Processes…	Cancer: overview;Signal transduction;Infectious disease: viral;Infectious disease: viral;Cancer: overview;Infectious disease: viral;Cancer: overview;Cellular community - eukaryotes;Signal transduction;Cell growth and death;Signal transduction;Cancer: overview;Signal transduction;Infectious disease: viral;Signal transduction;Cell growth and death;Endocrine system;Cell growth and death;Signal trans…	ko05200//Pathways in cancer;ko04151//PI3K-Akt signaling pathway;ko05165//Human papillomavirus infection;ko05169//Epstein-Barr virus infection;ko05202//Transcriptional misregulation in cancer;ko05166//Human T-cell leukemia virus 1 infection;ko05203//Viral carcinogenesis;ko04510//Focal adhesion;ko04630//JAK-STAT signaling pathway;ko04218//Cellular senescence;ko04310//Wnt signaling pathway;ko05206//…	K10151;K10151;K10151;K10151;K10151;K10151;K10151;K10151;K10151;K10151;K10151;K10151;K10151;K10151;K10151;K10151;K10151;K10151;K10151	GO:0000307//cyclin-dependent protein kinase holoenzyme complex;GO:0000785//chromatin;GO:0005634//nucleus;GO:0005654//nucleoplasm;GO:0005730//nucleolus;GO:0005737//cytoplasm;GO:0005829//cytosol;GO:0016020//membrane;GO:0031965//nuclear membrane;GO:0097129//cyclin D2-CDK4 complex	GO:0005515//protein binding;GO:0016538//cyclin-dependent protein serine/threonine kinase regulator activity;GO:0019901//protein kinase binding	GO:0000079//regulation of cyclin-dependent protein serine/threonine kinase activity;GO:0000082//G1/S transition of mitotic cell cycle;GO:0001934//positive regulation of protein phosphorylation;GO:0007049//cell cycle;GO:0007616//long-term memory;GO:0008284//positive regulation of cell population proliferation;GO:0008344//adult locomotory behavior;GO:0043066//negative regulation of apoptotic proces…	--
ENSMUSG00000000247	19.076	16.327	16.771	35.831	37.855	37.021	343	293	326	695	783	666	Lhx2	LIM homeobox protein 2 [Source:MGI Symbol;Acc:MGI:96785]	-	-	-	-	GO:0005634//nucleus;GO:0005654//nucleoplasm	GO:0000977//RNA polymerase II transcription regulatory region sequence-specific DNA binding;GO:0000978//RNA polymerase II cis-regulatory region sequence-specific DNA binding;GO:0000981//DNA-binding transcription factor activity, RNA polymerase II-specific;GO:0001228//DNA-binding transcription activator activity, RNA polymerase II-specific;GO:0003677//DNA binding;GO:0003682//chromatin binding;GO:0…	GO:0001843//neural tube closure;GO:0001942//hair follicle development;GO:0006355//regulation of transcription, DNA-templated;GO:0006357//regulation of transcription by RNA polymerase II;GO:0007399//nervous system development;GO:0007411//axon guidance;GO:0007420//brain development;GO:0007498//mesoderm development;GO:0009953//dorsal/ventral pattern formation;GO:0021537//telencephalon development;GO…	Homeobox
ENSMUSG00000000266	19.915	17.358	19.17	44.678	42.941	42.526	789	666	722	1602	1791	1499	Mid2	midline 2 [Source:MGI Symbol;Acc:MGI:1344333]	-	-	-	-	GO:0005737//cytoplasm;GO:0005856//cytoskeleton;GO:0005874//microtubule	GO:0003713//transcription coactivator activity;GO:0005515//protein binding;GO:0008017//microtubule binding;GO:0008270//zinc ion binding;GO:0019899//enzyme binding;GO:0042803//protein homodimerization activity;GO:0046872//metal ion binding;GO:0051219//phosphoprotein binding	GO:0010508//positive regulation of autophagy;GO:0032897//negative regulation of viral transcription;GO:0035372//protein localization to microtubule;GO:0043123//positive regulation of I-kappaB kinase/NF-kappaB signaling;GO:0044790//negative regulation by host of viral release from host cell;GO:0045087//innate immune response;GO:0045893//positive regulation of transcription, DNA-templated;GO:004659…	--
ENSMUSG00000000275	0.775	1.435	1.01	3.483	3.305	3.772	30	52	40	134	141	137	Trim25	tripartite motif-containing 25 [Source:MGI Symbol;Acc:MGI:102749]	Environmental Information Processing;Human Diseases;Organismal Systems	Signal transduction;Infectious disease: viral;Immune system	ko04064//NF-kappa B signaling pathway;ko05164//Influenza A;ko04622//RIG-I-like receptor signaling pathway	K10652;K10652;K10652	GO:0005634//nucleus;GO:0005654//nucleoplasm;GO:0005737//cytoplasm;GO:0005829//cytosol;GO:0010494//cytoplasmic stress granule;GO:0016604//nuclear body	GO:0003713//transcription coactivator activity;GO:0004842//ubiquitin-protein transferase activity;GO:0005515//protein binding;GO:0016740//transferase activity;GO:0016874//ligase activity;GO:0039552//RIG-I binding;GO:0046872//metal ion binding;GO:0061630//ubiquitin protein ligase activity	GO:0002376//immune system process;GO:0006511//ubiquitin-dependent protein catabolic process;GO:0006513//protein monoubiquitination;GO:0016567//protein ubiquitination;GO:0019076//viral release from host cell;GO:0030433//ubiquitin-dependent ERAD pathway;GO:0032880//regulation of protein localization;GO:0033280//response to vitamin D;GO:0043123//positive regulation of I-kappaB kinase/NF-kappaB signa…	--
ENSMUSG00000000489	0.603	0.734	0.719	0	0.045	0	7	14	15	0	1	0	Pdgfb	platelet derived growth factor, B polypeptide [Source:MGI Symbol;Acc:MGI:97528]	Human Diseases;Environmental Information Processing;Environmental Information Processing;Environmental Information Processing;Environmental Information Processing;Environmental Information Processing;Cellular Processes;Human Diseases;Environmental Information Processing;Cellular Processes;Environmental Information Processing;Human Diseases;Human Diseases;Human Diseases;Human Diseases;Cellular Pro…	Cancer: overview;Signal transduction;Signal transduction;Signal transduction;Signal transduction;Signal transduction;Cell motility;Infectious disease: viral;Signal transduction;Cellular community - eukaryotes;Signal transduction;Cancer: overview;Cardiovascular disease;Cancer: specific types;Cancer: overview;Cellular community - eukaryotes;Drug resistance: antineoplastic;Cancer: specific types;Can…	ko05200//Pathways in cancer;ko04151//PI3K-Akt signaling pathway;ko04020//Calcium signaling pathway;ko04010//MAPK signaling pathway;ko04072//Phospholipase D signaling pathway;ko04014//Ras signaling pathway;ko04810//Regulation of actin cytoskeleton;ko05167//Kaposi sarcoma-associated herpesvirus infection;ko04015//Rap1 signaling pathway;ko04510//Focal adhesion;ko04630//JAK-STAT signaling pathway;ko0…	K17386;K17386;K17386;K17386;K17386;K17386;K17386;K17386;K17386;K17386;K17386;K17386;K17386;K17386;K17386;K17386;K17386;K17386;K17386;K17386	GO:0005576//extracellular region;GO:0009986//cell surface;GO:0016020//membrane;GO:1990265//platelet-derived growth factor complex	GO:0005161//platelet-derived growth factor receptor binding;GO:0005518//collagen binding;GO:0008083//growth factor activity;GO:0016176//superoxide-generating NADPH oxidase activator activity;GO:0042056//chemoattractant activity;GO:0042802//identical protein binding;GO:0042803//protein homodimerization activity;GO:0046982//protein heterodimerization activity;GO:0048407//platelet-derived growth fac…	GO:0001938//positive regulation of endothelial cell proliferation;GO:0002548//monocyte chemotaxis;GO:0006468//protein phosphorylation;GO:0007165//signal transduction;GO:0008284//positive regulation of cell population proliferation;GO:0009611//response to wounding;GO:0010512//negative regulation of phosphatidylinositol biosynthetic process;GO:0010544//negative regulation of platelet activation;GO:…	--
ENSMUSG00000000555	3.264	3.204	3.287	17.474	17.852	19.317	99	91	102	527	597	550	Itga5	integrin alpha 5 (fibronectin receptor alpha) [Source:MGI Symbol;Acc:MGI:96604]	Human Diseases;Environmental Information Processing;Human Diseases;Cellular Processes;Human Diseases;Human Diseases;Cellular Processes;Organismal Systems;Human Diseases;Human Diseases;Cellular Processes;Human Diseases;Human Diseases;Environmental Information Processing;Human Diseases;Human Diseases;Human Diseases	Infectious disease: viral;Signal transduction;Infectious disease: viral;Transport and catabolism;Infectious disease: bacterial;Infectious disease: bacterial;Cell motility;Immune system;Cardiovascular disease;Cancer: overview;Cellular community - eukaryotes;Cancer: overview;Cardiovascular disease;Signaling molecules and interaction;Infectious disease: bacterial;Cardiovascular disease;Infectious di…	ko05168//Herpes simplex virus 1 infection;ko04151//PI3K-Akt signaling pathway;ko05165//Human papillomavirus infection;ko04145//Phagosome;ko05135//Yersinia infection;ko05131//Shigellosis;ko04810//Regulation of actin cytoskeleton;ko04640//Hematopoietic cell lineage;ko05414//Dilated cardiomyopathy;ko05205//Proteoglycans in cancer;ko04510//Focal adhesion;ko05206//MicroRNAs in cancer;ko05410//Hypertro…	K06484;K06484;K06484;K06484;K06484;K06484;K06484;K06484;K06484;K06484;K06484;K06484;K06484;K06484;K06484;K06484;K06484	GO:0005737//cytoplasm;GO:0005783//endoplasmic reticulum;GO:0005794//Golgi apparatus;GO:0005886//plasma membrane;GO:0005911//cell-cell junction;GO:0005925//focal adhesion;GO:0008305//integrin complex;GO:0009897//external side of plasma membrane;GO:0009986//cell surface;GO:0016020//membrane;GO:0031410//cytoplasmic vesicle;GO:0032587//ruffle membrane;GO:0034674//integrin alpha5-beta1 complex;GO:0045…	GO:0005154//epidermal growth factor receptor binding;GO:0005178//integrin binding;GO:0005515//protein binding;GO:0046872//metal ion binding;GO:0050839//cell adhesion molecule binding	GO:0001525//angiogenesis;GO:0007044//cell-substrate junction assembly;GO:0007155//cell adhesion;GO:0007157//heterophilic cell-cell adhesion via plasma membrane cell adhesion molecules;GO:0007159//leukocyte cell-cell adhesion;GO:0007160//cell-matrix adhesion;GO:0007229//integrin-mediated signaling pathway;GO:0007565//female pregnancy;GO:0007613//memory;GO:0010811//positive regulation of cell-subst…	--
ENSMUSG00000000627	0.813	0.831	1.175	0.178	0.128	0.151	23	22	34	5	4	4	Sema4f	sema domain, immunoglobulin domain (Ig), TM domain, and short cytoplasmic domain [Source:MGI Symbol;Acc:MGI:1340055]	Organismal Systems	Development and regeneration	ko04360//Axon guidance	K06521	GO:0005615//extracellular space;GO:0005783//endoplasmic reticulum;GO:0005886//plasma membrane;GO:0014069//postsynaptic density;GO:0016020//membrane;GO:0016021//integral component of membrane;GO:0030425//dendrite;GO:0042995//cell projection;GO:0043204//perikaryon;GO:0045202//synapse;GO:0045211//postsynaptic membrane;GO:0098839//postsynaptic density membrane;GO:0098978//glutamatergic synapse	GO:0005515//protein binding;GO:0030215//semaphorin receptor binding;GO:0045499//chemorepellent activity	GO:0001755//neural crest cell migration;GO:0007399//nervous system development;GO:0007411//axon guidance;GO:0030154//cell differentiation;GO:0030335//positive regulation of cell migration;GO:0030517//negative regulation of axon extension;GO:0031290//retinal ganglion cell axon guidance;GO:0048675//axon extension;GO:0048843//negative regulation of axon extension involved in axon guidance;GO:0050919…	--
ENSMUSG00000000686	0.651	1.043	0.265	2.347	2.314	2.563	12	18	5	43	47	33	Abhd15	abhydrolase domain containing 15 [Source:MGI Symbol;Acc:MGI:1914727]	-	-	-	-	GO:0005576//extracellular region	GO:0016787//hydrolase activity;GO:0034338//short-chain carboxylesterase activity;GO:0047372//acylglycerol lipase activity	GO:0044255//cellular lipid metabolic process	--
ENSMUSG00000000706	0.084	0	0.124	0.34	0.421	0.386	2	0	3	8	11	6	Btn1a1	butyrophilin, subfamily 1, member A1 [Source:MGI Symbol;Acc:MGI:103118]	-	-	-	-	GO:0009897//external side of plasma membrane;GO:0016020//membrane	GO:0005102//signaling receptor binding;GO:0005515//protein binding	GO:0001817//regulation of cytokine production;GO:0001818//negative regulation of cytokine production;GO:0046007//negative regulation of activated T cell proliferation;GO:0050852//T cell receptor signaling pathway	--
ENSMUSG00000001240	6.368	2.882	4.121	10.867	10.733	7.839	30	22	33	84.44	76	60	Ramp2	receptor (calcitonin) activity modifying protein 2 [Source:MGI Symbol;Acc:MGI:1859650]	Organismal Systems	Circulatory system	ko04270//Vascular smooth muscle contraction	K08448	GO:0005737//cytoplasm;GO:0005886//plasma membrane;GO:0009986//cell surface;GO:0016020//membrane;GO:0016021//integral component of membrane;GO:0043235//receptor complex;GO:0150057//amylin receptor complex 2;GO:1903143//adrenomedullin receptor complex	GO:0001605//adrenomedullin receptor activity;GO:0015026//coreceptor activity;GO:0097643//amylin receptor activity;GO:1990409//adrenomedullin binding	GO:0001525//angiogenesis;GO:0001570//vasculogenesis;GO:0002040//sprouting angiogenesis;GO:0006816//calcium ion transport;GO:0006886//intracellular protein transport;GO:0007186//G protein-coupled receptor signaling pathway;GO:0007189//adenylate cyclase-activating G protein-coupled receptor signaling pathway;GO:0007507//heart development;GO:0008217//regulation of blood pressure;GO:0008277//regulati…	--
ENSMUSG00000001281	4.038	5.832	3.684	0.379	0.391	0.287	75	84	70	7	8	5	Itgb7	integrin beta 7 [Source:MGI Symbol;Acc:MGI:96616]	Environmental Information Processing;Human Diseases;Human Diseases;Cellular Processes;Human Diseases;Cellular Processes;Environmental Information Processing;Organismal Systems;Human Diseases;Environmental Information Processing;Human Diseases	Signal transduction;Infectious disease: viral;Cancer: overview;Cell motility;Cardiovascular disease;Cellular community - eukaryotes;Signaling molecules and interaction;Immune system;Cardiovascular disease;Signaling molecules and interaction;Cardiovascular disease	ko04151//PI3K-Akt signaling pathway;ko05165//Human papillomavirus infection;ko05202//Transcriptional misregulation in cancer;ko04810//Regulation of actin cytoskeleton;ko05414//Dilated cardiomyopathy;ko04510//Focal adhesion;ko04514//Cell adhesion molecules;ko04672//Intestinal immune network for IgA production;ko05410//Hypertrophic cardiomyopathy;ko04512//ECM-receptor interaction;ko05412//Arrhythmo…	K06590;K06590;K06590;K06590;K06590;K06590;K06590;K06590;K06590;K06590;K06590	GO:0005925//focal adhesion;GO:0008305//integrin complex;GO:0009986//cell surface;GO:0016020//membrane;GO:0034669//integrin alpha4-beta7 complex;GO:0043235//receptor complex	GO:0005178//integrin binding;GO:0038023//signaling receptor activity;GO:0050839//cell adhesion molecule binding	GO:0003366//cell-matrix adhesion involved in ameboidal cell migration;GO:0007155//cell adhesion;GO:0007160//cell-matrix adhesion;GO:0007229//integrin-mediated signaling pathway;GO:0016477//cell migration;GO:0033627//cell adhesion mediated by integrin;GO:0034113//heterotypic cell-cell adhesion;GO:0034446//substrate adhesion-dependent cell spreading;GO:0043113//receptor clustering;GO:0050900//leuko…	--
ENSMUSG00000001334	22.274	22.618	23.661	7.415	7.541	6.963	426	405	463	141	159	125	Fndc5	fibronectin type III domain containing 5 [Source:MGI Symbol;Acc:MGI:1917614]	-	-	-	-	GO:0005576//extracellular region;GO:0005777//peroxisome;GO:0005778//peroxisomal membrane;GO:0005783//endoplasmic reticulum;GO:0005886//plasma membrane;GO:0016020//membrane	GO:0005179//hormone activity;GO:0005515//protein binding	GO:0007165//signal transduction;GO:0014850//response to muscle activity;GO:0090336//positive regulation of brown fat cell differentiation	--
ENSMUSG00000001435	1.324	0.853	1.395	4.426	6.493	4.286	32	28	36	154	185	141	Col18a1	collagen, type XVIII, alpha 1 [Source:MGI Symbol;Acc:MGI:88451]	Organismal Systems	Digestive system	ko04974//Protein digestion and absorption	K06823	GO:0005576//extracellular region;GO:0005581//collagen trimer;GO:0005604//basement membrane;GO:0005615//extracellular space;GO:0031012//extracellular matrix;GO:0062023//collagen-containing extracellular matrix	GO:0005201//extracellular matrix structural constituent;GO:0005515//protein binding;GO:0030020//extracellular matrix structural constituent conferring tensile strength;GO:0042802//identical protein binding;GO:0046872//metal ion binding	GO:0001525//angiogenesis;GO:0001886//endothelial cell morphogenesis;GO:0007155//cell adhesion;GO:0030198//extracellular matrix organization;GO:0043534//blood vessel endothelial cell migration;GO:0043536//positive regulation of blood vessel endothelial cell migration;GO:0072577//endothelial cell apoptotic process;GO:0101023//vascular endothelial cell proliferation;GO:1905564//positive regulation o…	--
ENSMUSG00000001473	16.929	19.135	18.794	43.142	46.511	44.298	206	218	234	522	624	506	Tubb6	tubulin, beta 6 class V [Source:MGI Symbol;Acc:MGI:1915201]	Human Diseases;Human Diseases;Human Diseases;Human Diseases;Human Diseases;Cellular Processes;Human Diseases;Human Diseases;Human Diseases;Cellular Processes	Neurodegenerative disease;Neurodegenerative disease;Neurodegenerative disease;Infectious disease: bacterial;Neurodegenerative disease;Transport and catabolism;Neurodegenerative disease;Neurodegenerative disease;Infectious disease: bacterial;Cellular community - eukaryotes	ko05022//Pathways of neurodegeneration - multiple diseases;ko05010//Alzheimer disease;ko05014//Amyotrophic lateral sclerosis;ko05130//Pathogenic Escherichia coli infection;ko05016//Huntington disease;ko04145//Phagosome;ko05012//Parkinson disease;ko05020//Prion disease;ko05132//Salmonella infection;ko04540//Gap junction	K07375;K07375;K07375;K07375;K07375;K07375;K07375;K07375;K07375;K07375	GO:0005737//cytoplasm;GO:0005856//cytoskeleton;GO:0005874//microtubule;GO:0015630//microtubule cytoskeleton;GO:0045171//intercellular bridge;GO:0072686//mitotic spindle	GO:0000166//nucleotide binding;GO:0003924//GTPase activity;GO:0005200//structural constituent of cytoskeleton;GO:0005525//GTP binding;GO:0046872//metal ion binding	GO:0000226//microtubule cytoskeleton organization;GO:0000278//mitotic cell cycle;GO:0007010//cytoskeleton organization;GO:0007017//microtubule-based process	--
ENSMUSG00000001496	0.193	0.206	0.189	0.713	0.701	1.098	3	3	3	11	12	16	Nkx2-1	NK2 homeobox 1 [Source:MGI Symbol;Acc:MGI:108067]	-	-	-	-	GO:0005634//nucleus;GO:0005654//nucleoplasm;GO:0005667//transcription regulator complex	GO:0000976//transcription cis-regulatory region binding;GO:0000977//RNA polymerase II transcription regulatory region sequence-specific DNA binding;GO:0000978//RNA polymerase II cis-regulatory region sequence-specific DNA binding;GO:0000981//DNA-binding transcription factor activity, RNA polymerase II-specific;GO:0001046//core promoter sequence-specific DNA binding;GO:0001161//intronic transcript…	GO:0000122//negative regulation of transcription by RNA polymerase II;GO:0001764//neuron migration;GO:0002016//regulation of blood volume by renin-angiotensin;GO:0006355//regulation of transcription, DNA-templated;GO:0006357//regulation of transcription by RNA polymerase II;GO:0006644//phospholipid metabolic process;GO:0007389//pattern specification process;GO:0007411//axon guidance;GO:0007420//b…	Homeobox
ENSMUSG00000001507	3.923	4.805	2.701	0.958	0.512	0.285	132	113	93	28	19	9	Itga3	integrin alpha 3 [Source:MGI Symbol;Acc:MGI:96602]	Human Diseases;Environmental Information Processing;Human Diseases;Cellular Processes;Organismal Systems;Human Diseases;Cellular Processes;Human Diseases;Human Diseases;Environmental Information Processing;Human Diseases	Cancer: overview;Signal transduction;Infectious disease: viral;Cell motility;Immune system;Cardiovascular disease;Cellular community - eukaryotes;Cancer: specific types;Cardiovascular disease;Signaling molecules and interaction;Cardiovascular disease	ko05200//Pathways in cancer;ko04151//PI3K-Akt signaling pathway;ko05165//Human papillomavirus infection;ko04810//Regulation of actin cytoskeleton;ko04640//Hematopoietic cell lineage;ko05414//Dilated cardiomyopathy;ko04510//Focal adhesion;ko05222//Small cell lung cancer;ko05410//Hypertrophic cardiomyopathy;ko04512//ECM-receptor interaction;ko05412//Arrhythmogenic right ventricular cardiomyopathy	K06482;K06482;K06482;K06482;K06482;K06482;K06482;K06482;K06482;K06482;K06482	GO:0005886//plasma membrane;GO:0008305//integrin complex;GO:0009897//external side of plasma membrane;GO:0009986//cell surface;GO:0016020//membrane;GO:0016323//basolateral plasma membrane;GO:0030426//growth cone;GO:0031527//filopodium membrane;GO:0031594//neuromuscular junction;GO:0034667//integrin alpha3-beta1 complex;GO:0042995//cell projection;GO:0043235//receptor complex;GO:0045202//synapse;G…	GO:0001968//fibronectin binding;GO:0002020//protease binding;GO:0005178//integrin binding;GO:0005515//protein binding;GO:0005518//collagen binding;GO:0019904//protein domain specific binding;GO:0043236//laminin binding;GO:0044877//protein-containing complex binding;GO:0046982//protein heterodimerization activity	GO:0001764//neuron migration;GO:0007155//cell adhesion;GO:0007160//cell-matrix adhesion;GO:0007229//integrin-mediated signaling pathway;GO:0007266//Rho protein signal transduction;GO:0007507//heart development;GO:0007613//memory;GO:0009410//response to xenobiotic stimulus;GO:0010628//positive regulation of gene expression;GO:0010634//positive regulation of epithelial cell migration;GO:0010811//po…	--
ENSMUSG00000001555	3.9	5.069	5.347	14.22	12.208	15.534	69.75	84.89	97.86	252.89	240.74	255	Fkbp10	FK506 binding protein 10 [Source:MGI Symbol;Acc:MGI:104769]	-	-	-	-	GO:0005758//mitochondrial intermembrane space;GO:0005783//endoplasmic reticulum;GO:0005788//endoplasmic reticulum lumen;GO:0016020//membrane	GO:0003755//peptidyl-prolyl cis-trans isomerase activity;GO:0005509//calcium ion binding;GO:0005528//FK506 binding;GO:0016853//isomerase activity;GO:0046872//metal ion binding	GO:0001701//in utero embryonic development;GO:0006457//protein folding;GO:0017185//peptidyl-lysine hydroxylation;GO:0018208//peptidyl-proline modification;GO:0030199//collagen fibril organization;GO:0035909//aorta morphogenesis;GO:0042060//wound healing;GO:0085029//extracellular matrix assembly	--
ENSMUSG00000001918	5.906	4.299	5.977	20.08	18.347	20.769	113	77	117	382	387	373	Slc1a5	solute carrier family 1 (neutral amino acid transporter), member 5 [Source:MGI Symbol;Acc:MGI:105305]	Organismal Systems;Human Diseases	Digestive system;Cancer: overview	ko04974//Protein digestion and absorption;ko05230//Central carbon metabolism in cancer	K05616;K05616	GO:0005886//plasma membrane;GO:0016020//membrane;GO:0016021//integral component of membrane	GO:0008514//organic anion transmembrane transporter activity;GO:0015172//acidic amino acid transmembrane transporter activity;GO:0015179//L-amino acid transmembrane transporter activity;GO:0015183//L-aspartate transmembrane transporter activity;GO:0015186//L-glutamine transmembrane transporter activity;GO:0015194//L-serine transmembrane transporter activity;GO:0015293//symporter activity	GO:0006835//dicarboxylic acid transport;GO:0006868//glutamine transport;GO:0010585//glutamine secretion;GO:0015800//acidic amino acid transport;GO:0015825//L-serine transport;GO:0070207//protein homotrimerization;GO:0140009//L-aspartate import across plasma membrane;GO:1903803//L-glutamine import across plasma membrane	--
ENSMUSG00000001985	95.33	92.483	93.865	9.149	9.638	9.348	5921	5378	5965	565	660	545	Grik3	glutamate receptor, ionotropic, kainate 3 [Source:MGI Symbol;Acc:MGI:95816]	Environmental Information Processing;Organismal Systems	Signaling molecules and interaction;Nervous system	ko04080//Neuroactive ligand-receptor interaction;ko04724//Glutamatergic synapse	K05203;K05203	GO:0005886//plasma membrane;GO:0016020//membrane;GO:0030424//axon;GO:0030425//dendrite;GO:0032839//dendrite cytoplasm;GO:0032983//kainate selective glutamate receptor complex;GO:0042734//presynaptic membrane;GO:0043195//terminal bouton;GO:0043204//perikaryon;GO:0045202//synapse;GO:0045211//postsynaptic membrane;GO:0098978//glutamatergic synapse	GO:0001640//adenylate cyclase inhibiting G protein-coupled glutamate receptor activity;GO:0004970//ionotropic glutamate receptor activity;GO:0005216//ion channel activity;GO:0005515//protein binding;GO:0008066//glutamate receptor activity;GO:0015276//ligand-gated ion channel activity;GO:0015277//kainate selective glutamate receptor activity;GO:0038023//signaling receptor activity;GO:0099507//liga…	GO:0006811//ion transport;GO:0007196//adenylate cyclase-inhibiting G protein-coupled glutamate receptor signaling pathway;GO:0007215//glutamate receptor signaling pathway;GO:0007216//G protein-coupled glutamate receptor signaling pathway;GO:0034220//ion transmembrane transport;GO:0035235//ionotropic glutamate receptor signaling pathway;GO:0035249//synaptic transmission, glutamatergic;GO:0042391//…	--
ENSMUSG00000001988	3.191	3.468	3.129	0.371	0.334	0.471	45	47	46	5	5	6	Npas1	neuronal PAS domain protein 1 [Source:MGI Symbol;Acc:MGI:109205]	-	-	-	-	GO:0005634//nucleus	GO:0000977//RNA polymerase II transcription regulatory region sequence-specific DNA binding;GO:0000981//DNA-binding transcription factor activity, RNA polymerase II-specific;GO:0003677//DNA binding;GO:0005515//protein binding;GO:0046982//protein heterodimerization activity;GO:0046983//protein dimerization activity	GO:0000122//negative regulation of transcription by RNA polymerase II;GO:0001964//startle response;GO:0006355//regulation of transcription, DNA-templated;GO:0006357//regulation of transcription by RNA polymerase II;GO:0042711//maternal behavior;GO:0045892//negative regulation of transcription, DNA-templated	bHLH
ENSMUSG00000002603	0.578	0.497	0.584	2.338	1.265	1.981	7	7	9	35	21	28	Tgfb1	transforming growth factor, beta 1 [Source:MGI Symbol;Acc:MGI:98725]	Human Diseases;Human Diseases;Environmental Information Processing;Environmental Information Processing;Human Diseases;Human Diseases;Human Diseases;Human Diseases;Human Diseases;Human Diseases;Human Diseases;Cellular Processes;Human Diseases;Organismal Systems;Human Diseases;Human Diseases;Environmental Information Processing;Human Diseases;Organismal Systems;Environmental Information Processing…	Cancer: overview;Infectious disease: bacterial;Signaling molecules and interaction;Signal transduction;Infectious disease: viral;Infectious disease: parasitic;Cardiovascular disease;Cardiovascular disease;Immune disease;Cancer: overview;Infectious disease: parasitic;Cell growth and death;Cancer: specific types;Immune system;Infectious disease: viral;Endocrine and metabolic disease;Signal transduc…	ko05200//Pathways in cancer;ko05152//Tuberculosis;ko04060//Cytokine-cytokine receptor interaction;ko04010//MAPK signaling pathway;ko05166//Human T-cell leukemia virus 1 infection;ko05146//Amoebiasis;ko05414//Dilated cardiomyopathy;ko05415//Diabetic cardiomyopathy;ko05323//Rheumatoid arthritis;ko05205//Proteoglycans in cancer;ko05140//Leishmaniasis;ko04218//Cellular senescence;ko05225//Hepatocellu…	K13375;K13375;K13375;K13375;K13375;K13375;K13375;K13375;K13375;K13375;K13375;K13375;K13375;K13375;K13375;K13375;K13375;K13375;K13375;K13375;K13375;K13375;K13375;K13375;K13375;K13375;K13375;K13375;K13375;K13375;K13375;K13375;K13375;K13375	GO:0005576//extracellular region;GO:0005615//extracellular space;GO:0005634//nucleus;GO:0005737//cytoplasm;GO:0005902//microvillus;GO:0009986//cell surface;GO:0030141//secretory granule;GO:0030424//axon;GO:0031012//extracellular matrix;GO:0043025//neuronal cell body;GO:0062023//collagen-containing extracellular matrix;GO:0070021//transforming growth factor beta ligand-receptor complex;GO:0071944/…	GO:0003823//antigen binding;GO:0005114//type II transforming growth factor beta receptor binding;GO:0005125//cytokine activity;GO:0005160//transforming growth factor beta receptor binding;GO:0005515//protein binding;GO:0008083//growth factor activity;GO:0019899//enzyme binding;GO:0034713//type I transforming growth factor beta receptor binding;GO:0034714//type III transforming growth factor beta …	GO:0000122//negative regulation of transcription by RNA polymerase II;GO:0000165//MAPK cascade;GO:0000902//cell morphogenesis;GO:0001501//skeletal system development;GO:0001570//vasculogenesis;GO:0001657//ureteric bud development;GO:0001666//response to hypoxia;GO:0001763//morphogenesis of a branching structure;GO:0001775//cell activation;GO:0001837//epithelial to mesenchymal transition;GO:000184…	--
ENSMUSG00000002900	2.875	3.712	2.713	9.843	9.883	10.308	115	139	111	386	434	387	Lamb1	laminin B1 [Source:MGI Symbol;Acc:MGI:96743]	Human Diseases;Environmental Information Processing;Human Diseases;Human Diseases;Cellular Processes;Human Diseases;Human Diseases;Environmental Information Processing	Cancer: overview;Signal transduction;Infectious disease: viral;Infectious disease: parasitic;Cellular community - eukaryotes;Infectious disease: parasitic;Cancer: specific types;Signaling molecules and interaction	ko05200//Pathways in cancer;ko04151//PI3K-Akt signaling pathway;ko05165//Human papillomavirus infection;ko05146//Amoebiasis;ko04510//Focal adhesion;ko05145//Toxoplasmosis;ko05222//Small cell lung cancer;ko04512//ECM-receptor interaction	K05636;K05636;K05636;K05636;K05636;K05636;K05636;K05636	GO:0005576//extracellular region;GO:0005604//basement membrane;GO:0005606//laminin-1 complex;GO:0005607//laminin-2 complex;GO:0005615//extracellular space;GO:0005634//nucleus;GO:0016020//membrane;GO:0031012//extracellular matrix;GO:0043256//laminin complex;GO:0043257//laminin-8 complex;GO:0043259//laminin-10 complex;GO:0048471//perinuclear region of cytoplasm;GO:0062023//collagen-containing extra…	GO:0005178//integrin binding;GO:0005201//extracellular matrix structural constituent;GO:0005515//protein binding;GO:0019899//enzyme binding;GO:0043208//glycosphingolipid binding	GO:0007155//cell adhesion;GO:0007162//negative regulation of cell adhesion;GO:0007566//embryo implantation;GO:0007611//learning or memory;GO:0009887//animal organ morphogenesis;GO:0009888//tissue development;GO:0016477//cell migration;GO:0021812//neuronal-glial interaction involved in cerebral cortex radial glia guided migration;GO:0030335//positive regulation of cell migration;GO:0031175//neuron…	--
ENSMUSG00000002908	2.153	3.983	2.71	5.247	7.154	6.173	42	67	55	73	89	100	Kcnn1	potassium intermediate/small conductance calcium-activated channel, subfamily N, member 1 [Source:MGI Symbol;Acc:MGI:1933993]	Organismal Systems;Organismal Systems	Endocrine system;Endocrine system	ko04911//Insulin secretion;ko04929//GnRH secretion	K04942;K04942	GO:0016020//membrane;GO:0016021//integral component of membrane	GO:0005242//inward rectifier potassium channel activity;GO:0005516//calmodulin binding;GO:0015269//calcium-activated potassium channel activity;GO:0016286//small conductance calcium-activated potassium channel activity	GO:0006811//ion transport;GO:0006813//potassium ion transport;GO:0071805//potassium ion transmembrane transport	--
ENSMUSG00000003032	0.811	0.357	1.381	47.643	45.742	42.664	17	7	14	950	1020	819	Klf4	Kruppel-like factor 4 (gut) [Source:MGI Symbol;Acc:MGI:1342287]	Human Diseases;Cellular Processes	Cancer: overview;Cellular community - eukaryotes	ko05207//Chemical carcinogenesis - receptor activation;ko04550//Signaling pathways regulating pluripotency of stem cells	K17846;K17846	GO:0000785//chromatin;GO:0000791//euchromatin;GO:0005634//nucleus;GO:0005654//nucleoplasm;GO:0005667//transcription regulator complex;GO:0005737//cytoplasm;GO:0005829//cytosol;GO:0015630//microtubule cytoskeleton	GO:0000976//transcription cis-regulatory region binding;GO:0000978//RNA polymerase II cis-regulatory region sequence-specific DNA binding;GO:0000981//DNA-binding transcription factor activity, RNA polymerase II-specific;GO:0001010//RNA polymerase II sequence-specific DNA-binding transcription factor recruiting activity;GO:0001221//transcription coregulator binding;GO:0001228//DNA-binding transcri…	GO:0000122//negative regulation of transcription by RNA polymerase II;GO:0002067//glandular epithelial cell differentiation;GO:0002357//defense response to tumor cell;GO:0006351//transcription, DNA-templated;GO:0006357//regulation of transcription by RNA polymerase II;GO:0006366//transcription by RNA polymerase II;GO:0008285//negative regulation of cell population proliferation;GO:0008544//epider…	zf-C2H2
ENSMUSG00000003279	56.973	55.25	58.011	13.705	13.711	12.533	1968	1842	2069	476	524	403	Dlgap1	DLG associated protein 1 [Source:MGI Symbol;Acc:MGI:1346065]	Organismal Systems	Nervous system	ko04724//Glutamatergic synapse	K15008	GO:0005886//plasma membrane;GO:0014069//postsynaptic density;GO:0016020//membrane;GO:0045202//synapse;GO:0045211//postsynaptic membrane;GO:0098978//glutamatergic synapse;GO:0099092//postsynaptic density, intracellular component;GO:0099572//postsynaptic specialization	GO:0005515//protein binding;GO:0019904//protein domain specific binding;GO:0044877//protein-containing complex binding;GO:0060090//molecular adaptor activity;GO:0098919//structural constituent of postsynaptic density	GO:0007268//chemical synaptic transmission;GO:0023052//signaling;GO:0035418//protein localization to synapse;GO:0050804//modulation of chemical synaptic transmission;GO:0061136//regulation of proteasomal protein catabolic process;GO:0070842//aggresome assembly;GO:0098962//regulation of postsynaptic neurotransmitter receptor activity;GO:0099562//maintenance of postsynaptic density structure	--
ENSMUSG00000003352	33.533	31.509	31.142	15.061	15.481	15.464	579	512	553	260	298	252	Cacnb3	calcium channel, voltage-dependent, beta 3 subunit [Source:MGI Symbol;Acc:MGI:103307]	Environmental Information Processing;Human Diseases;Organismal Systems;Organismal Systems;Human Diseases;Organismal Systems;Human Diseases	Signal transduction;Cardiovascular disease;Endocrine system;Circulatory system;Cardiovascular disease;Circulatory system;Cardiovascular disease	ko04010//MAPK signaling pathway;ko05414//Dilated cardiomyopathy;ko04921//Oxytocin signaling pathway;ko04261//Adrenergic signaling in cardiomyocytes;ko05410//Hypertrophic cardiomyopathy;ko04260//Cardiac muscle contraction;ko05412//Arrhythmogenic right ventricular cardiomyopathy	K04864;K04864;K04864;K04864;K04864;K04864;K04864	GO:0005737//cytoplasm;GO:0005886//plasma membrane;GO:0005891//voltage-gated calcium channel complex;GO:0016020//membrane;GO:0016324//apical plasma membrane;GO:0045202//synapse;GO:0110165//cellular anatomical entity;GO:1990454//L-type voltage-gated calcium channel complex	GO:0005244//voltage-gated ion channel activity;GO:0005245//voltage-gated calcium channel activity;GO:0005246//calcium channel regulator activity;GO:0005262//calcium channel activity;GO:0005515//protein binding;GO:0008331//high voltage-gated calcium channel activity;GO:0019901//protein kinase binding	GO:0006811//ion transport;GO:0006816//calcium ion transport;GO:0007268//chemical synaptic transmission;GO:0007528//neuromuscular junction development;GO:0034765//regulation of ion transmembrane transport;GO:0050852//T cell receptor signaling pathway;GO:0050966//detection of mechanical stimulus involved in sensory perception of pain;GO:0060402//calcium ion transport into cytosol;GO:0061577//calciu…	--
ENSMUSG00000003354	1.293	1.299	0.817	0.306	0.345	0.162	17	16	11	4	5	2	Ccdc65	coiled-coil domain containing 65 [Source:MGI Symbol;Acc:MGI:2146001]	-	-	-	-	GO:0005737//cytoplasm;GO:0005856//cytoskeleton;GO:0005858//axonemal dynein complex;GO:0005929//cilium;GO:0005930//axoneme;GO:0031514//motile cilium;GO:0036064//ciliary basal body;GO:0042995//cell projection	GO:0003674//molecular_function	GO:0003352//regulation of cilium movement;GO:0060271//cilium assembly;GO:0060285//cilium-dependent cell motility;GO:0070286//axonemal dynein complex assembly	--
ENSMUSG00000003410	101.981	101.231	99.366	16.202	16.424	17.531	3428	3106	3425	534	599.93	511	Elavl3	ELAV like RNA binding protein 3 [Source:MGI Symbol;Acc:MGI:109157]	-	-	-	-	GO:1990904//ribonucleoprotein complex	GO:0003676//nucleic acid binding;GO:0003723//RNA binding;GO:0035925//mRNA 3'-UTR AU-rich region binding	GO:0007399//nervous system development;GO:0030154//cell differentiation	--
ENSMUSG00000003526	45.69	46.208	51.017	4.603	4.215	5.347	627	608	684	63	69	54	Prodh	proline dehydrogenase [Source:MGI Symbol;Acc:MGI:97770]	Metabolism;Metabolism	Global and overview maps;Amino acid metabolism	ko01100//Metabolic pathways;ko00330//Arginine and proline metabolism	K00318;K00318	GO:0005654//nucleoplasm;GO:0005739//mitochondrion;GO:0005743//mitochondrial inner membrane;GO:0005759//mitochondrial matrix;GO:0043231//intracellular membrane-bounded organelle	GO:0004657//proline dehydrogenase activity;GO:0016491//oxidoreductase activity;GO:0016597//amino acid binding;GO:0071949//FAD binding	GO:0006560//proline metabolic process;GO:0006562//proline catabolic process;GO:0010133//proline catabolic process to glutamate;GO:0010942//positive regulation of cell death	--
ENSMUSG00000003541	3.449	3.684	2.122	56.396	57.813	58.922	27	27	17	439	499	433	Ier3	immediate early response 3 [Source:MGI Symbol;Acc:MGI:104814]	-	-	-	-	GO:0005634//nucleus;GO:0005739//mitochondrion;GO:0016020//membrane	GO:0005515//protein binding	GO:0001562//response to protozoan;GO:0003085//negative regulation of systemic arterial blood pressure;GO:0006096//glycolytic process;GO:0006282//regulation of DNA repair;GO:0007095//mitotic G2 DNA damage checkpoint signaling;GO:0008630//intrinsic apoptotic signaling pathway in response to DNA damage;GO:0043066//negative regulation of apoptotic process;GO:0045732//positive regulation of protein ca…	--
ENSMUSG00000003746	21.795	19.363	20.546	2.885	2.756	2.996	775	637	740	102	96	100	Man1a	mannosidase 1, alpha [Source:MGI Symbol;Acc:MGI:104677]	Metabolism;Genetic Information Processing;Metabolism;Metabolism	Global and overview maps;Folding, sorting and degradation;Glycan biosynthesis and metabolism;Glycan biosynthesis and metabolism	ko01100//Metabolic pathways;ko04141//Protein processing in endoplasmic reticulum;ko00510//N-Glycan biosynthesis;ko00513//Various types of N-glycan biosynthesis	K01230;K01230;K01230;K01230	GO:0000139//Golgi membrane;GO:0005783//endoplasmic reticulum;GO:0005793//endoplasmic reticulum-Golgi intermediate compartment;GO:0005794//Golgi apparatus;GO:0005829//cytosol;GO:0016020//membrane;GO:0031410//cytoplasmic vesicle	GO:0004571//mannosyl-oligosaccharide 1,2-alpha-mannosidase activity;GO:0005509//calcium ion binding;GO:0016787//hydrolase activity;GO:0016798//hydrolase activity, acting on glycosyl bonds;GO:0046872//metal ion binding	GO:0005975//carbohydrate metabolic process;GO:0006486//protein glycosylation;GO:0006491//N-glycan processing;GO:0008152//metabolic process;GO:0030433//ubiquitin-dependent ERAD pathway;GO:0045047//protein targeting to ER;GO:1904382//mannose trimming involved in glycoprotein ERAD pathway	--
ENSMUSG00000004043	1.81	2.623	3.075	0.784	0.655	0.844	47.31	51.75	52.79	20.17	17.12	14.19	Stat5a	signal transducer and activator of transcription 5A [Source:MGI Symbol;Acc:MGI:103036]	Human Diseases;Human Diseases;Human Diseases;Human Diseases;Environmental Information Processing;Cellular Processes;Human Diseases;Human Diseases;Organismal Systems;Organismal Systems;Human Diseases;Organismal Systems;Environmental Information Processing;Organismal Systems;Human Diseases;Human Diseases;Human Diseases	Cancer: overview;Infectious disease: viral;Cancer: overview;Cancer: overview;Signal transduction;Cell growth and death;Infectious disease: viral;Infectious disease: viral;Endocrine system;Immune system;Endocrine and metabolic disease;Immune system;Signal transduction;Endocrine system;Cancer: specific types;Cancer: specific types;Cancer: specific types	ko05200//Pathways in cancer;ko05166//Human T-cell leukemia virus 1 infection;ko05203//Viral carcinogenesis;ko05207//Chemical carcinogenesis - receptor activation;ko04630//JAK-STAT signaling pathway;ko04217//Necroptosis;ko05161//Hepatitis B;ko05162//Measles;ko04935//Growth hormone synthesis, secretion and action;ko04659//Th17 cell differentiation;ko04933//AGE-RAGE signaling pathway in diabetic com…	K11223;K11223;K11223;K11223;K11223;K11223;K11223;K11223;K11223;K11223;K11223;K11223;K11223;K11223;K11223;K11223;K11223	GO:0005634//nucleus;GO:0005654//nucleoplasm;GO:0005737//cytoplasm;GO:0005829//cytosol	GO:0000978//RNA polymerase II cis-regulatory region sequence-specific DNA binding;GO:0000981//DNA-binding transcription factor activity, RNA polymerase II-specific;GO:0001228//DNA-binding transcription activator activity, RNA polymerase II-specific;GO:0003677//DNA binding;GO:0003690//double-stranded DNA binding;GO:0003700//DNA-binding transcription factor activity;GO:0005515//protein binding;GO:0…	GO:0000278//mitotic cell cycle;GO:0001553//luteinization;GO:0001779//natural killer cell differentiation;GO:0001938//positive regulation of endothelial cell proliferation;GO:0006355//regulation of transcription, DNA-templated;GO:0006357//regulation of transcription by RNA polymerase II;GO:0006366//transcription by RNA polymerase II;GO:0006952//defense response;GO:0007165//signal transduction;GO:0…	STAT
ENSMUSG00000004347	4.006	4.511	5.849	10.867	10.096	10.019	195	188	252	428	483	421	Pde1c	phosphodiesterase 1C [Source:MGI Symbol;Acc:MGI:108413]	Metabolism;Organismal Systems;Environmental Information Processing;Metabolism;Human Diseases;Organismal Systems;Organismal Systems	Global and overview maps;Sensory system;Signal transduction;Nucleotide metabolism;Substance dependence;Sensory system;Endocrine system	ko01100//Metabolic pathways;ko04740//Olfactory transduction;ko04020//Calcium signaling pathway;ko00230//Purine metabolism;ko05032//Morphine addiction;ko04742//Taste transduction;ko04924//Renin secretion	K13755;K13755;K13755;K13755;K13755;K13755;K13755	GO:0005764//lysosome;GO:0005929//cilium;GO:0043025//neuronal cell body	GO:0004114//3',5'-cyclic-nucleotide phosphodiesterase activity;GO:0004115//3',5'-cyclic-AMP phosphodiesterase activity;GO:0004117//calmodulin-dependent cyclic-nucleotide phosphodiesterase activity;GO:0005516//calmodulin binding;GO:0008081//phosphoric diester hydrolase activity;GO:0016787//hydrolase activity;GO:0030552//cAMP binding;GO:0046872//metal ion binding;GO:0047555//3',5'-cyclic-GMP phosph…	GO:0007165//signal transduction;GO:0007608//sensory perception of smell;GO:0051592//response to calcium ion;GO:0061179//negative regulation of insulin secretion involved in cellular response to glucose stimulus	--
ENSMUSG00000004626	4.528	6.946	7.894	2.738	1.85	2.775	66	77.35	90	32.42	32	35.08	Stxbp2	syntaxin binding protein 2 [Source:MGI Symbol;Acc:MGI:107370]	-	-	-	-	GO:0005737//cytoplasm;GO:0005829//cytosol;GO:0005886//plasma membrane;GO:0016324//apical plasma membrane;GO:0030027//lamellipodium;GO:0030141//secretory granule;GO:0032991//protein-containing complex;GO:0042581//specific granule;GO:0042582//azurophil granule;GO:0042589//zymogen granule membrane;GO:0044194//cytolytic granule;GO:0045335//phagocytic vesicle;GO:0070820//tertiary granule;GO:0098793//p…	GO:0005515//protein binding;GO:0017075//syntaxin-1 binding;GO:0019905//syntaxin binding;GO:0030348//syntaxin-3 binding	GO:0001909//leukocyte mediated cytotoxicity;GO:0006886//intracellular protein transport;GO:0006887//exocytosis;GO:0006904//vesicle docking involved in exocytosis;GO:0007269//neurotransmitter secretion;GO:0015031//protein transport;GO:0016192//vesicle-mediated transport;GO:0043304//regulation of mast cell degranulation;GO:0043306//positive regulation of mast cell degranulation;GO:0043312//neutroph…	--
ENSMUSG00000004894	0.948	0.721	0.817	0.085	0	0	9	8	5	1	0	0	Hapln2	hyaluronan and proteoglycan link protein 2 [Source:MGI Symbol;Acc:MGI:2137300]	-	-	-	-	GO:0005576//extracellular region;GO:0031012//extracellular matrix;GO:0033268//node of Ranvier	GO:0005540//hyaluronic acid binding	GO:0001501//skeletal system development;GO:0007155//cell adhesion;GO:0007417//central nervous system development;GO:0008065//establishment of blood-nerve barrier;GO:0085029//extracellular matrix assembly	--
ENSMUSG00000005045	4.189	4.444	4.598	1.576	1.829	1.833	270	266	301	100	129	111	Chd5	chromodomain helicase DNA binding protein 5 [Source:MGI Symbol;Acc:MGI:3036258]	-	-	-	-	GO:0000785//chromatin;GO:0000792//heterochromatin;GO:0005634//nucleus;GO:0005654//nucleoplasm;GO:0005829//cytosol;GO:0016581//NuRD complex;GO:0016607//nuclear speck;GO:0043231//intracellular membrane-bounded organelle	GO:0000166//nucleotide binding;GO:0003677//DNA binding;GO:0003678//DNA helicase activity;GO:0003682//chromatin binding;GO:0004386//helicase activity;GO:0005515//protein binding;GO:0005524//ATP binding;GO:0016787//hydrolase activity;GO:0016887//ATP hydrolysis activity;GO:0042393//histone binding;GO:0042826//histone deacetylase binding;GO:0046872//metal ion binding;GO:0061628//H3K27me3 modified his…	GO:0000122//negative regulation of transcription by RNA polymerase II;GO:0006325//chromatin organization;GO:0006338//chromatin remodeling;GO:0006357//regulation of transcription by RNA polymerase II;GO:0006366//transcription by RNA polymerase II;GO:0007283//spermatogenesis;GO:0007399//nervous system development;GO:0008285//negative regulation of cell population proliferation;GO:0021895//cerebral …	--
ENSMUSG00000005125	3.189	3.447	2.444	6.387	5.397	7.831	55	50	50	127	119	147	Ndrg1	N-myc downstream regulated gene 1 [Source:MGI Symbol;Acc:MGI:1341799]	-	-	-	-	GO:0005634//nucleus;GO:0005737//cytoplasm;GO:0005813//centrosome;GO:0005815//microtubule organizing center;GO:0005829//cytosol;GO:0005856//cytoskeleton;GO:0005874//microtubule;GO:0005886//plasma membrane;GO:0005912//adherens junction;GO:0015630//microtubule cytoskeleton;GO:0016020//membrane;GO:0043209//myelin sheath;GO:0048471//perinuclear region of cytoplasm;GO:0055038//recycling endosome membra…	GO:0008017//microtubule binding;GO:0031267//small GTPase binding;GO:0043015//gamma-tubulin binding;GO:0045296//cadherin binding	GO:0007165//signal transduction;GO:0008285//negative regulation of cell population proliferation;GO:0030330//DNA damage response, signal transduction by p53 class mediator;GO:0032287//peripheral nervous system myelin maintenance;GO:0042127//regulation of cell population proliferation;GO:0045576//mast cell activation;GO:0071456//cellular response to hypoxia	--
ENSMUSG00000005338	91.554	93.907	93.44	17.018	18.165	17.549	2659	2495.98	2786.9	459	531	439	Cadm3	cell adhesion molecule 3 [Source:MGI Symbol;Acc:MGI:2137858]	Environmental Information Processing	Signaling molecules and interaction	ko04514//Cell adhesion molecules	K06780	GO:0005886//plasma membrane;GO:0005911//cell-cell junction;GO:0016020//membrane;GO:0042734//presynaptic membrane;GO:0070161//anchoring junction;GO:0098688//parallel fiber to Purkinje cell synapse	GO:0005515//protein binding;GO:0042803//protein homodimerization activity	GO:0007155//cell adhesion;GO:0007156//homophilic cell adhesion via plasma membrane adhesion molecules;GO:0007157//heterophilic cell-cell adhesion via plasma membrane cell adhesion molecules;GO:0008104//protein localization	--
ENSMUSG00000005373	0.36	0.819	0.468	0.775	2.96	2.709	8	10	12	16	34	21	Mlxipl	MLX interacting protein-like [Source:MGI Symbol;Acc:MGI:1927999]	Human Diseases;Human Diseases	Endocrine and metabolic disease;Endocrine and metabolic disease	ko04932//Non-alcoholic fatty liver disease;ko04931//Insulin resistance	K09113;K09113	GO:0005634//nucleus;GO:0005654//nucleoplasm;GO:0005667//transcription regulator complex;GO:0005737//cytoplasm;GO:0005829//cytosol	GO:0000978//RNA polymerase II cis-regulatory region sequence-specific DNA binding;GO:0000981//DNA-binding transcription factor activity, RNA polymerase II-specific;GO:0001227//DNA-binding transcription repressor activity, RNA polymerase II-specific;GO:0003677//DNA binding;GO:0003700//DNA-binding transcription factor activity;GO:0005515//protein binding;GO:0019901//protein kinase binding;GO:003553…	GO:0000122//negative regulation of transcription by RNA polymerase II;GO:0006110//regulation of glycolytic process;GO:0006357//regulation of transcription by RNA polymerase II;GO:0008284//positive regulation of cell population proliferation;GO:0009749//response to glucose;GO:0010255//glucose mediated signaling pathway;GO:0033137//negative regulation of peptidyl-serine phosphorylation;GO:0042593//…	bHLH
ENSMUSG00000005533	16.487	17.014	15.866	37.849	37.04	35.208	1302	1258	1282	2972	3225	2610	Igf1r	insulin-like growth factor I receptor [Source:MGI Symbol;Acc:MGI:96433]	Human Diseases;Environmental Information Processing;Human Diseases;Environmental Information Processing;Cellular Processes;Environmental Information Processing;Environmental Information Processing;Human Diseases;Cellular Processes;Human Diseases;Environmental Information Processing;Human Diseases;Cellular Processes;Cellular Processes;Environmental Information Processing;Environmental Information …	Cancer: overview;Signal transduction;Cancer: overview;Signal transduction;Transport and catabolism;Signal transduction;Signal transduction;Cancer: overview;Cellular community - eukaryotes;Cancer: specific types;Signal transduction;Cancer: specific types;Transport and catabolism;Cellular community - eukaryotes;Signal transduction;Signal transduction;Cell growth and death;Signal transduction;Cancer…	ko05200//Pathways in cancer;ko04151//PI3K-Akt signaling pathway;ko05202//Transcriptional misregulation in cancer;ko04010//MAPK signaling pathway;ko04144//Endocytosis;ko04014//Ras signaling pathway;ko04015//Rap1 signaling pathway;ko05205//Proteoglycans in cancer;ko04510//Focal adhesion;ko05225//Hepatocellular carcinoma;ko04150//mTOR signaling pathway;ko05224//Breast cancer;ko04140//Autophagy - ani…	K05087;K05087;K05087;K05087;K05087;K05087;K05087;K05087;K05087;K05087;K05087;K05087;K05087;K05087;K05087;K05087;K05087;K05087;K05087;K05087;K05087;K05087;K05087;K05087;K05087;K05087;K05087;K05087;K05087	GO:0005634//nucleus;GO:0005737//cytoplasm;GO:0005886//plasma membrane;GO:0005901//caveola;GO:0016020//membrane;GO:0016021//integral component of membrane;GO:0030315//T-tubule;GO:0030424//axon;GO:0035867//alphav-beta3 integrin-IGF-1-IGF1R complex;GO:0043005//neuron projection;GO:0043025//neuronal cell body;GO:0043231//intracellular membrane-bounded organelle;GO:0043235//receptor complex;GO:1902911…	GO:0000166//nucleotide binding;GO:0001965//G-protein alpha-subunit binding;GO:0004672//protein kinase activity;GO:0004713//protein tyrosine kinase activity;GO:0004714//transmembrane receptor protein tyrosine kinase activity;GO:0005010//insulin-like growth factor-activated receptor activity;GO:0005158//insulin receptor binding;GO:0005515//protein binding;GO:0005520//insulin-like growth factor bind…	GO:0003230//cardiac atrium development;GO:0006468//protein phosphorylation;GO:0006955//immune response;GO:0007169//transmembrane receptor protein tyrosine kinase signaling pathway;GO:0007409//axonogenesis;GO:0007568//aging;GO:0008284//positive regulation of cell population proliferation;GO:0008286//insulin receptor signaling pathway;GO:0010656//negative regulation of muscle cell apoptotic process…	--
ENSMUSG00000005553	0.41	0.313	0.446	0.792	0.827	0.927	5	7	11	19	22	21	Atp4a	ATPase, H+/K+ exchanging, gastric, alpha polypeptide [Source:MGI Symbol;Acc:MGI:88113]	Metabolism;Metabolism;Organismal Systems;Organismal Systems	Global and overview maps;Energy metabolism;Digestive system;Excretory system	ko01100//Metabolic pathways;ko00190//Oxidative phosphorylation;ko04971//Gastric acid secretion;ko04966//Collecting duct acid secretion	K01542;K01542;K01542;K01542	GO:0005886//plasma membrane;GO:0016020//membrane;GO:0016021//integral component of membrane;GO:0016324//apical plasma membrane	GO:0000166//nucleotide binding;GO:0000287//magnesium ion binding;GO:0005215//transporter activity;GO:0005391//P-type sodium:potassium-exchanging transporter activity;GO:0005515//protein binding;GO:0005524//ATP binding;GO:0008556//P-type potassium transmembrane transporter activity;GO:0008900//P-type potassium:proton transporter activity;GO:0016887//ATP hydrolysis activity;GO:0019829//ATPase-coupl…	GO:0006811//ion transport;GO:0006813//potassium ion transport;GO:0006883//cellular sodium ion homeostasis;GO:0009410//response to xenobiotic stimulus;GO:0010155//regulation of proton transport;GO:0010248//establishment or maintenance of transmembrane electrochemical gradient;GO:0030007//cellular potassium ion homeostasis;GO:0036376//sodium ion export across plasma membrane;GO:0045851//pH reductio…	--
ENSMUSG00000006219	1.09	0.785	0.093	2.765	2.578	1.166	6	7	2	28	26	23	Fblim1	filamin binding LIM protein 1 [Source:MGI Symbol;Acc:MGI:1921452]	-	-	-	-	GO:0001650//fibrillar center;GO:0001725//stress fiber;GO:0005737//cytoplasm;GO:0005856//cytoskeleton;GO:0005925//focal adhesion;GO:0030054//cell junction;GO:0070161//anchoring junction;GO:0071944//cell periphery	GO:0005515//protein binding;GO:0031005//filamin binding;GO:0046872//metal ion binding	GO:0007155//cell adhesion;GO:0008360//regulation of cell shape;GO:0033623//regulation of integrin activation;GO:0098609//cell-cell adhesion	--
ENSMUSG00000006345	1.357	1.586	1.407	0.764	0.418	0.196	16	22	16	7	4	1	Ggt1	gamma-glutamyltransferase 1 [Source:MGI Symbol;Acc:MGI:95706]	Metabolism;Metabolism;Metabolism;Metabolism	Global and overview maps;Lipid metabolism;Metabolism of other amino acids;Metabolism of other amino acids	ko01100//Metabolic pathways;ko00590//Arachidonic acid metabolism;ko00480//Glutathione metabolism;ko00430//Taurine and hypotaurine metabolism	K18592;K18592;K18592;K18592	GO:0005615//extracellular space;GO:0005783//endoplasmic reticulum;GO:0005886//plasma membrane;GO:0016020//membrane;GO:0031982//vesicle;GO:0048471//perinuclear region of cytoplasm	GO:0000048//peptidyltransferase activity;GO:0002951//leukotriene-C(4) hydrolase;GO:0008233//peptidase activity;GO:0016740//transferase activity;GO:0016746//acyltransferase activity;GO:0016755//aminoacyltransferase activity;GO:0016787//hydrolase activity;GO:0036374//glutathione hydrolase activity;GO:0102953//hypoglycin A gamma-glutamyl transpeptidase activity;GO:0103068//leukotriene C4 gamma-gluta…	GO:0002682//regulation of immune system process;GO:0006508//proteolysis;GO:0006536//glutamate metabolic process;GO:0006749//glutathione metabolic process;GO:0006750//glutathione biosynthetic process;GO:0006751//glutathione catabolic process;GO:0007283//spermatogenesis;GO:0007568//aging;GO:0019344//cysteine biosynthetic process;GO:0031179//peptide modification;GO:0031638//zymogen activation;GO:003…	--
ENSMUSG00000006435	0.973	0.99	0.789	2.9	2.168	3.424	27	25	22	56	62	55	Neurl1a	neuralized E3 ubiquitin protein ligase 1A [Source:MGI Symbol;Acc:MGI:1334263]	-	-	-	-	GO:0005737//cytoplasm;GO:0005886//plasma membrane;GO:0014069//postsynaptic density;GO:0016020//membrane;GO:0030425//dendrite;GO:0042995//cell projection;GO:0043197//dendritic spine;GO:0043204//perikaryon;GO:0045202//synapse;GO:0048471//perinuclear region of cytoplasm;GO:0097440//apical dendrite	GO:0004842//ubiquitin-protein transferase activity;GO:0005515//protein binding;GO:0016740//transferase activity;GO:0045183//translation factor activity, non-nucleic acid binding;GO:0046872//metal ion binding;GO:0061630//ubiquitin protein ligase activity	GO:0006417//regulation of translation;GO:0006513//protein monoubiquitination;GO:0007219//Notch signaling pathway;GO:0007288//sperm axoneme assembly;GO:0007399//nervous system development;GO:0007420//brain development;GO:0007519//skeletal muscle tissue development;GO:0007595//lactation;GO:0008285//negative regulation of cell population proliferation;GO:0016567//protein ubiquitination;GO:0030317//f…	--
ENSMUSG00000006445	1.255	0.986	0.65	1.745	1.808	2.635	34	25	18	47	54	67	Epha2	Eph receptor A2 [Source:MGI Symbol;Acc:MGI:95278]	Environmental Information Processing;Environmental Information Processing;Environmental Information Processing;Environmental Information Processing;Organismal Systems	Signal transduction;Signal transduction;Signal transduction;Signal transduction;Development and regeneration	ko04151//PI3K-Akt signaling pathway;ko04010//MAPK signaling pathway;ko04014//Ras signaling pathway;ko04015//Rap1 signaling pathway;ko04360//Axon guidance	K05103;K05103;K05103;K05103;K05103	GO:0005886//plasma membrane;GO:0005887//integral component of plasma membrane;GO:0005925//focal adhesion;GO:0009986//cell surface;GO:0016020//membrane;GO:0016021//integral component of membrane;GO:0030027//lamellipodium;GO:0031256//leading edge membrane;GO:0031258//lamellipodium membrane;GO:0032587//ruffle membrane;GO:0042995//cell projection;GO:0043005//neuron projection;GO:0043235//receptor com…	GO:0000166//nucleotide binding;GO:0004672//protein kinase activity;GO:0004713//protein tyrosine kinase activity;GO:0004714//transmembrane receptor protein tyrosine kinase activity;GO:0005003//ephrin receptor activity;GO:0005005//transmembrane-ephrin receptor activity;GO:0005515//protein binding;GO:0005524//ATP binding;GO:0016301//kinase activity;GO:0016740//transferase activity;GO:0019838//growth…	GO:0001501//skeletal system development;GO:0001525//angiogenesis;GO:0001568//blood vessel development;GO:0001570//vasculogenesis;GO:0001649//osteoblast differentiation;GO:0001818//negative regulation of cytokine production;GO:0002043//blood vessel endothelial cell proliferation involved in sprouting angiogenesis;GO:0006468//protein phosphorylation;GO:0006915//apoptotic process;GO:0006954//inflamm…	--
ENSMUSG00000006567	14.302	12.714	13.414	3.755	3.02	2.863	644	536	618	161	144	121	Atp7b	ATPase, Cu++ transporting, beta polypeptide [Source:MGI Symbol;Acc:MGI:103297]	Human Diseases;Organismal Systems	Drug resistance: antineoplastic;Digestive system	ko01524//Platinum drug resistance;ko04978//Mineral absorption	K17686;K17686	GO:0005768//endosome;GO:0005770//late endosome;GO:0005783//endoplasmic reticulum;GO:0005794//Golgi apparatus;GO:0005802//trans-Golgi network;GO:0005886//plasma membrane;GO:0005923//bicellular tight junction;GO:0016020//membrane;GO:0016021//integral component of membrane;GO:0016323//basolateral plasma membrane;GO:0031410//cytoplasmic vesicle;GO:0032588//trans-Golgi network membrane;GO:0045177//api…	GO:0000166//nucleotide binding;GO:0005215//transporter activity;GO:0005375//copper ion transmembrane transporter activity;GO:0005507//copper ion binding;GO:0005524//ATP binding;GO:0008270//zinc ion binding;GO:0016887//ATP hydrolysis activity;GO:0019829//ATPase-coupled cation transmembrane transporter activity;GO:0043682//P-type divalent copper transporter activity;GO:0046872//metal ion binding;GO…	GO:0006811//ion transport;GO:0006812//cation transport;GO:0006825//copper ion transport;GO:0006878//cellular copper ion homeostasis;GO:0006882//cellular zinc ion homeostasis;GO:0007595//lactation;GO:0015677//copper ion import;GO:0015680//protein maturation by copper ion transfer;GO:0035434//copper ion transmembrane transport;GO:0046688//response to copper ion;GO:0051208//sequestering of calcium i…	--
ENSMUSG00000006586	5.158	4.493	4.605	2.044	2.708	2.017	172	137	144	79	78	72	Runx1t1	RUNX1 translocation partner 1 [Source:MGI Symbol;Acc:MGI:104793]	Human Diseases;Human Diseases;Human Diseases	Cancer: overview;Cancer: overview;Cancer: specific types	ko05200//Pathways in cancer;ko05202//Transcriptional misregulation in cancer;ko05221//Acute myeloid leukemia	K10053;K10053;K10053	GO:0005634//nucleus;GO:0005654//nucleoplasm;GO:0016363//nuclear matrix;GO:0017053//transcription repressor complex	GO:0003714//transcription corepressor activity;GO:0005515//protein binding;GO:0042802//identical protein binding;GO:0046872//metal ion binding;GO:0140297//DNA-binding transcription factor binding	GO:0006351//transcription, DNA-templated;GO:0006355//regulation of transcription, DNA-templated;GO:0010977//negative regulation of neuron projection development;GO:0045444//fat cell differentiation;GO:0045599//negative regulation of fat cell differentiation;GO:0045892//negative regulation of transcription, DNA-templated;GO:0051101//regulation of DNA binding	--
ENSMUSG00000007021	6.396	6.675	6.252	3.401	2.334	3.446	87	85	87	46	35	44	Syngr3	synaptogyrin 3 [Source:MGI Symbol;Acc:MGI:1341881]	-	-	-	-	GO:0008021//synaptic vesicle;GO:0016020//membrane;GO:0030672//synaptic vesicle membrane;GO:0031410//cytoplasmic vesicle;GO:0031594//neuromuscular junction;GO:0045202//synapse	GO:0005515//protein binding;GO:0042169//SH2 domain binding;GO:0047485//protein N-terminus binding	GO:0032411//positive regulation of transporter activity;GO:0045055//regulated exocytosis;GO:0051580//regulation of neurotransmitter uptake	--
ENSMUSG00000007279	0.122	0.32	0.098	3.385	2.942	2.751	3	6	2	83	80	63	Scube2	signal peptide, CUB domain, EGF-like 2 [Source:MGI Symbol;Acc:MGI:1928765]	Environmental Information Processing	Signal transduction	ko04340//Hedgehog signaling pathway	K24706	GO:0005576//extracellular region;GO:0005615//extracellular space;GO:0009986//cell surface;GO:0019897//extrinsic component of plasma membrane	GO:0005509//calcium ion binding;GO:0005515//protein binding;GO:0008289//lipid binding;GO:0042802//identical protein binding;GO:0097108//hedgehog family protein binding	GO:0003413//chondrocyte differentiation involved in endochondral bone morphogenesis;GO:0007165//signal transduction;GO:0009966//regulation of signal transduction;GO:0045669//positive regulation of osteoblast differentiation;GO:0045778//positive regulation of ossification;GO:0045880//positive regulation of smoothened signaling pathway;GO:1902732//positive regulation of chondrocyte proliferation	--
ENSMUSG00000007379	0.377	0.403	0.724	1.33	0.979	0.835	13	13	25	45	37	27	Dennd2c	DENN/MADD domain containing 2C [Source:MGI Symbol;Acc:MGI:3036254]	-	-	-	-	GO:0005654//nucleoplasm	GO:0005085//guanyl-nucleotide exchange factor activity	-	--
ENSMUSG00000007594	0.752	0.381	0.619	5.496	5.711	5.569	19	9	16	138	159	132	Hapln4	hyaluronan and proteoglycan link protein 4 [Source:MGI Symbol;Acc:MGI:2679531]	-	-	-	-	GO:0005576//extracellular region;GO:0031012//extracellular matrix;GO:0045202//synapse;GO:0072534//perineuronal net	GO:0005540//hyaluronic acid binding;GO:0150043//structural constituent of synapse-associated extracellular matrix	GO:0001501//skeletal system development;GO:0007155//cell adhesion;GO:0007417//central nervous system development;GO:0051932//synaptic transmission, GABAergic;GO:1904862//inhibitory synapse assembly	--
ENSMUSG00000007888	1.826	1.759	1.047	5.022	4.13	4.387	8	10	6	30	39	31	Crlf1	cytokine receptor-like factor 1 [Source:MGI Symbol;Acc:MGI:1340030]	-	-	-	-	GO:0005576//extracellular region;GO:0005615//extracellular space;GO:0009897//external side of plasma membrane;GO:0043235//receptor complex;GO:0097058//CRLF-CLCF1 complex	GO:0004896//cytokine receptor activity;GO:0005125//cytokine activity;GO:0005127//ciliary neurotrophic factor receptor binding;GO:0005515//protein binding;GO:0019955//cytokine binding	GO:0001657//ureteric bud development;GO:0008284//positive regulation of cell population proliferation;GO:0019221//cytokine-mediated signaling pathway;GO:0042531//positive regulation of tyrosine phosphorylation of STAT protein;GO:0043524//negative regulation of neuron apoptotic process;GO:2000672//negative regulation of motor neuron apoptotic process	--
ENSMUSG00000008136	6.193	7.602	7.679	3.254	2.264	2.462	67	77	85	35	27	25	Fhl2	four and a half LIM domains 2 [Source:MGI Symbol;Acc:MGI:1338762]	Organismal Systems	Development and regeneration	ko04380//Osteoclast differentiation	K14380	GO:0005634//nucleus;GO:0005737//cytoplasm;GO:0030018//Z disc;GO:0031430//M band	GO:0003712//transcription coregulator activity;GO:0003714//transcription corepressor activity;GO:0005515//protein binding;GO:0008134//transcription factor binding;GO:0042802//identical protein binding;GO:0043425//bHLH transcription factor binding;GO:0046872//metal ion binding	GO:0000122//negative regulation of transcription by RNA polymerase II;GO:0001649//osteoblast differentiation;GO:0006351//transcription, DNA-templated;GO:0006357//regulation of transcription by RNA polymerase II;GO:0009725//response to hormone;GO:0043066//negative regulation of apoptotic process;GO:0055014//atrial cardiac muscle cell development;GO:0055015//ventricular cardiac muscle cell developm…	--
ENSMUSG00000008305	16.424	19.3	16.075	39.511	40.671	44.185	316	322	339	755	900	829	Tle1	transducin-like enhancer of split 1 [Source:MGI Symbol;Acc:MGI:104636]	Environmental Information Processing;Environmental Information Processing;Environmental Information Processing	Signal transduction;Signal transduction;Signal transduction	ko04310//Wnt signaling pathway;ko04013//MAPK signaling pathway - fly;ko04330//Notch signaling pathway	K04497;K04497;K04497	GO:0005634//nucleus;GO:0005654//nucleoplasm;GO:0005667//transcription regulator complex;GO:0005737//cytoplasm;GO:0005829//cytosol;GO:1990907//beta-catenin-TCF complex	GO:0003682//chromatin binding;GO:0003714//transcription corepressor activity;GO:0005515//protein binding;GO:0042802//identical protein binding;GO:0140297//DNA-binding transcription factor binding	GO:0000122//negative regulation of transcription by RNA polymerase II;GO:0006355//regulation of transcription, DNA-templated;GO:0006357//regulation of transcription by RNA polymerase II;GO:0010628//positive regulation of gene expression;GO:0016055//Wnt signaling pathway;GO:0030178//negative regulation of Wnt signaling pathway;GO:0043124//negative regulation of I-kappaB kinase/NF-kappaB signaling;…	--
ENSMUSG00000009075	0.668	0.898	0.654	0.284	0.153	0.12	12.15	15.3	12.17	5.13	3.06	2.05	Cabp7	calcium binding protein 7 [Source:MGI Symbol;Acc:MGI:2183437]	-	-	-	-	GO:0005737//cytoplasm;GO:0005794//Golgi apparatus;GO:0005886//plasma membrane;GO:0016020//membrane;GO:0032588//trans-Golgi network membrane;GO:0048471//perinuclear region of cytoplasm	GO:0003674//molecular_function;GO:0005509//calcium ion binding;GO:0046872//metal ion binding	GO:0008150//biological_process	--
ENSMUSG00000009376	3.147	2.541	3.119	1.367	1.42	1.289	112	96	146	37	45	34	Met	met proto-oncogene [Source:MGI Symbol;Acc:MGI:96969]	Human Diseases;Environmental Information Processing;Environmental Information Processing;Human Diseases;Environmental Information Processing;Environmental Information Processing;Human Diseases;Environmental Information Processing;Human Diseases;Cellular Processes;Organismal Systems;Human Diseases;Human Diseases;Human Diseases;Organismal Systems;Human Diseases;Human Diseases;Human Diseases;Cellula…	Cancer: overview;Signal transduction;Signal transduction;Cancer: overview;Signal transduction;Signal transduction;Cancer: overview;Signal transduction;Cancer: overview;Cellular community - eukaryotes;Development and regeneration;Cancer: specific types;Cancer: overview;Cancer: specific types;Development and regeneration;Infectious disease: bacterial;Drug resistance: antineoplastic;Cancer: specific…	ko05200//Pathways in cancer;ko04151//PI3K-Akt signaling pathway;ko04020//Calcium signaling pathway;ko05202//Transcriptional misregulation in cancer;ko04010//MAPK signaling pathway;ko04014//Ras signaling pathway;ko05208//Chemical carcinogenesis - reactive oxygen species;ko04015//Rap1 signaling pathway;ko05205//Proteoglycans in cancer;ko04510//Focal adhesion;ko04360//Axon guidance;ko05225//Hepatoce…	K05099;K05099;K05099;K05099;K05099;K05099;K05099;K05099;K05099;K05099;K05099;K05099;K05099;K05099;K05099;K05099;K05099;K05099;K05099;K05099;K05099;K05099;K05099;K05099	GO:0009925//basal plasma membrane;GO:0016020//membrane;GO:0016021//integral component of membrane	GO:0000166//nucleotide binding;GO:0004672//protein kinase activity;GO:0004713//protein tyrosine kinase activity;GO:0004714//transmembrane receptor protein tyrosine kinase activity;GO:0005515//protein binding;GO:0005524//ATP binding;GO:0017154//semaphorin receptor activity;GO:0019903//protein phosphatase binding;GO:0042802//identical protein binding	GO:0001886//endothelial cell morphogenesis;GO:0006468//protein phosphorylation;GO:0007169//transmembrane receptor protein tyrosine kinase signaling pathway;GO:0018108//peptidyl-tyrosine phosphorylation;GO:0031116//positive regulation of microtubule polymerization;GO:0035024//negative regulation of Rho protein signal transduction;GO:0045944//positive regulation of transcription by RNA polymerase I…	--
ENSMUSG00000010021	37.475	39.447	38.024	3.025	2.537	3.639	826	760	891	50	55	58	Kif19a	kinesin family member 19A [Source:MGI Symbol;Acc:MGI:2447024]	-	-	-	-	GO:0005737//cytoplasm;GO:0005856//cytoskeleton;GO:0005871//kinesin complex;GO:0005874//microtubule;GO:0005929//cilium;GO:0005930//axoneme;GO:0042995//cell projection	GO:0000166//nucleotide binding;GO:0003774//cytoskeletal motor activity;GO:0003777//microtubule motor activity;GO:0005524//ATP binding;GO:0008017//microtubule binding;GO:0008574//plus-end-directed microtubule motor activity;GO:0016887//ATP hydrolysis activity	GO:0007018//microtubule-based movement;GO:0060404//axonemal microtubule depolymerization;GO:0070462//plus-end specific microtubule depolymerization	--
ENSMUSG00000010175	16.039	16.643	15.352	34.356	33.6	34.917	854	799	844	1826	1968	1722	Prox1	prospero homeobox 1 [Source:MGI Symbol;Acc:MGI:97772]	Environmental Information Processing	Signal transduction	ko04013//MAPK signaling pathway - fly	K20211	GO:0005634//nucleus;GO:0005654//nucleoplasm;GO:0005737//cytoplasm;GO:0005829//cytosol	GO:0000976//transcription cis-regulatory region binding;GO:0000978//RNA polymerase II cis-regulatory region sequence-specific DNA binding;GO:0000981//DNA-binding transcription factor activity, RNA polymerase II-specific;GO:0001227//DNA-binding transcription repressor activity, RNA polymerase II-specific;GO:0003677//DNA binding;GO:0003700//DNA-binding transcription factor activity;GO:0005515//prot…	GO:0000122//negative regulation of transcription by RNA polymerase II;GO:0001822//kidney development;GO:0001889//liver development;GO:0001938//positive regulation of endothelial cell proliferation;GO:0001945//lymph vessel development;GO:0001946//lymphangiogenesis;GO:0002088//lens development in camera-type eye;GO:0002089//lens morphogenesis in camera-type eye;GO:0002194//hepatocyte cell migration…	HPD
ENSMUSG00000010529	2.14	1.651	2.092	4.066	4.314	4.56	18	13	18	34	40	36	Gm266	predicted gene 266 [Source:MGI Symbol;Acc:MGI:2685112]	-	-	-	-	GO:0005886//plasma membrane;GO:0016020//membrane	GO:0003924//GTPase activity;GO:0005525//GTP binding;GO:0019003//GDP binding	GO:0007165//signal transduction;GO:0030336//negative regulation of cell migration;GO:0032486//Rap protein signal transduction	--
ENSMUSG00000011171	4.1	3.603	3.756	0.515	0.62	0.682	96	79	90	12	16	15	Vipr2	vasoactive intestinal peptide receptor 2 [Source:MGI Symbol;Acc:MGI:107166]	Environmental Information Processing;Environmental Information Processing	Signaling molecules and interaction;Signal transduction	ko04080//Neuroactive ligand-receptor interaction;ko04024//cAMP signaling pathway	K04590;K04590	GO:0005886//plasma membrane;GO:0016020//membrane;GO:0016021//integral component of membrane	GO:0004888//transmembrane signaling receptor activity;GO:0004930//G protein-coupled receptor activity;GO:0004999//vasoactive intestinal polypeptide receptor activity;GO:0008528//G protein-coupled peptide receptor activity;GO:0017046//peptide hormone binding	GO:0007165//signal transduction;GO:0007166//cell surface receptor signaling pathway;GO:0007186//G protein-coupled receptor signaling pathway;GO:0007188//adenylate cyclase-modulating G protein-coupled receptor signaling pathway;GO:0007190//activation of adenylate cyclase activity;GO:0048662//negative regulation of smooth muscle cell proliferation	--
ENSMUSG00000011751	0.821	1.068	1.027	0.25	0.427	0.335	49	52	62.4	12	25	19	Sptbn4	spectrin beta, non-erythrocytic 4 [Source:MGI Symbol;Acc:MGI:1890574]	-	-	-	-	GO:0005737//cytoplasm;GO:0005856//cytoskeleton;GO:0005884//actin filament;GO:0005886//plasma membrane;GO:0005912//adherens junction;GO:0008091//spectrin;GO:0014704//intercalated disc;GO:0016020//membrane;GO:0016363//nuclear matrix;GO:0016605//PML body;GO:0030054//cell junction;GO:0030424//axon;GO:0030864//cortical actin cytoskeleton;GO:0033268//node of Ranvier;GO:0033270//paranode region of axon;…	GO:0003779//actin binding;GO:0005200//structural constituent of cytoskeleton;GO:0005515//protein binding;GO:0005543//phospholipid binding;GO:0019902//phosphatase binding;GO:0030506//ankyrin binding;GO:0030507//spectrin binding;GO:0051015//actin filament binding	GO:0002028//regulation of sodium ion transport;GO:0007409//axonogenesis;GO:0007605//sensory perception of sound;GO:0007628//adult walking behavior;GO:0008104//protein localization;GO:0009566//fertilization;GO:0010459//negative regulation of heart rate;GO:0019226//transmission of nerve impulse;GO:0021952//central nervous system projection neuron axonogenesis;GO:0022414//reproductive process;GO:003…	--
ENSMUSG00000013415	0.103	0.092	0.101	0.85	1.142	0.955	6	5	6	49	73	52	Igf2bp1	insulin-like growth factor 2 mRNA binding protein 1 [Source:MGI Symbol;Acc:MGI:1890357]	Human Diseases	Cancer: overview	ko05206//MicroRNAs in cancer	K17391	GO:0000932//P-body;GO:0005634//nucleus;GO:0005654//nucleoplasm;GO:0005737//cytoplasm;GO:0005829//cytosol;GO:0010494//cytoplasmic stress granule;GO:0030027//lamellipodium;GO:0030175//filopodium;GO:0030424//axon;GO:0030425//dendrite;GO:0030426//growth cone;GO:0042995//cell projection;GO:0043025//neuronal cell body;GO:0043197//dendritic spine;GO:0045202//synapse;GO:0048471//perinuclear region of cyt…	GO:0003676//nucleic acid binding;GO:0003723//RNA binding;GO:0003729//mRNA binding;GO:0003730//mRNA 3'-UTR binding;GO:0045182//translation regulator activity;GO:0048027//mRNA 5'-UTR binding;GO:1990247//N6-methyladenosine-containing RNA binding	GO:0006403//RNA localization;GO:0006417//regulation of translation;GO:0007399//nervous system development;GO:0010468//regulation of gene expression;GO:0010610//regulation of mRNA stability involved in response to stress;GO:0017148//negative regulation of translation;GO:0022013//pallium cell proliferation in forebrain;GO:0051028//mRNA transport;GO:0051252//regulation of RNA metabolic process;GO:00…	--
ENSMUSG00000013539	40.045	40.499	39.174	9.665	13.025	13.26	420	381	414	106	152	137	Tango2	transport and golgi organization 2 [Source:MGI Symbol;Acc:MGI:101825]	-	-	-	-	GO:0005737//cytoplasm;GO:0005739//mitochondrion;GO:0005794//Golgi apparatus;GO:0005829//cytosol	-	-	--
ENSMUSG00000013846	9.306	8.157	9.853	4.676	5.011	3.968	319.17	303	400	171	180	141	St3gal1	ST3 beta-galactoside alpha-2,3-sialyltransferase 1 [Source:MGI Symbol;Acc:MGI:98304]	Metabolism;Metabolism;Metabolism;Metabolism;Metabolism	Global and overview maps;Glycan biosynthesis and metabolism;Glycan biosynthesis and metabolism;Glycan biosynthesis and metabolism;Glycan biosynthesis and metabolism	ko01100//Metabolic pathways;ko00512//Mucin type O-glycan biosynthesis;ko00603//Glycosphingolipid biosynthesis - globo and isoglobo series;ko00604//Glycosphingolipid biosynthesis - ganglio series;ko00533//Glycosaminoglycan biosynthesis - keratan sulfate	K00780;K00780;K00780;K00780;K00780	GO:0005576//extracellular region;GO:0005794//Golgi apparatus;GO:0016020//membrane;GO:0032580//Golgi cisterna membrane;GO:0032588//trans-Golgi network membrane;GO:1990675//Golgi medial cisterna membrane;GO:1990676//Golgi trans cisterna membrane	GO:0003836//beta-galactoside (CMP) alpha-2,3-sialyltransferase activity;GO:0008373//sialyltransferase activity;GO:0016740//transferase activity;GO:0016757//glycosyltransferase activity;GO:0047288//monosialoganglioside sialyltransferase activity	GO:0002319//memory B cell differentiation;GO:0006054//N-acetylneuraminate metabolic process;GO:0006468//protein phosphorylation;GO:0006486//protein glycosylation;GO:0006487//protein N-linked glycosylation;GO:0006629//lipid metabolic process;GO:0010706//ganglioside biosynthetic process via lactosylceramide;GO:0097503//sialylation;GO:1905403//negative regulation of activated CD8-positive, alpha-bet…	--
ENSMUSG00000014158	2.642	1.674	2.276	0.652	0.609	0.573	59	35	52	12	15	12	Trpv4	transient receptor potential cation channel, subfamily V, member 4 [Source:MGI Symbol;Acc:MGI:1926945]	Cellular Processes;Human Diseases;Organismal Systems	Cell growth and death;Cardiovascular disease;Sensory system	ko04218//Cellular senescence;ko05418//Fluid shear stress and atherosclerosis;ko04750//Inflammatory mediator regulation of TRP channels	K04973;K04973;K04973	GO:0005881//cytoplasmic microtubule;GO:0005886//plasma membrane;GO:0005912//adherens junction;GO:0005925//focal adhesion;GO:0005929//cilium;GO:0009986//cell surface;GO:0016020//membrane;GO:0016021//integral component of membrane;GO:0016324//apical plasma membrane;GO:0030027//lamellipodium;GO:0030175//filopodium;GO:0030426//growth cone;GO:0030864//cortical actin cytoskeleton;GO:0031410//cytoplasmi…	GO:0000166//nucleotide binding;GO:0003779//actin binding;GO:0005034//osmosensor activity;GO:0005080//protein kinase C binding;GO:0005216//ion channel activity;GO:0005261//cation channel activity;GO:0005262//calcium channel activity;GO:0005515//protein binding;GO:0005516//calmodulin binding;GO:0005524//ATP binding;GO:0008017//microtubule binding;GO:0008289//lipid binding;GO:0015275//stretch-activa…	GO:0000122//negative regulation of transcription by RNA polymerase II;GO:0002024//diet induced thermogenesis;GO:0006811//ion transport;GO:0006816//calcium ion transport;GO:0006874//cellular calcium ion homeostasis;GO:0006970//response to osmotic stress;GO:0006971//hypotonic response;GO:0007015//actin filament organization;GO:0007043//cell-cell junction assembly;GO:0007204//positive regulation of …	--
ENSMUSG00000014361	5.071	6.026	5.58	22.865	21.382	22.216	151	168	170	677	702	621	Mertk	MER proto-oncogene tyrosine kinase [Source:MGI Symbol;Acc:MGI:96965]	-	-	-	-	GO:0001750//photoreceptor outer segment;GO:0005615//extracellular space;GO:0005737//cytoplasm;GO:0005886//plasma membrane;GO:0016020//membrane;GO:0043235//receptor complex	GO:0000166//nucleotide binding;GO:0004672//protein kinase activity;GO:0004713//protein tyrosine kinase activity;GO:0004714//transmembrane receptor protein tyrosine kinase activity;GO:0005515//protein binding;GO:0005524//ATP binding;GO:0016301//kinase activity;GO:0016740//transferase activity	GO:0001779//natural killer cell differentiation;GO:0001818//negative regulation of cytokine production;GO:0006468//protein phosphorylation;GO:0006909//phagocytosis;GO:0007169//transmembrane receptor protein tyrosine kinase signaling pathway;GO:0007283//spermatogenesis;GO:0007399//nervous system development;GO:0016310//phosphorylation;GO:0016477//cell migration;GO:0018108//peptidyl-tyrosine phosph…	--
ENSMUSG00000014444	1.519	1.813	1.846	5.555	5.319	5.588	81.33	88.33	97.49	296.41	317.03	275.28	Piezo1	piezo-type mechanosensitive ion channel component 1 [Source:MGI Symbol;Acc:MGI:3603204]	-	-	-	-	GO:0005783//endoplasmic reticulum;GO:0016020//membrane;GO:0016021//integral component of membrane	GO:0008381//mechanosensitive ion channel activity	GO:0006811//ion transport;GO:0010831//positive regulation of myotube differentiation;GO:0033625//positive regulation of integrin activation;GO:0033634//positive regulation of cell-cell adhesion mediated by integrin;GO:0034220//ion transmembrane transport	--
ENSMUSG00000015085	9.855	10.048	10.362	3.98	2.912	4.136	132	126	142	53	43	52	Entpd2	ectonucleoside triphosphate diphosphohydrolase 2 [Source:MGI Symbol;Acc:MGI:1096863]	Metabolism;Metabolism;Organismal Systems	Global and overview maps;Nucleotide metabolism;Sensory system	ko01100//Metabolic pathways;ko00230//Purine metabolism;ko04742//Taste transduction	K01509;K01509;K01509	GO:0005604//basement membrane;GO:0005886//plasma membrane;GO:0009986//cell surface;GO:0016020//membrane;GO:0031253//cell projection membrane;GO:0044297//cell body	GO:0000166//nucleotide binding;GO:0004382//guanosine-diphosphatase activity;GO:0005515//protein binding;GO:0005524//ATP binding;GO:0016462//pyrophosphatase activity;GO:0016787//hydrolase activity;GO:0016887//ATP hydrolysis activity;GO:0017110//nucleoside-diphosphatase activity;GO:0017111//nucleoside-triphosphatase activity;GO:0042802//identical protein binding;GO:0043262//adenosine-diphosphatase …	GO:0007186//G protein-coupled receptor signaling pathway;GO:0009134//nucleoside diphosphate catabolic process;GO:0009181//purine ribonucleoside diphosphate catabolic process;GO:0030168//platelet activation;GO:0071354//cellular response to interleukin-6	--
ENSMUSG00000015133	2.477	2.604	2.459	0.812	0.878	0.948	128	126	130	40	50	46	Lrrk1	leucine-rich repeat kinase 1 [Source:MGI Symbol;Acc:MGI:2142227]	-	-	-	-	GO:0005737//cytoplasm;GO:0005739//mitochondrion;GO:0005829//cytosol	GO:0000166//nucleotide binding;GO:0004672//protein kinase activity;GO:0004674//protein serine/threonine kinase activity;GO:0005515//protein binding;GO:0005524//ATP binding;GO:0005525//GTP binding;GO:0016301//kinase activity;GO:0016740//transferase activity;GO:0042802//identical protein binding;GO:0046872//metal ion binding;GO:0106310//protein serine kinase activity	GO:0006468//protein phosphorylation;GO:0007165//signal transduction;GO:0009966//regulation of signal transduction;GO:0016310//phosphorylation;GO:0018108//peptidyl-tyrosine phosphorylation;GO:0035556//intracellular signal transduction;GO:0036035//osteoclast development;GO:0045453//bone resorption;GO:0050731//positive regulation of peptidyl-tyrosine phosphorylation;GO:0050732//negative regulation o…	--
ENSMUSG00000015134	0	0.207	0.343	1.7	1.634	1.363	0	2.01	5.01	26.02	34.01	22.03	Aldh1a3	aldehyde dehydrogenase family 1, subfamily A3 [Source:MGI Symbol;Acc:MGI:1861722]	Metabolism;Metabolism	Global and overview maps;Metabolism of cofactors and vitamins	ko01100//Metabolic pathways;ko00830//Retinol metabolism	K07249;K07249	GO:0005737//cytoplasm	GO:0001758//retinal dehydrogenase activity;GO:0004028//3-chloroallyl aldehyde dehydrogenase activity;GO:0004029//aldehyde dehydrogenase (NAD+) activity;GO:0004030//aldehyde dehydrogenase [NAD(P)+] activity;GO:0016491//oxidoreductase activity;GO:0016620//oxidoreductase activity, acting on the aldehyde or oxo group of donors, NAD or NADP as acceptor;GO:0042803//protein homodimerization activity;GO:…	GO:0002072//optic cup morphogenesis involved in camera-type eye development;GO:0002138//retinoic acid biosynthetic process;GO:0006081//cellular aldehyde metabolic process;GO:0006629//lipid metabolic process;GO:0006915//apoptotic process;GO:0007626//locomotory behavior;GO:0021768//nucleus accumbens development;GO:0031076//embryonic camera-type eye development;GO:0042472//inner ear morphogenesis;GO…	--
ENSMUSG00000015354	13.64	11.821	11.963	1.899	1.801	1.873	419	340	376	58	61	54	Pcolce2	procollagen C-endopeptidase enhancer 2 [Source:MGI Symbol;Acc:MGI:1923727]	-	-	-	-	GO:0005576//extracellular region;GO:0062023//collagen-containing extracellular matrix	GO:0005201//extracellular matrix structural constituent;GO:0005515//protein binding;GO:0005518//collagen binding;GO:0008201//heparin binding;GO:0016504//peptidase activator activity	GO:1990830//cellular response to leukemia inhibitory factor	--
ENSMUSG00000015396	0	0.062	0.228	0.352	0.529	0.559	0	1	4	6	10	9	Cd83	CD83 antigen [Source:MGI Symbol;Acc:MGI:1328316]	-	-	-	-	GO:0009897//external side of plasma membrane;GO:0016020//membrane	-	GO:0014070//response to organic cyclic compound;GO:0032713//negative regulation of interleukin-4 production;GO:0032733//positive regulation of interleukin-10 production;GO:0032743//positive regulation of interleukin-2 production;GO:0043367//CD4-positive, alpha-beta T cell differentiation;GO:0043372//positive regulation of CD4-positive, alpha-beta T cell differentiation	--
ENSMUSG00000015484	1.34	1.033	1.2	0.262	0.338	0.119	36	26	33	7	10	3	Fam163a	family with sequence similarity 163, member A [Source:MGI Symbol;Acc:MGI:3618859]	-	-	-	-	GO:0005575//cellular_component;GO:0016020//membrane	GO:0003674//molecular_function	GO:0008150//biological_process	--
ENSMUSG00000015619	0.045	0.096	0	0.226	0.53	0.383	1	2	0	5	13	8	Gata3	GATA binding protein 3 [Source:MGI Symbol;Acc:MGI:95663]	Organismal Systems;Organismal Systems;Organismal Systems;Human Diseases	Endocrine system;Immune system;Immune system;Immune disease	ko04928//Parathyroid hormone synthesis, secretion and action;ko04659//Th17 cell differentiation;ko04658//Th1 and Th2 cell differentiation;ko05321//Inflammatory bowel disease	K17895;K17895;K17895;K17895	GO:0000785//chromatin;GO:0005634//nucleus;GO:0005654//nucleoplasm;GO:0043229//intracellular organelle	GO:0000976//transcription cis-regulatory region binding;GO:0000977//RNA polymerase II transcription regulatory region sequence-specific DNA binding;GO:0000978//RNA polymerase II cis-regulatory region sequence-specific DNA binding;GO:0000981//DNA-binding transcription factor activity, RNA polymerase II-specific;GO:0000987//cis-regulatory region sequence-specific DNA binding;GO:0001223//transcripti…	GO:0000122//negative regulation of transcription by RNA polymerase II;GO:0000902//cell morphogenesis;GO:0001701//in utero embryonic development;GO:0001709//cell fate determination;GO:0001764//neuron migration;GO:0001806//type IV hypersensitivity;GO:0001817//regulation of cytokine production;GO:0001819//positive regulation of cytokine production;GO:0001822//kidney development;GO:0001823//mesonephr…	zf-GATA
ENSMUSG00000015879	3.138	3.133	3.2	0.24	0.526	0.182	92	86	96	7	17	5	Fam184b	family with sequence similarity 184, member B [Source:MGI Symbol;Acc:MGI:2442958]	-	-	-	-	GO:0005575//cellular_component	GO:0003674//molecular_function	GO:0008150//biological_process	--
ENSMUSG00000015968	9.333	8.991	7.856	1.239	1.328	1.574	508.39	480.25	455.95	73	86	82	Cacna1d	calcium channel, voltage-dependent, L type, alpha 1D subunit [Source:MGI Symbol;Acc:MGI:88293]	Human Diseases;Human Diseases;Environmental Information Processing;Environmental Information Processing;Human Diseases;Environmental Information Processing;Human Diseases;Human Diseases;Cellular Processes;Environmental Information Processing;Cellular Processes;Human Diseases;Organismal Systems;Organismal Systems;Organismal Systems;Organismal Systems;Organismal Systems;Organismal Systems;Organisma…	Neurodegenerative disease;Neurodegenerative disease;Signal transduction;Signal transduction;Neurodegenerative disease;Signal transduction;Cancer: overview;Cardiovascular disease;Cell growth and death;Signal transduction;Cellular community - eukaryotes;Endocrine and metabolic disease;Endocrine system;Nervous system;Circulatory system;Circulatory system;Nervous system;Nervous system;Endocrine syste…	ko05022//Pathways of neurodegeneration - multiple diseases;ko05010//Alzheimer disease;ko04020//Calcium signaling pathway;ko04010//MAPK signaling pathway;ko05020//Prion disease;ko04024//cAMP signaling pathway;ko05207//Chemical carcinogenesis - receptor activation;ko05414//Dilated cardiomyopathy;ko04218//Cellular senescence;ko04022//cGMP-PKG signaling pathway;ko04530//Tight junction;ko04934//Cushin…	K04851;K04851;K04851;K04851;K04851;K04851;K04851;K04851;K04851;K04851;K04851;K04851;K04851;K04851;K04851;K04851;K04851;K04851;K04851;K04851;K04851;K04851;K04851;K04851;K04851;K04851;K04851;K04851;K04851;K04851;K04851;K04851;K04851;K04851;K04851;K04851	GO:0005634//nucleus;GO:0005737//cytoplasm;GO:0005886//plasma membrane;GO:0005891//voltage-gated calcium channel complex;GO:0009986//cell surface;GO:0016020//membrane;GO:0016324//apical plasma membrane;GO:0030018//Z disc;GO:0032590//dendrite membrane;GO:0042383//sarcolemma;GO:0043204//perikaryon;GO:0048787//presynaptic active zone membrane;GO:0098683//cochlear hair cell ribbon synapse;GO:0150001//…	GO:0005216//ion channel activity;GO:0005244//voltage-gated ion channel activity;GO:0005245//voltage-gated calcium channel activity;GO:0005262//calcium channel activity;GO:0005515//protein binding;GO:0008331//high voltage-gated calcium channel activity;GO:0030165//PDZ domain binding;GO:0030506//ankyrin binding;GO:0046872//metal ion binding;GO:0051393//alpha-actinin binding;GO:0086059//voltage-gate…	GO:0003008//system process;GO:0006811//ion transport;GO:0006816//calcium ion transport;GO:0007188//adenylate cyclase-modulating G protein-coupled receptor signaling pathway;GO:0007605//sensory perception of sound;GO:0019722//calcium-mediated signaling;GO:0030001//metal ion transport;GO:0032793//positive regulation of CREB transcription factor activity;GO:0034220//ion transmembrane transport;GO:00…	--
ENSMUSG00000015981	28.023	28.829	28.663	4.499	5.047	3.28	420	412	443	67	83	45	Stk32c	serine/threonine kinase 32C [Source:MGI Symbol;Acc:MGI:2385336]	-	-	-	-	-	GO:0000166//nucleotide binding;GO:0004672//protein kinase activity;GO:0004674//protein serine/threonine kinase activity;GO:0005524//ATP binding;GO:0016301//kinase activity;GO:0016740//transferase activity;GO:0046872//metal ion binding;GO:0106310//protein serine kinase activity	GO:0006468//protein phosphorylation;GO:0016310//phosphorylation;GO:0018105//peptidyl-serine phosphorylation;GO:0035556//intracellular signal transduction	--
ENSMUSG00000016087	0	0	0.043	0.131	0.158	0.464	0	0	1	3	4	10	Fli1	Friend leukemia integration 1 [Source:MGI Symbol;Acc:MGI:95554]	Human Diseases	Cancer: overview	ko05202//Transcriptional misregulation in cancer	K09436	GO:0005634//nucleus;GO:0005654//nucleoplasm;GO:0005829//cytosol;GO:0016604//nuclear body	GO:0000976//transcription cis-regulatory region binding;GO:0000978//RNA polymerase II cis-regulatory region sequence-specific DNA binding;GO:0000981//DNA-binding transcription factor activity, RNA polymerase II-specific;GO:0001228//DNA-binding transcription activator activity, RNA polymerase II-specific;GO:0003677//DNA binding;GO:0003682//chromatin binding;GO:0003700//DNA-binding transcription fa…	GO:0006355//regulation of transcription, DNA-templated;GO:0006357//regulation of transcription by RNA polymerase II;GO:0008015//blood circulation;GO:0009887//animal organ morphogenesis;GO:0030154//cell differentiation;GO:0035855//megakaryocyte development;GO:0045893//positive regulation of transcription, DNA-templated;GO:0045944//positive regulation of transcription by RNA polymerase II	ETS
ENSMUSG00000016150	0.383	0.515	0.55	0.122	0.153	0.167	34	43	50	10.8	15	12	Tenm1	teneurin transmembrane protein 1 [Source:MGI Symbol;Acc:MGI:1345185]	-	-	-	-	GO:0005576//extracellular region;GO:0005634//nucleus;GO:0005737//cytoplasm;GO:0005783//endoplasmic reticulum;GO:0005794//Golgi apparatus;GO:0005856//cytoskeleton;GO:0005886//plasma membrane;GO:0016020//membrane;GO:0016021//integral component of membrane;GO:0016363//nuclear matrix;GO:0016607//nuclear speck;GO:0043005//neuron projection	GO:0005515//protein binding;GO:0042802//identical protein binding;GO:0042803//protein homodimerization activity;GO:0046982//protein heterodimerization activity;GO:0050839//cell adhesion molecule binding	GO:0007157//heterophilic cell-cell adhesion via plasma membrane cell adhesion molecules;GO:0007165//signal transduction;GO:0007218//neuropeptide signaling pathway;GO:0048666//neuron development;GO:0090316//positive regulation of intracellular protein transport	--
ENSMUSG00000016200	7.356	7.955	7.786	3.558	3.427	3.413	403	393	437	193	207	178	Syt14	synaptotagmin XIV [Source:MGI Symbol;Acc:MGI:2444490]	-	-	-	-	GO:0016020//membrane	GO:0005515//protein binding;GO:0005543//phospholipid binding;GO:0042802//identical protein binding	-	--
ENSMUSG00000016346	8.35	7.403	8.025	0.968	1.256	1.073	430	361	408	54	77	56	Kcnq2	potassium voltage-gated channel, subfamily Q, member 2 [Source:MGI Symbol;Acc:MGI:1309503]	Organismal Systems	Nervous system	ko04725//Cholinergic synapse	K04927	GO:0005886//plasma membrane;GO:0008076//voltage-gated potassium channel complex;GO:0016020//membrane	GO:0005216//ion channel activity;GO:0005244//voltage-gated ion channel activity;GO:0005249//voltage-gated potassium channel activity;GO:0005267//potassium channel activity;GO:0005516//calmodulin binding;GO:0015075//ion transmembrane transporter activity;GO:0030506//ankyrin binding	GO:0006811//ion transport;GO:0006813//potassium ion transport;GO:0034765//regulation of ion transmembrane transport;GO:0055085//transmembrane transport;GO:0071805//potassium ion transmembrane transport	--
ENSMUSG00000016349	6.724	6.442	6.843	0.558	0.566	0.369	97	87	101	8	9	5	Eef1a2	eukaryotic translation elongation factor 1 alpha 2 [Source:MGI Symbol;Acc:MGI:1096317]	Human Diseases;Genetic Information Processing;Human Diseases	Infectious disease: parasitic;Translation;Infectious disease: bacterial	ko05140//Leishmaniasis;ko03013//Nucleocytoplasmic transport;ko05134//Legionellosis	K03231;K03231;K03231	GO:0005634//nucleus;GO:0005737//cytoplasm;GO:0005853//eukaryotic translation elongation factor 1 complex;GO:0043025//neuronal cell body;GO:0043209//myelin sheath;GO:0045202//synapse;GO:0110165//cellular anatomical entity	GO:0000166//nucleotide binding;GO:0003746//translation elongation factor activity;GO:0003924//GTPase activity;GO:0005525//GTP binding;GO:0019901//protein kinase binding	GO:0006412//translation;GO:0006414//translational elongation;GO:0043065//positive regulation of apoptotic process;GO:0090218//positive regulation of lipid kinase activity	--
ENSMUSG00000017400	0.616	0.561	0.185	1	0.73	1.563	13	2	4	21	17	23	Stac2	SH3 and cysteine rich domain 2 [Source:MGI Symbol;Acc:MGI:2144518]	-	-	-	-	GO:0005737//cytoplasm;GO:0005829//cytosol;GO:0005886//plasma membrane;GO:0016020//membrane;GO:0031234//extrinsic component of cytoplasmic side of plasma membrane;GO:0042383//sarcolemma	GO:0003674//molecular_function;GO:0005515//protein binding;GO:0046872//metal ion binding	GO:0003009//skeletal muscle contraction;GO:1901387//positive regulation of voltage-gated calcium channel activity;GO:1903078//positive regulation of protein localization to plasma membrane	--
ENSMUSG00000017412	8.606	7.826	6.962	2.702	2.284	2.865	472	401	391	147	140	147	Cacnb4	calcium channel, voltage-dependent, beta 4 subunit [Source:MGI Symbol;Acc:MGI:103301]	Environmental Information Processing;Human Diseases;Organismal Systems;Organismal Systems;Human Diseases;Organismal Systems;Human Diseases	Signal transduction;Cardiovascular disease;Endocrine system;Circulatory system;Cardiovascular disease;Circulatory system;Cardiovascular disease	ko04010//MAPK signaling pathway;ko05414//Dilated cardiomyopathy;ko04921//Oxytocin signaling pathway;ko04261//Adrenergic signaling in cardiomyocytes;ko05410//Hypertrophic cardiomyopathy;ko04260//Cardiac muscle contraction;ko05412//Arrhythmogenic right ventricular cardiomyopathy	K04865;K04865;K04865;K04865;K04865;K04865;K04865	GO:0005730//nucleolus;GO:0005737//cytoplasm;GO:0005886//plasma membrane;GO:0005891//voltage-gated calcium channel complex;GO:0016607//nuclear speck;GO:0045202//synapse;GO:0098793//presynapse;GO:0098978//glutamatergic synapse;GO:0110165//cellular anatomical entity	GO:0005244//voltage-gated ion channel activity;GO:0005245//voltage-gated calcium channel activity;GO:0005262//calcium channel activity;GO:0005515//protein binding;GO:0008331//high voltage-gated calcium channel activity;GO:0019901//protein kinase binding;GO:0099626//voltage-gated calcium channel activity involved in regulation of presynaptic cytosolic calcium levels	GO:0006811//ion transport;GO:0006816//calcium ion transport;GO:0007214//gamma-aminobutyric acid signaling pathway;GO:0007268//chemical synaptic transmission;GO:0007528//neuromuscular junction development;GO:0007628//adult walking behavior;GO:0008285//negative regulation of cell population proliferation;GO:0014051//gamma-aminobutyric acid secretion;GO:0019227//neuronal action potential propagation…	--
ENSMUSG00000017491	25.026	22.934	23.34	11.469	12.308	10.88	409.54	417.65	383.03	182.42	209.58	182.78	Rarb	retinoic acid receptor, beta [Source:MGI Symbol;Acc:MGI:97857]	Human Diseases;Human Diseases;Human Diseases;Human Diseases	Cancer: overview;Cancer: specific types;Cancer: specific types;Cancer: specific types	ko05200//Pathways in cancer;ko05226//Gastric cancer;ko05222//Small cell lung cancer;ko05223//Non-small cell lung cancer	K08528;K08528;K08528;K08528	GO:0005634//nucleus;GO:0005654//nucleoplasm;GO:0005737//cytoplasm	GO:0000978//RNA polymerase II cis-regulatory region sequence-specific DNA binding;GO:0003677//DNA binding;GO:0003700//DNA-binding transcription factor activity;GO:0004879//nuclear receptor activity;GO:0005515//protein binding;GO:0008270//zinc ion binding;GO:0043565//sequence-specific DNA binding;GO:0044877//protein-containing complex binding;GO:0046872//metal ion binding;GO:0046965//retinoid X re…	GO:0000122//negative regulation of transcription by RNA polymerase II;GO:0001657//ureteric bud development;GO:0002068//glandular epithelial cell development;GO:0003417//growth plate cartilage development;GO:0006351//transcription, DNA-templated;GO:0006355//regulation of transcription, DNA-templated;GO:0006915//apoptotic process;GO:0008283//cell population proliferation;GO:0009755//hormone-mediate…	THR-like
ENSMUSG00000017631	90.184	85.403	92.898	36.026	38.244	38.399	2841	2673	2931	1240	1374	1230	Abr	active BCR-related gene [Source:MGI Symbol;Acc:MGI:107771]	-	-	-	-	GO:0005829//cytosol;GO:0005886//plasma membrane;GO:0016020//membrane;GO:0030424//axon;GO:0042995//cell projection;GO:0043197//dendritic spine;GO:0045202//synapse;GO:0098685//Schaffer collateral - CA1 synapse;GO:0098978//glutamatergic synapse;GO:0099092//postsynaptic density, intracellular component	GO:0004674//protein serine/threonine kinase activity;GO:0005085//guanyl-nucleotide exchange factor activity;GO:0005096//GTPase activator activity	GO:0002692//negative regulation of cellular extravasation;GO:0006468//protein phosphorylation;GO:0006909//phagocytosis;GO:0007165//signal transduction;GO:0007420//brain development;GO:0016477//cell migration;GO:0030036//actin cytoskeleton organization;GO:0032496//response to lipopolysaccharide;GO:0035556//intracellular signal transduction;GO:0042472//inner ear morphogenesis;GO:0043114//regulation…	--
ENSMUSG00000017639	31.383	31.547	32.952	3.228	4.074	3.23	1386	1255	1403	159	192	131	Rab11fip4	RAB11 family interacting protein 4 (class II) [Source:MGI Symbol;Acc:MGI:2442920]	Cellular Processes	Transport and catabolism	ko04144//Endocytosis	K12485	GO:0005768//endosome;GO:0016020//membrane;GO:0030139//endocytic vesicle;GO:0030496//midbody;GO:0031410//cytoplasmic vesicle;GO:0032154//cleavage furrow;GO:0055038//recycling endosome membrane	GO:0005509//calcium ion binding;GO:0031267//small GTPase binding;GO:0042803//protein homodimerization activity;GO:0046872//metal ion binding	GO:0007049//cell cycle;GO:0032456//endocytic recycling;GO:0032465//regulation of cytokinesis;GO:0051301//cell division	--
ENSMUSG00000017724	3.329	2.617	2.421	65.766	65.754	65.417	55	40	41	1082	1199	1016	Etv4	ets variant 4 [Source:MGI Symbol;Acc:MGI:99423]	Human Diseases	Cancer: overview	ko05202//Transcriptional misregulation in cancer	K15592	GO:0005634//nucleus;GO:0005694//chromosome;GO:0005730//nucleolus	GO:0000978//RNA polymerase II cis-regulatory region sequence-specific DNA binding;GO:0000981//DNA-binding transcription factor activity, RNA polymerase II-specific;GO:0001228//DNA-binding transcription activator activity, RNA polymerase II-specific;GO:0003677//DNA binding;GO:0003700//DNA-binding transcription factor activity;GO:0043565//sequence-specific DNA binding;GO:1990837//sequence-specific …	GO:0006355//regulation of transcription, DNA-templated;GO:0006357//regulation of transcription by RNA polymerase II;GO:0006366//transcription by RNA polymerase II;GO:0008045//motor neuron axon guidance;GO:0010628//positive regulation of gene expression;GO:0030154//cell differentiation;GO:0033600//negative regulation of mammary gland epithelial cell proliferation;GO:0045618//positive regulation of…	ETS
ENSMUSG00000017740	0.66	0.664	0.868	2.535	2.09	2.093	26	23	23	74	77	71	Slc12a5	solute carrier family 12, member 5 [Source:MGI Symbol;Acc:MGI:1862037]	Organismal Systems	Nervous system	ko04727//GABAergic synapse	K23967	GO:0005886//plasma membrane;GO:0005887//integral component of plasma membrane;GO:0016020//membrane;GO:0016021//integral component of membrane;GO:0030425//dendrite;GO:0032590//dendrite membrane;GO:0042995//cell projection;GO:0043005//neuron projection;GO:0043025//neuronal cell body;GO:0043204//perikaryon;GO:0045202//synapse;GO:0071944//cell periphery	GO:0008519//ammonium transmembrane transporter activity;GO:0015108//chloride transmembrane transporter activity;GO:0015293//symporter activity;GO:0015377//cation:chloride symporter activity;GO:0015379//potassium:chloride symporter activity;GO:0019901//protein kinase binding;GO:0022857//transmembrane transporter activity	GO:0006811//ion transport;GO:0006813//potassium ion transport;GO:0006821//chloride transport;GO:0006873//cellular ion homeostasis;GO:0006884//cell volume homeostasis;GO:0006971//hypotonic response;GO:0007268//chemical synaptic transmission;GO:0007612//learning;GO:0009410//response to xenobiotic stimulus;GO:0030644//cellular chloride ion homeostasis;GO:0035264//multicellular organism growth;GO:004…	--
ENSMUSG00000017754	22.802	28.076	28.092	11.043	11.484	12.803	293.87	341.2	362.32	142.28	162.65	155.11	Pltp	phospholipid transfer protein [Source:MGI Symbol;Acc:MGI:103151]	Organismal Systems;Organismal Systems	Endocrine system;Digestive system	ko03320//PPAR signaling pathway;ko04979//Cholesterol metabolism	K08761;K08761	GO:0005576//extracellular region;GO:0005615//extracellular space;GO:0005634//nucleus;GO:0034364//high-density lipoprotein particle	GO:0008035//high-density lipoprotein particle binding;GO:0008289//lipid binding;GO:0008429//phosphatidylethanolamine binding;GO:0008525//phosphatidylcholine transporter activity;GO:0008526//phosphatidylinositol transfer activity;GO:0019992//diacylglycerol binding;GO:0030169//low-density lipoprotein particle binding;GO:0031210//phosphatidylcholine binding;GO:0034189//very-low-density lipoprotein p…	GO:0006629//lipid metabolic process;GO:0006869//lipid transport;GO:0010189//vitamin E biosynthetic process;GO:0010875//positive regulation of cholesterol efflux;GO:0015914//phospholipid transport;GO:0015918//sterol transport;GO:0030317//flagellated sperm motility;GO:0034375//high-density lipoprotein particle remodeling;GO:0035627//ceramide transport;GO:0046836//glycolipid transport;GO:0120009//in…	--
ENSMUSG00000017897	28.339	29.764	28.967	4.038	3.963	3.648	480	472	502	68	74	58	Eya2	EYA transcriptional coactivator and phosphatase 2 [Source:MGI Symbol;Acc:MGI:109341]	-	-	-	-	GO:0005634//nucleus;GO:0005737//cytoplasm;GO:0005739//mitochondrion;GO:0005829//cytosol	GO:0000287//magnesium ion binding;GO:0004721//phosphoprotein phosphatase activity;GO:0004725//protein tyrosine phosphatase activity;GO:0005515//protein binding;GO:0016787//hydrolase activity;GO:0046872//metal ion binding	GO:0006281//DNA repair;GO:0006325//chromatin organization;GO:0006470//protein dephosphorylation;GO:0006974//cellular response to DNA damage stimulus;GO:0007275//multicellular organism development;GO:0014706//striated muscle tissue development;GO:0016570//histone modification;GO:0030154//cell differentiation;GO:0045739//positive regulation of DNA repair;GO:0048856//anatomical structure development…	--
ENSMUSG00000018166	1.897	1.924	1.878	0.242	0.131	0.256	79	75	80	10	6	10	Erbb3	erb-b2 receptor tyrosine kinase 3 [Source:MGI Symbol;Acc:MGI:95411]	Environmental Information Processing;Environmental Information Processing;Environmental Information Processing;Human Diseases;Human Diseases;Environmental Information Processing;Human Diseases	Signal transduction;Signal transduction;Signal transduction;Cancer: overview;Cancer: overview;Signal transduction;Drug resistance: antineoplastic	ko04151//PI3K-Akt signaling pathway;ko04020//Calcium signaling pathway;ko04010//MAPK signaling pathway;ko05205//Proteoglycans in cancer;ko05206//MicroRNAs in cancer;ko04012//ErbB signaling pathway;ko01521//EGFR tyrosine kinase inhibitor resistance	K05084;K05084;K05084;K05084;K05084;K05084;K05084	GO:0005615//extracellular space;GO:0005634//nucleus;GO:0005886//plasma membrane;GO:0009925//basal plasma membrane;GO:0016020//membrane;GO:0016021//integral component of membrane;GO:0016323//basolateral plasma membrane;GO:0016324//apical plasma membrane;GO:0016328//lateral plasma membrane;GO:0038143//ERBB3:ERBB2 complex;GO:0043235//receptor complex;GO:0045211//postsynaptic membrane;GO:0098590//pla…	GO:0000166//nucleotide binding;GO:0004672//protein kinase activity;GO:0004713//protein tyrosine kinase activity;GO:0004888//transmembrane signaling receptor activity;GO:0005515//protein binding;GO:0005524//ATP binding;GO:0016301//kinase activity;GO:0016740//transferase activity;GO:0019838//growth factor binding;GO:0030296//protein tyrosine kinase activator activity;GO:0031625//ubiquitin protein l…	GO:0003197//endocardial cushion development;GO:0006468//protein phosphorylation;GO:0007162//negative regulation of cell adhesion;GO:0007165//signal transduction;GO:0007169//transmembrane receptor protein tyrosine kinase signaling pathway;GO:0007173//epidermal growth factor receptor signaling pathway;GO:0007399//nervous system development;GO:0007422//peripheral nervous system development;GO:000828…	--
ENSMUSG00000018411	226.397	224.301	239.361	77.573	80.281	79.088	7060	6556	7161	2574	2891	2414	Mapt	microtubule-associated protein tau [Source:MGI Symbol;Acc:MGI:97180]	Human Diseases;Human Diseases;Environmental Information Processing;Human Diseases	Neurodegenerative disease;Neurodegenerative disease;Signal transduction;Neurodegenerative disease	ko05022//Pathways of neurodegeneration - multiple diseases;ko05010//Alzheimer disease;ko04010//MAPK signaling pathway;ko05012//Parkinson disease	K04380;K04380;K04380;K04380	GO:0005576//extracellular region;GO:0005634//nucleus;GO:0005737//cytoplasm;GO:0005829//cytosol;GO:0005856//cytoskeleton;GO:0005874//microtubule;GO:0005886//plasma membrane;GO:0005930//axoneme;GO:0009898//cytoplasmic side of plasma membrane;GO:0014069//postsynaptic density;GO:0015630//microtubule cytoskeleton;GO:0016020//membrane;GO:0016607//nuclear speck;GO:0030424//axon;GO:0030425//dendrite;GO:0…	GO:0003677//DNA binding;GO:0005515//protein binding;GO:0008017//microtubule binding;GO:0015631//tubulin binding;GO:0017124//SH3 domain binding;GO:0019899//enzyme binding;GO:0019901//protein kinase binding;GO:0031072//heat shock protein binding;GO:0034185//apolipoprotein binding;GO:0042802//identical protein binding;GO:0044877//protein-containing complex binding;GO:0051087//chaperone binding;GO:00…	GO:0000226//microtubule cytoskeleton organization;GO:0001764//neuron migration;GO:0006915//apoptotic process;GO:0007409//axonogenesis;GO:0007416//synapse assembly;GO:0007584//response to nutrient;GO:0007611//learning or memory;GO:0007613//memory;GO:0007628//adult walking behavior;GO:0008088//axo-dendritic transport;GO:0008631//intrinsic apoptotic signaling pathway in response to oxidative stress;…	--
ENSMUSG00000018474	149.487	142.396	154.7	11.488	13.1	10.692	5331	4892	5396	400	439	359	Chd3	chromodomain helicase DNA binding protein 3 [Source:MGI Symbol;Acc:MGI:1344395]	-	-	-	-	GO:0000785//chromatin;GO:0005634//nucleus;GO:0005654//nucleoplasm;GO:0005730//nucleolus;GO:0005737//cytoplasm;GO:0005813//centrosome;GO:0016581//NuRD complex;GO:0016605//PML body;GO:0034451//centriolar satellite;GO:0043231//intracellular membrane-bounded organelle	GO:0000166//nucleotide binding;GO:0000976//transcription cis-regulatory region binding;GO:0003677//DNA binding;GO:0003682//chromatin binding;GO:0004386//helicase activity;GO:0005515//protein binding;GO:0005524//ATP binding;GO:0016787//hydrolase activity;GO:0016887//ATP hydrolysis activity;GO:0042393//histone binding;GO:0046872//metal ion binding;GO:0140658//ATP-dependent chromatin remodeler activ…	GO:0000122//negative regulation of transcription by RNA polymerase II;GO:0006325//chromatin organization;GO:0006338//chromatin remodeling;GO:0007051//spindle organization;GO:0007098//centrosome cycle;GO:0016570//histone modification;GO:0016575//histone deacetylation;GO:0042659//regulation of cell fate specification;GO:0045892//negative regulation of transcription, DNA-templated;GO:0045893//positi…	--
ENSMUSG00000018537	43.822	44.632	44.355	8.296	10.262	10.398	524	504	575	103	137	121	Pcgf2	polycomb group ring finger 2 [Source:MGI Symbol;Acc:MGI:99161]	Cellular Processes	Cellular community - eukaryotes	ko04550//Signaling pathways regulating pluripotency of stem cells	K11460	GO:0000785//chromatin;GO:0001739//sex chromatin;GO:0005634//nucleus;GO:0005654//nucleoplasm;GO:0016604//nuclear body;GO:0031519//PcG protein complex;GO:0035102//PRC1 complex	GO:0003677//DNA binding;GO:0003682//chromatin binding;GO:0005515//protein binding;GO:0046872//metal ion binding;GO:1990841//promoter-specific chromatin binding	GO:0000122//negative regulation of transcription by RNA polymerase II;GO:0001701//in utero embryonic development;GO:0009952//anterior/posterior pattern specification;GO:0016573//histone acetylation;GO:0036353//histone H2A-K119 monoubiquitination;GO:0048704//embryonic skeletal system morphogenesis;GO:0048706//embryonic skeletal system development;GO:0070301//cellular response to hydrogen peroxide;…	--
ENSMUSG00000018581	0.18	0.244	0.185	0.096	0.051	0.04	14.63	16.64	10.82	5.43	4.21	3.12	Dnah11	dynein, axonemal, heavy chain 11 [Source:MGI Symbol;Acc:MGI:1100864]	Human Diseases;Human Diseases;Human Diseases	Neurodegenerative disease;Neurodegenerative disease;Neurodegenerative disease	ko05022//Pathways of neurodegeneration - multiple diseases;ko05014//Amyotrophic lateral sclerosis;ko05016//Huntington disease	K10408;K10408;K10408	GO:0005576//extracellular region;GO:0005737//cytoplasm;GO:0005856//cytoskeleton;GO:0005874//microtubule;GO:0005929//cilium;GO:0005930//axoneme;GO:0030286//dynein complex;GO:0031514//motile cilium;GO:0042995//cell projection;GO:0097728//9+0 motile cilium;GO:0097729//9+2 motile cilium;GO:0120134//proximal portion of axoneme	GO:0000166//nucleotide binding;GO:0005524//ATP binding;GO:0008569//minus-end-directed microtubule motor activity;GO:0045505//dynein intermediate chain binding;GO:0051959//dynein light intermediate chain binding	GO:0003341//cilium movement;GO:0003351//epithelial cilium movement involved in extracellular fluid movement;GO:0003356//regulation of cilium beat frequency;GO:0007018//microtubule-based movement;GO:0007368//determination of left/right symmetry;GO:0007507//heart development;GO:0007611//learning or memory;GO:0030317//flagellated sperm motility;GO:0035545//determination of left/right asymmetry in ne…	--
ENSMUSG00000018604	0.302	0.415	0.368	0.833	0.904	0.746	10	13	13	28	34	24	Tbx3	T-box 3 [Source:MGI Symbol;Acc:MGI:98495]	Cellular Processes	Cellular community - eukaryotes	ko04550//Signaling pathways regulating pluripotency of stem cells	K10177	GO:0005634//nucleus;GO:0005929//cilium	GO:0000978//RNA polymerase II cis-regulatory region sequence-specific DNA binding;GO:0000981//DNA-binding transcription factor activity, RNA polymerase II-specific;GO:0001227//DNA-binding transcription repressor activity, RNA polymerase II-specific;GO:0001228//DNA-binding transcription activator activity, RNA polymerase II-specific;GO:0003677//DNA binding;GO:0003700//DNA-binding transcription fac…	GO:0000122//negative regulation of transcription by RNA polymerase II;GO:0001501//skeletal system development;GO:0001568//blood vessel development;GO:0001701//in utero embryonic development;GO:0001708//cell fate specification;GO:0001947//heart looping;GO:0003007//heart morphogenesis;GO:0003151//outflow tract morphogenesis;GO:0003167//atrioventricular bundle cell differentiation;GO:0003205//cardia…	T-box
ENSMUSG00000018865	10.601	10.966	10.518	2.465	2.217	1.615	141	144	147	32	32	23	Sult4a1	sulfotransferase family 4A, member 1 [Source:MGI Symbol;Acc:MGI:1888971]	-	-	-	-	GO:0005737//cytoplasm;GO:0005739//mitochondrion;GO:0005829//cytosol	GO:0008146//sulfotransferase activity;GO:0016740//transferase activity;GO:0042802//identical protein binding	GO:0006629//lipid metabolic process;GO:0006790//sulfur compound metabolic process;GO:0008202//steroid metabolic process;GO:0051923//sulfation;GO:0140059//dendrite arborization	--
ENSMUSG00000019146	0.944	1.204	0.794	0.132	0.119	0.028	36	43	31	5	5	1	Cacng2	calcium channel, voltage-dependent, gamma subunit 2 [Source:MGI Symbol;Acc:MGI:1316660]	Environmental Information Processing;Human Diseases;Organismal Systems;Organismal Systems;Human Diseases;Organismal Systems;Human Diseases	Signal transduction;Cardiovascular disease;Endocrine system;Circulatory system;Cardiovascular disease;Circulatory system;Cardiovascular disease	ko04010//MAPK signaling pathway;ko05414//Dilated cardiomyopathy;ko04921//Oxytocin signaling pathway;ko04261//Adrenergic signaling in cardiomyocytes;ko05410//Hypertrophic cardiomyopathy;ko04260//Cardiac muscle contraction;ko05412//Arrhythmogenic right ventricular cardiomyopathy	K04867;K04867;K04867;K04867;K04867;K04867;K04867	GO:0005829//cytosol;GO:0005886//plasma membrane;GO:0005891//voltage-gated calcium channel complex;GO:0009986//cell surface;GO:0014069//postsynaptic density;GO:0016020//membrane;GO:0016021//integral component of membrane;GO:0032281//AMPA glutamate receptor complex;GO:0036477//somatodendritic compartment;GO:0043005//neuron projection;GO:0044300//cerebellar mossy fiber;GO:0045202//synapse;GO:0098685…	GO:0005244//voltage-gated ion channel activity;GO:0005245//voltage-gated calcium channel activity;GO:0005262//calcium channel activity;GO:0005515//protein binding;GO:0016247//channel regulator activity;GO:0035255//ionotropic glutamate receptor binding	GO:0006612//protein targeting to membrane;GO:0006811//ion transport;GO:0006816//calcium ion transport;GO:0007528//neuromuscular junction development;GO:0019226//transmission of nerve impulse;GO:0034765//regulation of ion transmembrane transport;GO:0042391//regulation of membrane potential;GO:0050877//nervous system process;GO:0051592//response to calcium ion;GO:0051899//membrane depolarization;GO…	--
ENSMUSG00000019256	1.146	1.926	1.043	0.079	0.331	0.636	44	54	41	3	14	13	Ahr	aryl-hydrocarbon receptor [Source:MGI Symbol;Acc:MGI:105043]	Human Diseases;Human Diseases;Human Diseases;Organismal Systems	Cancer: overview;Cancer: overview;Endocrine and metabolic disease;Immune system	ko05208//Chemical carcinogenesis - reactive oxygen species;ko05207//Chemical carcinogenesis - receptor activation;ko04934//Cushing syndrome;ko04659//Th17 cell differentiation	K09093;K09093;K09093;K09093	GO:0005634//nucleus;GO:0005737//cytoplasm;GO:0005829//cytosol;GO:0032991//protein-containing complex;GO:0034751//aryl hydrocarbon receptor complex;GO:0034753//nuclear aryl hydrocarbon receptor complex	GO:0000976//transcription cis-regulatory region binding;GO:0000987//cis-regulatory region sequence-specific DNA binding;GO:0001094//TFIID-class transcription factor complex binding;GO:0001223//transcription coactivator binding;GO:0003677//DNA binding;GO:0003700//DNA-binding transcription factor activity;GO:0004879//nuclear receptor activity;GO:0005515//protein binding;GO:0017025//TBP-class protei…	GO:0002819//regulation of adaptive immune response;GO:0002841//negative regulation of T cell mediated immune response to tumor cell;GO:0006355//regulation of transcription, DNA-templated;GO:0006357//regulation of transcription by RNA polymerase II;GO:0006805//xenobiotic metabolic process;GO:0007049//cell cycle;GO:0009410//response to xenobiotic stimulus;GO:0009636//response to toxic substance;GO:…	bHLH
ENSMUSG00000019590	0.843	0.931	0.632	0.053	0.048	0.056	16	10	10	1	1	1	Cyb561	cytochrome b-561 [Source:MGI Symbol;Acc:MGI:103253]	-	-	-	-	GO:0005765//lysosomal membrane;GO:0016020//membrane;GO:0016021//integral component of membrane;GO:0031410//cytoplasmic vesicle;GO:0042584//chromaffin granule membrane	GO:0016491//oxidoreductase activity;GO:0046872//metal ion binding;GO:0140575//transmembrane monodehydroascorbate reductase activity	GO:0006879//cellular iron ion homeostasis;GO:0140576//ascorbate homeostasis	--
ENSMUSG00000019817	73.534	70.482	69.24	19.31	17.429	18.628	2108	1968	2135	600	600	542	Plagl1	pleiomorphic adenoma gene-like 1 [Source:MGI Symbol;Acc:MGI:1100874]	-	-	-	-	GO:0005794//Golgi apparatus;GO:0016604//nuclear body;GO:0043231//intracellular membrane-bounded organelle	GO:0000977//RNA polymerase II transcription regulatory region sequence-specific DNA binding;GO:0000978//RNA polymerase II cis-regulatory region sequence-specific DNA binding;GO:0001228//DNA-binding transcription activator activity, RNA polymerase II-specific;GO:0003677//DNA binding;GO:0003700//DNA-binding transcription factor activity;GO:0005515//protein binding	GO:0006357//regulation of transcription by RNA polymerase II;GO:0010468//regulation of gene expression;GO:0035914//skeletal muscle cell differentiation;GO:0045944//positive regulation of transcription by RNA polymerase II	zf-C2H2
ENSMUSG00000019852	1.486	1.185	1.453	0.538	0.503	0.391	150	112	150	54	56	37	Arfgef3	ARFGEF family member 3 [Source:MGI Symbol;Acc:MGI:106387]	-	-	-	-	GO:0005794//Golgi apparatus;GO:0016020//membrane;GO:0030133//transport vesicle;GO:0030658//transport vesicle membrane;GO:0031410//cytoplasmic vesicle	GO:0005085//guanyl-nucleotide exchange factor activity	GO:0030036//actin cytoskeleton organization;GO:0032012//regulation of ARF protein signal transduction	--
ENSMUSG00000019866	0.94	0.817	0.876	0.286	0.218	0.186	43	35	41	13	11	8	Crybg1	crystallin beta-gamma domain containing 1 [Source:MGI Symbol;Acc:MGI:109544]	-	-	-	-	GO:0005575//cellular_component	GO:0003674//molecular_function;GO:0030246//carbohydrate binding	GO:0001654//eye development;GO:0008150//biological_process	--
ENSMUSG00000019876	0.186	0.377	0.182	2.234	0.899	0.523	2	2	2	17	14	7	Pkib	protein kinase inhibitor beta, cAMP dependent, testis specific [Source:MGI Symbol;Acc:MGI:101937]	-	-	-	-	-	GO:0004860//protein kinase inhibitor activity;GO:0004862//cAMP-dependent protein kinase inhibitor activity	GO:0006469//negative regulation of protein kinase activity;GO:0032212//positive regulation of telomere maintenance via telomerase;GO:0051338//regulation of transferase activity;GO:0051973//positive regulation of telomerase activity;GO:1904355//positive regulation of telomere capping;GO:2000480//negative regulation of cAMP-dependent protein kinase activity	--
ENSMUSG00000019889	18.658	17.72	18.012	4.599	3.677	4.632	591	554	631	149	146	141	Ptprk	protein tyrosine phosphatase, receptor type, K [Source:MGI Symbol;Acc:MGI:103310]	-	-	-	-	GO:0001750//photoreceptor outer segment;GO:0005886//plasma membrane;GO:0005911//cell-cell junction;GO:0009986//cell surface;GO:0016020//membrane;GO:0030054//cell junction;GO:0030424//axon;GO:0030425//dendrite;GO:0031256//leading edge membrane;GO:0043025//neuronal cell body;GO:0043231//intracellular membrane-bounded organelle	GO:0004721//phosphoprotein phosphatase activity;GO:0004725//protein tyrosine phosphatase activity;GO:0005515//protein binding;GO:0008013//beta-catenin binding;GO:0016787//hydrolase activity;GO:0016791//phosphatase activity;GO:0019901//protein kinase binding;GO:0045295//gamma-catenin binding	GO:0006470//protein dephosphorylation;GO:0007155//cell adhesion;GO:0007165//signal transduction;GO:0007179//transforming growth factor beta receptor signaling pathway;GO:0008285//negative regulation of cell population proliferation;GO:0010839//negative regulation of keratinocyte proliferation;GO:0016311//dephosphorylation;GO:0016477//cell migration;GO:0030336//negative regulation of cell migratio…	--
ENSMUSG00000019894	22.377	16.717	19.383	6.638	6.285	3.814	434	339	415	121	127	77	Slc6a15	solute carrier family 6 (neurotransmitter transporter), member 15 [Source:MGI Symbol;Acc:MGI:2143484]	-	-	-	-	GO:0005886//plasma membrane;GO:0005887//integral component of plasma membrane;GO:0016020//membrane;GO:0016021//integral component of membrane	GO:0005295//neutral amino acid:sodium symporter activity;GO:0005298//proline:sodium symporter activity;GO:0015293//symporter activity;GO:0015657//branched-chain amino acid:sodium symporter activity	GO:0003333//amino acid transmembrane transport;GO:0006811//ion transport;GO:0006814//sodium ion transport;GO:0006836//neurotransmitter transport;GO:0006865//amino acid transport;GO:0015804//neutral amino acid transport;GO:0015820//leucine transport;GO:0015824//proline transport;GO:0035725//sodium ion transmembrane transport;GO:0055085//transmembrane transport;GO:1903825//organic acid transmembran…	--
ENSMUSG00000019906	2.629	3.33	3.447	0.984	1.553	0.716	43	51	56	16	28	11	Lin7a	lin-7 homolog A, crumbs cell polarity complex component [Source:MGI Symbol;Acc:MGI:2135609]	-	-	-	-	GO:0005886//plasma membrane;GO:0005911//cell-cell junction;GO:0005923//bicellular tight junction;GO:0016020//membrane;GO:0016323//basolateral plasma membrane;GO:0030658//transport vesicle membrane;GO:0045202//synapse;GO:0045211//postsynaptic membrane;GO:0070161//anchoring junction;GO:0097025//MPP7-DLG1-LIN7 complex;GO:0098793//presynapse;GO:0098839//postsynaptic density membrane	GO:0005515//protein binding;GO:0030165//PDZ domain binding;GO:0097016//L27 domain binding	GO:0006887//exocytosis;GO:0007269//neurotransmitter secretion;GO:0015031//protein transport;GO:0045199//maintenance of epithelial cell apical/basal polarity;GO:0048489//synaptic vesicle transport;GO:0048839//inner ear development;GO:1903361//protein localization to basolateral plasma membrane	--
ENSMUSG00000019997	77.344	75.408	77.095	5.207	5.227	6.786	1260	1174	1286	87	96	84	Ccn2	cellular communication network factor 2 [Source:MGI Symbol;Acc:MGI:95537]	Environmental Information Processing;Environmental Information Processing	Signal transduction;Signal transduction	ko04390//Hippo signaling pathway;ko04371//Apelin signaling pathway	K06827;K06827	GO:0005576//extracellular region;GO:0005615//extracellular space;GO:0005801//cis-Golgi network;GO:0005829//cytosol;GO:0005938//cell cortex;GO:0031012//extracellular matrix;GO:0048471//perinuclear region of cytoplasm	GO:0001968//fibronectin binding;GO:0005178//integrin binding;GO:0005515//protein binding;GO:0008022//protein C-terminus binding;GO:0008083//growth factor activity;GO:0008201//heparin binding	GO:0001502//cartilage condensation;GO:0001503//ossification;GO:0001525//angiogenesis;GO:0001894//tissue homeostasis;GO:0001934//positive regulation of protein phosphorylation;GO:0002062//chondrocyte differentiation;GO:0007155//cell adhesion;GO:0007160//cell-matrix adhesion;GO:0007165//signal transduction;GO:0007229//integrin-mediated signaling pathway;GO:0008284//positive regulation of cell popul…	--
ENSMUSG00000020000	3.647	4.195	4.25	113.837	114.454	115.353	78	84	93	2421	2699	2316	Moxd1	monooxygenase, DBH-like 1 [Source:MGI Symbol;Acc:MGI:1921582]	-	-	-	-	GO:0005615//extracellular space;GO:0005783//endoplasmic reticulum;GO:0005789//endoplasmic reticulum membrane;GO:0016020//membrane;GO:0030667//secretory granule membrane	GO:0003824//catalytic activity;GO:0004497//monooxygenase activity;GO:0004500//dopamine beta-monooxygenase activity;GO:0005507//copper ion binding;GO:0016491//oxidoreductase activity;GO:0016715//oxidoreductase activity, acting on paired donors, with incorporation or reduction of molecular oxygen, reduced ascorbate as one donor, and incorporation of one atom of oxygen;GO:0046872//metal ion binding	GO:0006589//octopamine biosynthetic process;GO:0042420//dopamine catabolic process;GO:0042421//norepinephrine biosynthetic process	--
ENSMUSG00000020019	17.157	17.352	19.286	37.34	35.005	36.851	433	410	498	937	974	873	Ntn4	netrin 4 [Source:MGI Symbol;Acc:MGI:1888978]	Organismal Systems	Development and regeneration	ko04360//Axon guidance	K06845	GO:0005576//extracellular region;GO:0005604//basement membrane;GO:0005886//plasma membrane;GO:0043256//laminin complex	GO:0005515//protein binding;GO:0043237//laminin-1 binding	GO:0009887//animal organ morphogenesis;GO:0009888//tissue development;GO:0016322//neuron remodeling;GO:0016477//cell migration;GO:0034446//substrate adhesion-dependent cell spreading;GO:0060668//regulation of branching involved in salivary gland morphogenesis by extracellular matrix-epithelial cell signaling;GO:0070831//basement membrane assembly	--
ENSMUSG00000020023	81.029	93.243	83.147	41.722	41.035	43.633	2558	2382	2549	1484	1629	1402	Tmcc3	transmembrane and coiled coil domains 3 [Source:MGI Symbol;Acc:MGI:2442900]	-	-	-	-	GO:0005783//endoplasmic reticulum;GO:0005789//endoplasmic reticulum membrane;GO:0012505//endomembrane system;GO:0016020//membrane	GO:0042802//identical protein binding;GO:0071889//14-3-3 protein binding	GO:0008150//biological_process	--
ENSMUSG00000020032	35.948	37.424	36.557	2.327	2.976	2.326	1383	1348	1439	89	96	84	Nuak1	NUAK family, SNF1-like kinase, 1 [Source:MGI Symbol;Acc:MGI:1925226]	-	-	-	-	GO:0001650//fibrillar center;GO:0005634//nucleus;GO:0005654//nucleoplasm;GO:0005737//cytoplasm;GO:0015630//microtubule cytoskeleton	GO:0000166//nucleotide binding;GO:0002039//p53 binding;GO:0004672//protein kinase activity;GO:0004674//protein serine/threonine kinase activity;GO:0005524//ATP binding;GO:0016301//kinase activity;GO:0016740//transferase activity;GO:0106310//protein serine kinase activity	GO:0006468//protein phosphorylation;GO:0006974//cellular response to DNA damage stimulus;GO:0007155//cell adhesion;GO:0016310//phosphorylation;GO:0030155//regulation of cell adhesion;GO:0035507//regulation of myosin-light-chain-phosphatase activity;GO:0035556//intracellular signal transduction;GO:0042149//cellular response to glucose starvation;GO:2000772//regulation of cellular senescence	--
ENSMUSG00000020077	1.848	1.394	1.221	0	0	0.444	12	7	6	0	0	2	Srgn	serglycin [Source:MGI Symbol;Acc:MGI:97756]	-	-	-	-	GO:0000139//Golgi membrane;GO:0005576//extracellular region;GO:0005615//extracellular space;GO:0005764//lysosome;GO:0005794//Golgi apparatus;GO:0030141//secretory granule;GO:0042588//zymogen granule;GO:0042629//mast cell granule;GO:0044194//cytolytic granule;GO:0098685//Schaffer collateral - CA1 synapse;GO:0098978//glutamatergic synapse;GO:0099091//postsynaptic specialization, intracellular compo…	GO:0005515//protein binding;GO:0005518//collagen binding	GO:0001818//negative regulation of cytokine production;GO:0006915//apoptotic process;GO:0016485//protein processing;GO:0030502//negative regulation of bone mineralization;GO:0031214//biomineral tissue development;GO:0033363//secretory granule organization;GO:0033364//mast cell secretory granule organization;GO:0033371//T cell secretory granule organization;GO:0033373//maintenance of protease loca…	--
ENSMUSG00000020173	4.925	4.227	4.791	0.666	0.709	0.701	163	139	151	22	30	24	Cobl	cordon-bleu WH2 repeat [Source:MGI Symbol;Acc:MGI:105056]	-	-	-	-	GO:0001726//ruffle;GO:0005737//cytoplasm;GO:0005856//cytoskeleton;GO:0005884//actin filament;GO:0005886//plasma membrane;GO:0005938//cell cortex;GO:0016020//membrane;GO:0030424//axon;GO:0030425//dendrite;GO:0042995//cell projection;GO:0043025//neuronal cell body;GO:0044294//dendritic growth cone;GO:0044295//axonal growth cone;GO:0048471//perinuclear region of cytoplasm;GO:1990357//terminal web	GO:0003779//actin binding;GO:0003785//actin monomer binding;GO:0005515//protein binding	GO:0000578//embryonic axis specification;GO:0001757//somite specification;GO:0001843//neural tube closure;GO:0001889//liver development;GO:0030036//actin cytoskeleton organization;GO:0030041//actin filament polymerization;GO:0030903//notochord development;GO:0033504//floor plate development;GO:0048565//digestive tract development;GO:0048669//collateral sprouting in absence of injury;GO:0051639//a…	--
ENSMUSG00000020176	7.426	8.642	8.46	48.872	50.859	47.029	213	237	272	1652	1949	1539	Grb10	growth factor receptor bound protein 10 [Source:MGI Symbol;Acc:MGI:103232]	Environmental Information Processing	Signal transduction	ko04150//mTOR signaling pathway	K20064	GO:0005737//cytoplasm;GO:0005829//cytosol;GO:0032991//protein-containing complex	GO:0001784//phosphotyrosine residue binding;GO:0005158//insulin receptor binding;GO:0005515//protein binding;GO:0030159//signaling receptor complex adaptor activity;GO:0030674//protein-macromolecule adaptor activity;GO:0042802//identical protein binding	GO:0007165//signal transduction;GO:0008286//insulin receptor signaling pathway;GO:0010467//gene expression;GO:0030178//negative regulation of Wnt signaling pathway;GO:0030949//positive regulation of vascular endothelial growth factor receptor signaling pathway;GO:0032868//response to insulin;GO:0042326//negative regulation of phosphorylation;GO:0042327//positive regulation of phosphorylation;GO:0…	--
ENSMUSG00000020178	0.167	0.178	1.049	4.925	4.795	4.082	3	3	14	88	95	63	Adora2a	adenosine A2a receptor [Source:MGI Symbol;Acc:MGI:99402]	Environmental Information Processing;Environmental Information Processing;Human Diseases;Environmental Information Processing;Environmental Information Processing;Human Diseases;Organismal Systems	Signaling molecules and interaction;Signal transduction;Neurodegenerative disease;Signal transduction;Signal transduction;Substance dependence;Circulatory system	ko04080//Neuroactive ligand-receptor interaction;ko04020//Calcium signaling pathway;ko05012//Parkinson disease;ko04015//Rap1 signaling pathway;ko04024//cAMP signaling pathway;ko05034//Alcoholism;ko04270//Vascular smooth muscle contraction	K04266;K04266;K04266;K04266;K04266;K04266;K04266	GO:0005882//intermediate filament;GO:0005886//plasma membrane;GO:0012505//endomembrane system;GO:0014069//postsynaptic density;GO:0016020//membrane;GO:0016021//integral component of membrane;GO:0030424//axon;GO:0030425//dendrite;GO:0030673//axolemma;GO:0032279//asymmetric synapse;GO:0042734//presynaptic membrane;GO:0043025//neuronal cell body;GO:0045211//postsynaptic membrane;GO:0048786//presynap…	GO:0001609//G protein-coupled adenosine receptor activity;GO:0004930//G protein-coupled receptor activity;GO:0008289//lipid binding;GO:0019899//enzyme binding;GO:0031802//type 5 metabotropic glutamate receptor binding;GO:0042802//identical protein binding;GO:0044877//protein-containing complex binding;GO:0051393//alpha-actinin binding	GO:0001963//synaptic transmission, dopaminergic;GO:0001973//G protein-coupled adenosine receptor signaling pathway;GO:0001975//response to amphetamine;GO:0006355//regulation of transcription, DNA-templated;GO:0006469//negative regulation of protein kinase activity;GO:0007165//signal transduction;GO:0007186//G protein-coupled receptor signaling pathway;GO:0007189//adenylate cyclase-activating G pr…	--
ENSMUSG00000020183	8.065	8.465	8.616	1.091	1.312	1.096	290	285	317	39	52	37	Cpm	carboxypeptidase M [Source:MGI Symbol;Acc:MGI:1917824]	-	-	-	-	GO:0005615//extracellular space;GO:0005886//plasma membrane;GO:0016020//membrane	GO:0004180//carboxypeptidase activity;GO:0004181//metallocarboxypeptidase activity;GO:0008233//peptidase activity;GO:0008237//metallopeptidase activity;GO:0008270//zinc ion binding;GO:0016787//hydrolase activity;GO:0046872//metal ion binding	GO:0006508//proteolysis;GO:0006518//peptide metabolic process;GO:0016485//protein processing	--
ENSMUSG00000020218	0.331	0.404	0.246	1.272	1.314	1.141	5	6	4	20	23	17	Wif1	Wnt inhibitory factor 1 [Source:MGI Symbol;Acc:MGI:1344332]	Environmental Information Processing	Signal transduction	ko04310//Wnt signaling pathway	K01691	GO:0005576//extracellular region;GO:0009986//cell surface	GO:0005102//signaling receptor binding;GO:0017147//Wnt-protein binding	GO:0016055//Wnt signaling pathway;GO:0030178//negative regulation of Wnt signaling pathway;GO:0045600//positive regulation of fat cell differentiation;GO:0048856//anatomical structure development	--
ENSMUSG00000020303	2.383	2.781	2.473	11.985	12.97	12.265	65	71	69	325	390	314	Stc2	stanniocalcin 2 [Source:MGI Symbol;Acc:MGI:1316731]	-	-	-	-	GO:0005576//extracellular region;GO:0005615//extracellular space;GO:0005783//endoplasmic reticulum;GO:0005794//Golgi apparatus;GO:0048471//perinuclear region of cytoplasm	GO:0005179//hormone activity;GO:0005515//protein binding;GO:0019899//enzyme binding;GO:0020037//heme binding;GO:0042803//protein homodimerization activity	GO:0006874//cellular calcium ion homeostasis;GO:0006979//response to oxidative stress;GO:0007165//signal transduction;GO:0007566//embryo implantation;GO:0010629//negative regulation of gene expression;GO:0030968//endoplasmic reticulum unfolded protein response;GO:0033280//response to vitamin D;GO:0034976//response to endoplasmic reticulum stress;GO:0040015//negative regulation of multicellular or…	--
ENSMUSG00000020312	9.578	8.469	9.927	3.36	3.232	3.797	215	178	228	75	80	80	Shc2	SHC (Src homology 2 domain containing) transforming protein 2 [Source:MGI Symbol;Acc:MGI:106180]	Environmental Information Processing;Organismal Systems;Environmental Information Processing;Cellular Processes;Human Diseases;Organismal Systems;Human Diseases;Human Diseases;Human Diseases;Organismal Systems;Organismal Systems;Organismal Systems;Organismal Systems;Organismal Systems;Human Diseases;Environmental Information Processing;Organismal Systems;Human Diseases;Human Diseases;Human Diseas…	Signal transduction;Immune system;Signal transduction;Cellular community - eukaryotes;Substance dependence;Immune system;Cancer: specific types;Cancer: specific types;Cancer: specific types;Endocrine system;Endocrine system;Endocrine system;Nervous system;Endocrine system;Drug resistance: antineoplastic;Signal transduction;Endocrine system;Infectious disease: bacterial;Drug resistance: antineopla…	ko04072//Phospholipase D signaling pathway;ko04650//Natural killer cell mediated cytotoxicity;ko04014//Ras signaling pathway;ko04510//Focal adhesion;ko05034//Alcoholism;ko04062//Chemokine signaling pathway;ko05225//Hepatocellular carcinoma;ko05226//Gastric cancer;ko05224//Breast cancer;ko04910//Insulin signaling pathway;ko04915//Estrogen signaling pathway;ko04926//Relaxin signaling pathway;ko0472…	K17447;K17447;K17447;K17447;K17447;K17447;K17447;K17447;K17447;K17447;K17447;K17447;K17447;K17447;K17447;K17447;K17447;K17447;K17447;K17447;K17447;K17447	GO:0005886//plasma membrane	GO:0019901//protein kinase binding;GO:0030971//receptor tyrosine kinase binding	GO:0007169//transmembrane receptor protein tyrosine kinase signaling pathway;GO:0035556//intracellular signal transduction;GO:0043410//positive regulation of MAPK cascade	--
ENSMUSG00000020331	17.273	20.864	18.34	2.228	1.928	1.947	382	432	415	49	47	40	Hcn2	hyperpolarization-activated, cyclic nucleotide-gated K+ 2 [Source:MGI Symbol;Acc:MGI:1298210]	Environmental Information Processing;Organismal Systems	Signal transduction;Endocrine system	ko04024//cAMP signaling pathway;ko04929//GnRH secretion	K04955;K04955	GO:0005737//cytoplasm;GO:0005886//plasma membrane;GO:0016020//membrane;GO:0030424//axon;GO:0030425//dendrite;GO:0032590//dendrite membrane;GO:0036477//somatodendritic compartment;GO:0043025//neuronal cell body;GO:0043198//dendritic shaft;GO:0045202//synapse;GO:0098855//HCN channel complex;GO:0110165//cellular anatomical entity	GO:0000166//nucleotide binding;GO:0005216//ion channel activity;GO:0005222//intracellular cAMP-activated cation channel activity;GO:0005244//voltage-gated ion channel activity;GO:0005248//voltage-gated sodium channel activity;GO:0005249//voltage-gated potassium channel activity;GO:0005267//potassium channel activity;GO:0005272//sodium channel activity;GO:0005515//protein binding;GO:0030165//PDZ d…	GO:0003254//regulation of membrane depolarization;GO:0006811//ion transport;GO:0006813//potassium ion transport;GO:0006814//sodium ion transport;GO:0034765//regulation of ion transmembrane transport;GO:0035725//sodium ion transmembrane transport;GO:0042391//regulation of membrane potential;GO:0055085//transmembrane transport;GO:0071320//cellular response to cAMP;GO:0071321//cellular response to c…	--
ENSMUSG00000020334	16.087	15.615	14.975	1.284	1.911	1.768	252	229	240	20	33	26	Slc22a4	solute carrier family 22 (organic cation transporter), member 4 [Source:MGI Symbol;Acc:MGI:1353479]	Human Diseases	Cancer: overview	ko05231//Choline metabolism in cancer	K08202	GO:0005739//mitochondrion;GO:0009925//basal plasma membrane;GO:0016020//membrane;GO:0016021//integral component of membrane;GO:0016324//apical plasma membrane	GO:0000166//nucleotide binding;GO:0005524//ATP binding;GO:0015101//organic cation transmembrane transporter activity;GO:0015171//amino acid transmembrane transporter activity;GO:0015226//carnitine transmembrane transporter activity;GO:0015293//symporter activity;GO:0015651//quaternary ammonium group transmembrane transporter activity;GO:0022857//transmembrane transporter activity;GO:0030165//PDZ …	GO:0006641//triglyceride metabolic process;GO:0006811//ion transport;GO:0006814//sodium ion transport;GO:0009437//carnitine metabolic process;GO:0015697//quaternary ammonium group transport;GO:0015879//carnitine transport;GO:0042908//xenobiotic transport;GO:0055085//transmembrane transport;GO:0071705//nitrogen compound transport;GO:0089718//amino acid import across plasma membrane;GO:1902603//car…	--
ENSMUSG00000020396	0.651	0.425	0.247	0.109	0.098	0.077	18	11	7	3	3	2	Nefh	neurofilament, heavy polypeptide [Source:MGI Symbol;Acc:MGI:97309]	Human Diseases;Human Diseases	Neurodegenerative disease;Neurodegenerative disease	ko05022//Pathways of neurodegeneration - multiple diseases;ko05014//Amyotrophic lateral sclerosis	K04574;K04574	GO:0005634//nucleus;GO:0005737//cytoplasm;GO:0005739//mitochondrion;GO:0005856//cytoskeleton;GO:0005882//intermediate filament;GO:0005883//neurofilament;GO:0014069//postsynaptic density;GO:0030424//axon;GO:0042995//cell projection;GO:0043025//neuronal cell body;GO:0043204//perikaryon;GO:0043209//myelin sheath;GO:0097418//neurofibrillary tangle;GO:0097440//apical dendrite;GO:0098685//Schaffer coll…	GO:0005200//structural constituent of cytoskeleton;GO:0015643//toxic substance binding;GO:0019901//protein kinase binding;GO:0030674//protein-macromolecule adaptor activity;GO:0044877//protein-containing complex binding;GO:0099184//structural constituent of postsynaptic intermediate filament cytoskeleton	GO:0000226//microtubule cytoskeleton organization;GO:0001552//ovarian follicle atresia;GO:0007420//brain development;GO:0031103//axon regeneration;GO:0033693//neurofilament bundle assembly;GO:0045104//intermediate filament cytoskeleton organization;GO:0045110//intermediate filament bundle assembly;GO:0048936//peripheral nervous system neuron axonogenesis;GO:0060052//neurofilament cytoskeleton org…	--
ENSMUSG00000020473	5.996	6.042	7.374	38.218	38.23	39.529	159	150	186	987	1088	955	Aebp1	AE binding protein 1 [Source:MGI Symbol;Acc:MGI:1197012]	-	-	-	-	GO:0005576//extracellular region;GO:0005615//extracellular space;GO:0005634//nucleus;GO:0005737//cytoplasm	GO:0000977//RNA polymerase II transcription regulatory region sequence-specific DNA binding;GO:0001227//DNA-binding transcription repressor activity, RNA polymerase II-specific;GO:0003677//DNA binding;GO:0004180//carboxypeptidase activity;GO:0004181//metallocarboxypeptidase activity;GO:0005516//calmodulin binding;GO:0005518//collagen binding;GO:0008270//zinc ion binding	GO:0000122//negative regulation of transcription by RNA polymerase II;GO:0006355//regulation of transcription, DNA-templated;GO:0006508//proteolysis;GO:1904026//regulation of collagen fibril organization	--
ENSMUSG00000020524	32.065	31.467	31.257	5.685	5.056	5.051	1229	1130	1227	217	214	182	Gria1	glutamate receptor, ionotropic, AMPA1 (alpha 1) [Source:MGI Symbol;Acc:MGI:95808]	Human Diseases;Environmental Information Processing;Human Diseases;Human Diseases;Environmental Information Processing;Organismal Systems;Human Diseases;Organismal Systems;Organismal Systems;Organismal Systems;Human Diseases;Organismal Systems;Organismal Systems;Human Diseases	Neurodegenerative disease;Signaling molecules and interaction;Neurodegenerative disease;Neurodegenerative disease;Signal transduction;Nervous system;Neurodegenerative disease;Nervous system;Nervous system;Environmental adaptation;Substance dependence;Nervous system;Nervous system;Substance dependence	ko05022//Pathways of neurodegeneration - multiple diseases;ko04080//Neuroactive ligand-receptor interaction;ko05014//Amyotrophic lateral sclerosis;ko05016//Huntington disease;ko04024//cAMP signaling pathway;ko04723//Retrograde endocannabinoid signaling;ko05017//Spinocerebellar ataxia;ko04728//Dopaminergic synapse;ko04724//Glutamatergic synapse;ko04713//Circadian entrainment;ko05031//Amphetamine a…	K05197;K05197;K05197;K05197;K05197;K05197;K05197;K05197;K05197;K05197;K05197;K05197;K05197;K05197	GO:0005737//cytoplasm;GO:0005768//endosome;GO:0005769//early endosome;GO:0005783//endoplasmic reticulum;GO:0005789//endoplasmic reticulum membrane;GO:0005829//cytosol;GO:0005886//plasma membrane;GO:0005911//cell-cell junction;GO:0008021//synaptic vesicle;GO:0008328//ionotropic glutamate receptor complex;GO:0009986//cell surface;GO:0014069//postsynaptic density;GO:0016020//membrane;GO:0030425//den…	GO:0001540//amyloid-beta binding;GO:0001965//G-protein alpha-subunit binding;GO:0004970//ionotropic glutamate receptor activity;GO:0004971//AMPA glutamate receptor activity;GO:0005216//ion channel activity;GO:0005515//protein binding;GO:0008022//protein C-terminus binding;GO:0008179//adenylate cyclase binding;GO:0015276//ligand-gated ion channel activity;GO:0019865//immunoglobulin binding;GO:0019…	GO:0001919//regulation of receptor recycling;GO:0006811//ion transport;GO:0007268//chemical synaptic transmission;GO:0007616//long-term memory;GO:0009636//response to toxic substance;GO:0010628//positive regulation of gene expression;GO:0019228//neuronal action potential;GO:0031623//receptor internalization;GO:0034220//ion transmembrane transport;GO:0035235//ionotropic glutamate receptor signalin…	--
ENSMUSG00000020564	22.698	29.213	25.616	11.017	9.133	8.084	323	373	355	156	134	106	Atxn7l1	ataxin 7-like 1 [Source:MGI Symbol;Acc:MGI:3584458]	-	-	-	-	GO:0005575//cellular_component	GO:0003674//molecular_function	GO:0008150//biological_process	--
ENSMUSG00000020583	0.767	0.973	0.796	0.096	0.217	0.306	16	19	17	2	5	6	Matn3	matrilin 3 [Source:MGI Symbol;Acc:MGI:1328350]	-	-	-	-	GO:0005576//extracellular region;GO:0031012//extracellular matrix;GO:0062023//collagen-containing extracellular matrix;GO:0120216//matrilin complex	GO:0005509//calcium ion binding	GO:0030198//extracellular matrix organization;GO:0051216//cartilage development	--
ENSMUSG00000020627	8.342	9.229	9.103	1.422	1.38	1.204	323	320	350	64	65	43	Klhl29	kelch-like 29 [Source:MGI Symbol;Acc:MGI:2683857]	-	-	-	-	GO:0005575//cellular_component	GO:0003674//molecular_function;GO:0005515//protein binding	GO:0008150//biological_process	--
ENSMUSG00000020635	9.977	3.004	4.774	0.298	1.745	2.208	31	19	33	2	13	14	Fkbp1b	FK506 binding protein 1b [Source:MGI Symbol;Acc:MGI:1336205]	-	-	-	-	GO:0005737//cytoplasm;GO:0016020//membrane;GO:0016529//sarcoplasmic reticulum;GO:0030018//Z disc;GO:0033017//sarcoplasmic reticulum membrane;GO:0034704//calcium channel complex;GO:0043231//intracellular membrane-bounded organelle	GO:0003755//peptidyl-prolyl cis-trans isomerase activity;GO:0005102//signaling receptor binding;GO:0005515//protein binding;GO:0005528//FK506 binding;GO:0016853//isomerase activity;GO:0019855//calcium channel inhibitor activity;GO:0030551//cyclic nucleotide binding;GO:0044325//transmembrane transporter binding	GO:0000413//protein peptidyl-prolyl isomerization;GO:0002027//regulation of heart rate;GO:0006939//smooth muscle contraction;GO:0007204//positive regulation of cytosolic calcium ion concentration;GO:0009749//response to glucose;GO:0010033//response to organic substance;GO:0010459//negative regulation of heart rate;GO:0010880//regulation of release of sequestered calcium ion into cytosol by sarcop…	--
ENSMUSG00000020656	0.902	0.89	0.736	2.378	2.628	2.38	21	20	16	53	68	53	Grhl1	grainyhead like transcription factor 1 [Source:MGI Symbol;Acc:MGI:2182540]	-	-	-	-	GO:0005634//nucleus;GO:0005654//nucleoplasm;GO:0043231//intracellular membrane-bounded organelle	GO:0000976//transcription cis-regulatory region binding;GO:0000978//RNA polymerase II cis-regulatory region sequence-specific DNA binding;GO:0001228//DNA-binding transcription activator activity, RNA polymerase II-specific;GO:0003677//DNA binding;GO:0003700//DNA-binding transcription factor activity;GO:0031490//chromatin DNA binding;GO:0042803//protein homodimerization activity;GO:0043565//sequen…	GO:0002934//desmosome organization;GO:0006355//regulation of transcription, DNA-templated;GO:0006357//regulation of transcription by RNA polymerase II;GO:0008544//epidermis development;GO:0045616//regulation of keratinocyte differentiation;GO:0045944//positive regulation of transcription by RNA polymerase II;GO:0061436//establishment of skin barrier	CP2
ENSMUSG00000020682	1.12	0.838	0.782	8.512	7.891	7.07	25.58	16.01	17.31	187.8	183.69	146.9	Mmp28	matrix metallopeptidase 28 (epilysin) [Source:MGI Symbol;Acc:MGI:2153062]	-	-	-	-	GO:0005615//extracellular space;GO:0005737//cytoplasm;GO:0031012//extracellular matrix	GO:0004222//metalloendopeptidase activity;GO:0008233//peptidase activity;GO:0008237//metallopeptidase activity;GO:0008270//zinc ion binding;GO:0016787//hydrolase activity;GO:0046872//metal ion binding	GO:0006508//proteolysis;GO:0010760//negative regulation of macrophage chemotaxis;GO:0030198//extracellular matrix organization;GO:0030574//collagen catabolic process	--
ENSMUSG00000020689	1.923	1.627	1.465	0.377	0.544	0.452	77	61	60	15	24	17	Itgb3	integrin beta 3 [Source:MGI Symbol;Acc:MGI:96612]	Human Diseases;Environmental Information Processing;Human Diseases;Organismal Systems;Cellular Processes;Human Diseases;Cellular Processes;Environmental Information Processing;Organismal Systems;Human Diseases;Human Diseases;Cellular Processes;Human Diseases;Human Diseases;Organismal Systems;Organismal Systems;Organismal Systems;Human Diseases;Environmental Information Processing;Human Diseases	Infectious disease: viral;Signal transduction;Infectious disease: viral;Immune system;Transport and catabolism;Infectious disease: viral;Cell motility;Signal transduction;Immune system;Cardiovascular disease;Cancer: overview;Cellular community - eukaryotes;Cancer: overview;Cardiovascular disease;Development and regeneration;Immune system;Endocrine system;Cardiovascular disease;Signaling molecules…	ko05168//Herpes simplex virus 1 infection;ko04151//PI3K-Akt signaling pathway;ko05165//Human papillomavirus infection;ko04613//Neutrophil extracellular trap formation;ko04145//Phagosome;ko05163//Human cytomegalovirus infection;ko04810//Regulation of actin cytoskeleton;ko04015//Rap1 signaling pathway;ko04640//Hematopoietic cell lineage;ko05414//Dilated cardiomyopathy;ko05205//Proteoglycans in canc…	K06493;K06493;K06493;K06493;K06493;K06493;K06493;K06493;K06493;K06493;K06493;K06493;K06493;K06493;K06493;K06493;K06493;K06493;K06493;K06493	GO:0005634//nucleus;GO:0005654//nucleoplasm;GO:0005886//plasma membrane;GO:0005911//cell-cell junction;GO:0005925//focal adhesion;GO:0008305//integrin complex;GO:0009897//external side of plasma membrane;GO:0009986//cell surface;GO:0016020//membrane;GO:0016324//apical plasma membrane;GO:0031258//lamellipodium membrane;GO:0031527//filopodium membrane;GO:0031528//microvillus membrane;GO:0032587//ru…	GO:0001968//fibronectin binding;GO:0002020//protease binding;GO:0003756//protein disulfide isomerase activity;GO:0005080//protein kinase C binding;GO:0005178//integrin binding;GO:0005515//protein binding;GO:0017134//fibroblast growth factor binding;GO:0019899//enzyme binding;GO:0019960//C-X3-C chemokine binding;GO:0031994//insulin-like growth factor I binding;GO:0038132//neuregulin binding;GO:004…	GO:0001938//positive regulation of endothelial cell proliferation;GO:0001954//positive regulation of cell-matrix adhesion;GO:0002687//positive regulation of leukocyte migration;GO:0007044//cell-substrate junction assembly;GO:0007155//cell adhesion;GO:0007160//cell-matrix adhesion;GO:0007229//integrin-mediated signaling pathway;GO:0007566//embryo implantation;GO:0008277//regulation of G protein-co…	--
ENSMUSG00000020704	2.615	2.55	3.694	0.161	0.34	0.456	58	54	83	3	7	8	Asic2	acid-sensing (proton-gated) ion channel 2 [Source:MGI Symbol;Acc:MGI:1100867]	Organismal Systems;Organismal Systems	Sensory system;Sensory system	ko04750//Inflammatory mediator regulation of TRP channels;ko04742//Taste transduction	K04828;K04828	GO:0005886//plasma membrane;GO:0016020//membrane;GO:0016021//integral component of membrane;GO:0043005//neuron projection;GO:0043025//neuronal cell body;GO:0043197//dendritic spine;GO:0045202//synapse	GO:0005216//ion channel activity;GO:0005248//voltage-gated sodium channel activity;GO:0005261//cation channel activity;GO:0005272//sodium channel activity;GO:0005515//protein binding;GO:0015267//channel activity;GO:0015280//ligand-gated sodium channel activity;GO:0022839//ion gated channel activity	GO:0003026//regulation of systemic arterial blood pressure by aortic arch baroreceptor feedback;GO:0006811//ion transport;GO:0006812//cation transport;GO:0006814//sodium ion transport;GO:0007416//synapse assembly;GO:0007602//phototransduction;GO:0007605//sensory perception of sound;GO:0009612//response to mechanical stimulus;GO:0010447//response to acidic pH;GO:0019229//regulation of vasoconstric…	--
ENSMUSG00000020734	1.283	1.048	0.895	5.167	5.434	4.824	38	30	29	155	184	136	Grin2c	glutamate receptor, ionotropic, NMDA2C (epsilon 3) [Source:MGI Symbol;Acc:MGI:95822]	Human Diseases;Human Diseases;Environmental Information Processing;Human Diseases;Environmental Information Processing;Human Diseases;Environmental Information Processing;Human Diseases;Human Diseases;Organismal Systems;Organismal Systems;Human Diseases;Organismal Systems;Human Diseases;Human Diseases	Neurodegenerative disease;Neurodegenerative disease;Signaling molecules and interaction;Neurodegenerative disease;Signal transduction;Neurodegenerative disease;Signal transduction;Substance dependence;Neurodegenerative disease;Nervous system;Environmental adaptation;Substance dependence;Nervous system;Substance dependence;Substance dependence	ko05022//Pathways of neurodegeneration - multiple diseases;ko05010//Alzheimer disease;ko04080//Neuroactive ligand-receptor interaction;ko05014//Amyotrophic lateral sclerosis;ko04020//Calcium signaling pathway;ko05020//Prion disease;ko04024//cAMP signaling pathway;ko05034//Alcoholism;ko05017//Spinocerebellar ataxia;ko04724//Glutamatergic synapse;ko04713//Circadian entrainment;ko05031//Amphetamine …	K05211;K05211;K05211;K05211;K05211;K05211;K05211;K05211;K05211;K05211;K05211;K05211;K05211;K05211;K05211	GO:0005886//plasma membrane;GO:0016020//membrane;GO:0017146//NMDA selective glutamate receptor complex;GO:0045202//synapse;GO:0045211//postsynaptic membrane;GO:0097060//synaptic membrane;GO:0098794//postsynapse;GO:0098839//postsynaptic density membrane;GO:0098978//glutamatergic synapse	GO:0004970//ionotropic glutamate receptor activity;GO:0004972//NMDA glutamate receptor activity;GO:0005216//ion channel activity;GO:0005261//cation channel activity;GO:0005515//protein binding;GO:0015276//ligand-gated ion channel activity;GO:0022849//glutamate-gated calcium ion channel activity;GO:0030165//PDZ domain binding;GO:0038023//signaling receptor activity;GO:0047485//protein N-terminus b…	GO:0006811//ion transport;GO:0009611//response to wounding;GO:0019722//calcium-mediated signaling;GO:0033058//directional locomotion;GO:0035235//ionotropic glutamate receptor signaling pathway;GO:0042177//negative regulation of protein catabolic process;GO:0042391//regulation of membrane potential;GO:0048168//regulation of neuronal synaptic plasticity;GO:0050885//neuromuscular process controlling…	--
ENSMUSG00000020773	0.791	1.052	1.093	4.636	4.539	5.886	12	15	17	70	76	84	Trim47	tripartite motif-containing 47 [Source:MGI Symbol;Acc:MGI:1917374]	-	-	-	-	GO:0005634//nucleus;GO:0005737//cytoplasm;GO:0005829//cytosol	GO:0004842//ubiquitin-protein transferase activity;GO:0008270//zinc ion binding;GO:0016740//transferase activity;GO:0046872//metal ion binding	GO:0016567//protein ubiquitination	--
ENSMUSG00000020805	0.361	0.285	0.293	1.353	1.518	0.693	2	1	5	18	17	15	Slc13a5	solute carrier family 13 (sodium-dependent citrate transporter), member 5 [Source:MGI Symbol;Acc:MGI:3037150]	-	-	-	-	GO:0005654//nucleoplasm;GO:0005829//cytosol;GO:0005886//plasma membrane;GO:0016020//membrane;GO:0016323//basolateral plasma membrane	GO:0005343//organic acid:sodium symporter activity;GO:0015137//citrate transmembrane transporter activity;GO:0015141//succinate transmembrane transporter activity;GO:0015142//tricarboxylic acid transmembrane transporter activity;GO:0015293//symporter activity;GO:0017153//sodium:dicarboxylate symporter activity;GO:0022857//transmembrane transporter activity;GO:0042802//identical protein binding	GO:0006811//ion transport;GO:0006814//sodium ion transport;GO:0006842//tricarboxylic acid transport;GO:0015729//oxaloacetate transport;GO:0015741//fumarate transport;GO:0015742//alpha-ketoglutarate transport;GO:0015744//succinate transport;GO:0015746//citrate transport;GO:0035674//tricarboxylic acid transmembrane transport;GO:0055085//transmembrane transport;GO:0071285//cellular response to lithi…	--
ENSMUSG00000020806	0.201	0.129	0.157	0.728	0.802	0.771	5	3	4	18	22	18	Rhbdf2	rhomboid 5 homolog 2 [Source:MGI Symbol;Acc:MGI:2442473]	-	-	-	-	GO:0005783//endoplasmic reticulum;GO:0005789//endoplasmic reticulum membrane;GO:0005886//plasma membrane;GO:0016020//membrane;GO:0016021//integral component of membrane	GO:0004252//serine-type endopeptidase activity;GO:0005515//protein binding	GO:0015031//protein transport;GO:0042058//regulation of epidermal growth factor receptor signaling pathway;GO:0050708//regulation of protein secretion;GO:0050709//negative regulation of protein secretion;GO:0072659//protein localization to plasma membrane;GO:1904683//regulation of metalloendopeptidase activity	--
ENSMUSG00000020846	3.126	3.998	2.613	0.91	1.38	0.964	76	91	65	22	37	22	Rflnb	refilin B [Source:MGI Symbol;Acc:MGI:1923816]	-	-	-	-	GO:0005737//cytoplasm;GO:0005856//cytoskeleton;GO:0015629//actin cytoskeleton;GO:0032432//actin filament bundle	GO:0031005//filamin binding	GO:0001837//epithelial to mesenchymal transition;GO:0030036//actin cytoskeleton organization;GO:0048705//skeletal system morphogenesis;GO:0061181//regulation of chondrocyte development;GO:0061182//negative regulation of chondrocyte development;GO:0061572//actin filament bundle organization;GO:1900158//negative regulation of bone mineralization involved in bone maturation	--
ENSMUSG00000020866	1.068	0.882	1.077	2.458	2.438	2.604	59	46	62	136	150	136	Cacna1g	calcium channel, voltage-dependent, T type, alpha 1G subunit [Source:MGI Symbol;Acc:MGI:1201678]	Environmental Information Processing;Environmental Information Processing;Human Diseases;Organismal Systems;Organismal Systems;Organismal Systems;Organismal Systems;Human Diseases	Signal transduction;Signal transduction;Endocrine and metabolic disease;Endocrine system;Environmental adaptation;Endocrine system;Endocrine system;Endocrine and metabolic disease	ko04020//Calcium signaling pathway;ko04010//MAPK signaling pathway;ko04934//Cushing syndrome;ko04925//Aldosterone synthesis and secretion;ko04713//Circadian entrainment;ko04927//Cortisol synthesis and secretion;ko04929//GnRH secretion;ko04930//Type II diabetes mellitus	K04854;K04854;K04854;K04854;K04854;K04854;K04854;K04854	GO:0001518//voltage-gated sodium channel complex;GO:0005737//cytoplasm;GO:0005886//plasma membrane;GO:0005891//voltage-gated calcium channel complex;GO:0016020//membrane;GO:0030425//dendrite;GO:0043005//neuron projection;GO:0043025//neuronal cell body;GO:0044297//cell body;GO:0045202//synapse;GO:0048471//perinuclear region of cytoplasm	GO:0005216//ion channel activity;GO:0005244//voltage-gated ion channel activity;GO:0005245//voltage-gated calcium channel activity;GO:0005248//voltage-gated sodium channel activity;GO:0005261//cation channel activity;GO:0005262//calcium channel activity;GO:0005515//protein binding;GO:0008332//low voltage-gated calcium channel activity;GO:0086056//voltage-gated calcium channel activity involved in…	GO:0001508//action potential;GO:0002027//regulation of heart rate;GO:0003008//system process;GO:0006811//ion transport;GO:0006816//calcium ion transport;GO:0007204//positive regulation of cytosolic calcium ion concentration;GO:0007268//chemical synaptic transmission;GO:0010045//response to nickel cation;GO:0014824//artery smooth muscle contraction;GO:0019228//neuronal action potential;GO:0034765/…	--
ENSMUSG00000020905	0.68	0.692	0.603	0	0.029	0	21	20	19	0	1	0	Usp43	ubiquitin specific peptidase 43 [Source:MGI Symbol;Acc:MGI:2444541]	-	-	-	-	-	GO:0004843//thiol-dependent deubiquitinase;GO:0008233//peptidase activity;GO:0008234//cysteine-type peptidase activity;GO:0016787//hydrolase activity	GO:0006508//proteolysis;GO:0006511//ubiquitin-dependent protein catabolic process;GO:0016579//protein deubiquitination	--
ENSMUSG00000020926	19.53	20.05	21.268	8.733	8.826	8.115	687	660	764	298	337	266	Adam11	a disintegrin and metallopeptidase domain 11 [Source:MGI Symbol;Acc:MGI:1098667]	-	-	-	-	GO:0005886//plasma membrane;GO:0016020//membrane;GO:0030424//axon;GO:0042734//presynaptic membrane;GO:0042995//cell projection;GO:0043204//perikaryon;GO:0045202//synapse;GO:0110165//cellular anatomical entity	GO:0004222//metalloendopeptidase activity;GO:0005515//protein binding;GO:0008237//metallopeptidase activity	GO:0006508//proteolysis;GO:0033555//multicellular organismal response to stress;GO:0045184//establishment of protein localization;GO:0061367//behavioral response to acetic acid induced pain;GO:0061368//behavioral response to formalin induced pain	--
ENSMUSG00000020932	1679.27	1670.91	1686.68	641.662	638.252	637.657	30744	28643	31595	11680	12883	10958	Gfap	glial fibrillary acidic protein [Source:MGI Symbol;Acc:MGI:95697]	Environmental Information Processing	Signal transduction	ko04630//JAK-STAT signaling pathway	K05640	GO:0005737//cytoplasm;GO:0005856//cytoskeleton;GO:0005882//intermediate filament;GO:0016020//membrane;GO:0042995//cell projection;GO:0043209//myelin sheath;GO:0043229//intracellular organelle;GO:0044297//cell body;GO:0045111//intermediate filament cytoskeleton;GO:0097386//glial cell projection;GO:0097449//astrocyte projection;GO:0097450//astrocyte end-foot;GO:0098574//cytoplasmic side of lysosoma…	GO:0005178//integrin binding;GO:0005200//structural constituent of cytoskeleton;GO:0005515//protein binding;GO:0019900//kinase binding;GO:0042802//identical protein binding	GO:0006886//intracellular protein transport;GO:0009611//response to wounding;GO:0010467//gene expression;GO:0010625//positive regulation of Schwann cell proliferation;GO:0010977//negative regulation of neuron projection development;GO:0014002//astrocyte development;GO:0014010//Schwann cell proliferation;GO:0030198//extracellular matrix organization;GO:0031102//neuron projection regeneration;GO:00…	--
ENSMUSG00000021062	2.974	2.785	3.89	1.334	0.954	1.023	65	57	87	29	23	21	Rab15	RAB15, member RAS oncogene family [Source:MGI Symbol;Acc:MGI:1916865]	-	-	-	-	GO:0005737//cytoplasm;GO:0005929//cilium;GO:0010008//endosome membrane;GO:0048471//perinuclear region of cytoplasm	GO:0003924//GTPase activity;GO:0005525//GTP binding	GO:0032482//Rab protein signal transduction;GO:1903307//positive regulation of regulated secretory pathway	--
ENSMUSG00000021108	0.204	0	0.04	0.287	0.591	0.651	5	0	1	7	16	15	Prkch	protein kinase C, eta [Source:MGI Symbol;Acc:MGI:97600]	Organismal Systems;Organismal Systems	Circulatory system;Sensory system	ko04270//Vascular smooth muscle contraction;ko04750//Inflammatory mediator regulation of TRP channels	K18051;K18051	GO:0005737//cytoplasm;GO:0005829//cytosol;GO:0005886//plasma membrane;GO:0005911//cell-cell junction;GO:0016020//membrane	GO:0000166//nucleotide binding;GO:0004672//protein kinase activity;GO:0004674//protein serine/threonine kinase activity;GO:0004697//protein kinase C activity;GO:0004698//calcium-dependent protein kinase C activity;GO:0004699//calcium-independent protein kinase C activity;GO:0005515//protein binding;GO:0005524//ATP binding;GO:0016301//kinase activity;GO:0016740//transferase activity;GO:0019899//en…	GO:0006468//protein phosphorylation;GO:0010744//positive regulation of macrophage derived foam cell differentiation;GO:0016310//phosphorylation;GO:0017148//negative regulation of translation;GO:0018105//peptidyl-serine phosphorylation;GO:0030154//cell differentiation;GO:0032056//positive regulation of translation in response to stress;GO:0034198//cellular response to amino acid starvation;GO:0034…	--
ENSMUSG00000021194	16.956	17.7	18.147	5.478	5.706	6.293	221	216	242	71	82	77	Chga	chromogranin A [Source:MGI Symbol;Acc:MGI:88394]	-	-	-	-	GO:0005576//extracellular region;GO:0005615//extracellular space;GO:0030133//transport vesicle;GO:0030141//secretory granule;GO:0031410//cytoplasmic vesicle;GO:0042583//chromaffin granule;GO:0048471//perinuclear region of cytoplasm;GO:0098992//neuronal dense core vesicle	GO:0005515//protein binding	GO:0001934//positive regulation of protein phosphorylation;GO:0002026//regulation of the force of heart contraction;GO:0002551//mast cell chemotaxis;GO:0006996//organelle organization;GO:0033366//protein localization to secretory granule;GO:0033604//negative regulation of catecholamine secretion;GO:0042742//defense response to bacterium;GO:0043303//mast cell degranulation;GO:0043950//positive reg…	--
ENSMUSG00000021219	36.384	33.259	36.288	1.827	0.567	0.869	970	880	1013	24	13	9	Rgs6	regulator of G-protein signaling 6 [Source:MGI Symbol;Acc:MGI:1354730]	-	-	-	-	GO:0005634//nucleus;GO:0005737//cytoplasm;GO:0005794//Golgi apparatus;GO:0005829//cytosol;GO:0005886//plasma membrane;GO:0016020//membrane;GO:0019898//extrinsic component of membrane;GO:0032991//protein-containing complex;GO:0043005//neuron projection	GO:0005096//GTPase activator activity;GO:0005515//protein binding;GO:0019904//protein domain specific binding	GO:0007186//G protein-coupled receptor signaling pathway;GO:0008277//regulation of G protein-coupled receptor signaling pathway;GO:0009968//negative regulation of signal transduction;GO:0035556//intracellular signal transduction;GO:0043547//positive regulation of GTPase activity;GO:0045666//positive regulation of neuron differentiation	--
ENSMUSG00000021255	0.172	0.515	0.437	5.421	4.653	5.905	5	14	13	155	149	161	Esrrb	estrogen related receptor, beta [Source:MGI Symbol;Acc:MGI:1346832]	Cellular Processes	Cellular community - eukaryotes	ko04550//Signaling pathways regulating pluripotency of stem cells	K08553	GO:0000793//condensed chromosome;GO:0005634//nucleus;GO:0005654//nucleoplasm;GO:0005694//chromosome;GO:0005737//cytoplasm;GO:0005829//cytosol;GO:0032039//integrator complex	GO:0000978//RNA polymerase II cis-regulatory region sequence-specific DNA binding;GO:0000981//DNA-binding transcription factor activity, RNA polymerase II-specific;GO:0000987//cis-regulatory region sequence-specific DNA binding;GO:0000993//RNA polymerase II complex binding;GO:0001228//DNA-binding transcription activator activity, RNA polymerase II-specific;GO:0003676//nucleic acid binding;GO:0003…	GO:0001701//in utero embryonic development;GO:0001831//trophectodermal cellular morphogenesis;GO:0001834//trophectodermal cell proliferation;GO:0001892//embryonic placenta development;GO:0006351//transcription, DNA-templated;GO:0006355//regulation of transcription, DNA-templated;GO:0006357//regulation of transcription by RNA polymerase II;GO:0008283//cell population proliferation;GO:0017145//stem…	ESR-like
ENSMUSG00000021285	11.29	11.883	11.806	3.584	3.641	4.208	343	338	358	106	120	120	Ppp1r13b	protein phosphatase 1, regulatory subunit 13B [Source:MGI Symbol;Acc:MGI:1336199]	-	-	-	-	GO:0005634//nucleus;GO:0005654//nucleoplasm;GO:0005737//cytoplasm;GO:0005829//cytosol;GO:0005886//plasma membrane;GO:0048471//perinuclear region of cytoplasm	GO:0002039//p53 binding;GO:0005515//protein binding;GO:0008134//transcription factor binding	GO:0006915//apoptotic process;GO:0045786//negative regulation of cell cycle;GO:0072332//intrinsic apoptotic signaling pathway by p53 class mediator;GO:1901216//positive regulation of neuron death	--
ENSMUSG00000021294	5.012	4.305	4.184	0.693	1.042	0.667	240	193	205	33	55	30	Kif26a	kinesin family member 26A [Source:MGI Symbol;Acc:MGI:2447072]	-	-	-	-	GO:0005737//cytoplasm;GO:0005856//cytoskeleton;GO:0005871//kinesin complex;GO:0005874//microtubule	GO:0000166//nucleotide binding;GO:0003777//microtubule motor activity;GO:0005515//protein binding;GO:0005524//ATP binding;GO:0008017//microtubule binding	GO:0001560//regulation of cell growth by extracellular stimulus;GO:0007018//microtubule-based movement;GO:0009968//negative regulation of signal transduction;GO:0048484//enteric nervous system development	--
ENSMUSG00000021301	0.657	0.61	0.537	0.024	0.014	0	43	30	33	1	1	0	Hecw1	HECT, C2 and WW domain containing E3 ubiquitin protein ligase 1 [Source:MGI Symbol;Acc:MGI:2444115]	-	-	-	-	GO:0005737//cytoplasm;GO:0005829//cytosol	GO:0004842//ubiquitin-protein transferase activity;GO:0005515//protein binding;GO:0016740//transferase activity;GO:0061630//ubiquitin protein ligase activity	GO:0000209//protein polyubiquitination;GO:0016567//protein ubiquitination;GO:0043161//proteasome-mediated ubiquitin-dependent protein catabolic process;GO:0048814//regulation of dendrite morphogenesis;GO:2000650//negative regulation of sodium ion transmembrane transporter activity	--
ENSMUSG00000021303	8.362	8.834	9.194	0.777	0.701	0.678	184	182	207	17	17	14	Gng4	guanine nucleotide binding protein (G protein), gamma 4 [Source:MGI Symbol;Acc:MGI:102703]	Human Diseases;Environmental Information Processing;Human Diseases;Human Diseases;Environmental Information Processing;Human Diseases;Human Diseases;Organismal Systems;Organismal Systems;Organismal Systems;Environmental Information Processing;Organismal Systems;Organismal Systems;Organismal Systems;Organismal Systems;Organismal Systems;Human Diseases;Organismal Systems	Cancer: overview;Signal transduction;Infectious disease: viral;Infectious disease: viral;Signal transduction;Infectious disease: viral;Substance dependence;Immune system;Nervous system;Nervous system;Signal transduction;Endocrine system;Nervous system;Nervous system;Nervous system;Environmental adaptation;Substance dependence;Nervous system	ko05200//Pathways in cancer;ko04151//PI3K-Akt signaling pathway;ko05163//Human cytomegalovirus infection;ko05170//Human immunodeficiency virus 1 infection;ko04014//Ras signaling pathway;ko05167//Kaposi sarcoma-associated herpesvirus infection;ko05034//Alcoholism;ko04062//Chemokine signaling pathway;ko04723//Retrograde endocannabinoid signaling;ko04726//Serotonergic synapse;ko04371//Apelin signali…	K04541;K04541;K04541;K04541;K04541;K04541;K04541;K04541;K04541;K04541;K04541;K04541;K04541;K04541;K04541;K04541;K04541;K04541	GO:0005834//heterotrimeric G-protein complex;GO:0005886//plasma membrane;GO:0016020//membrane	GO:0003924//GTPase activity;GO:0031681//G-protein beta-subunit binding	GO:0007165//signal transduction;GO:0007186//G protein-coupled receptor signaling pathway;GO:0030308//negative regulation of cell growth	--
ENSMUSG00000025407	4.019	5.711	4.082	10.389	8.542	8.807	220	231	222	552	517	454	Gli1	GLI-Kruppel family member GLI1 [Source:MGI Symbol;Acc:MGI:95727]	Human Diseases;Environmental Information Processing;Environmental Information Processing;Human Diseases	Cancer: overview;Signal transduction;Signal transduction;Cancer: specific types	ko05200//Pathways in cancer;ko04024//cAMP signaling pathway;ko04340//Hedgehog signaling pathway;ko05217//Basal cell carcinoma	K16797	GO:0005634//nucleus;GO:0005654//nucleoplasm;GO:0005730//nucleolus;GO:0005737//cytoplasm;GO:0005829//cytosol;GO:0005929//cilium;GO:0005930//axoneme;GO:0016020//membrane;GO:0016607//nuclear speck;GO:0017053//transcription repressor complex;GO:0042995//cell projection;GO:0043231//intracellular membrane-bounded organelle;GO:1990788//GLI-SUFU complex	GO:0000977//RNA polymerase II transcription regulatory region sequence-specific DNA binding;GO:0000978//RNA polymerase II cis-regulatory region sequence-specific DNA binding;GO:0000981//DNA-binding transcription factor activity, RNA polymerase II-specific;GO:0003677//DNA binding;GO:0003682//chromatin binding;GO:0003700//DNA-binding transcription factor activity;GO:0005515//protein binding;GO:0008…	GO:0000122//negative regulation of transcription by RNA polymerase II;GO:0001649//osteoblast differentiation;GO:0001656//metanephros development;GO:0001658//branching involved in ureteric bud morphogenesis;GO:0001701//in utero embryonic development;GO:0001822//kidney development;GO:0002052//positive regulation of neuroblast proliferation;GO:0002062//chondrocyte differentiation;GO:0006355//regulat…	zf-C2H2
ENSMUSG00000021360	0.68	0.555	0.702	1.547	1.807	1.344	19	15	20	43	56	33	Gcnt2	glucosaminyl (N-acetyl) transferase 2, I-branching enzyme [Source:MGI Symbol;Acc:MGI:1100870]	Metabolism;Metabolism	Global and overview maps;Glycan biosynthesis and metabolism	ko01100//Metabolic pathways;ko00601//Glycosphingolipid biosynthesis - lacto and neolacto series	K00742;K00742	GO:0000139//Golgi membrane;GO:0005794//Golgi apparatus;GO:0016020//membrane	GO:0008109//N-acetyllactosaminide beta-1,6-N-acetylglucosaminyltransferase activity;GO:0008375//acetylglucosaminyltransferase activity;GO:0016740//transferase activity;GO:0016757//glycosyltransferase activity	GO:0006486//protein glycosylation;GO:0007179//transforming growth factor beta receptor signaling pathway;GO:0008284//positive regulation of cell population proliferation;GO:0010608//posttranscriptional regulation of gene expression;GO:0010718//positive regulation of epithelial to mesenchymal transition;GO:0010812//negative regulation of cell-substrate adhesion;GO:0030335//positive regulation of c…	--
ENSMUSG00000021379	130.468	125.761	130.303	27.103	27.78	28.55	3476	3137	3552	718	816	714	Id4	inhibitor of DNA binding 4 [Source:MGI Symbol;Acc:MGI:99414]	Cellular Processes;Environmental Information Processing	Cellular community - eukaryotes;Signal transduction	ko04550//Signaling pathways regulating pluripotency of stem cells;ko04350//TGF-beta signaling pathway	K17695;K17695	GO:0005634//nucleus;GO:0005654//nucleoplasm;GO:0005737//cytoplasm	GO:0005515//protein binding;GO:0046983//protein dimerization activity;GO:0061629//RNA polymerase II-specific DNA-binding transcription factor binding;GO:0140416//transcription regulator inhibitor activity	GO:0000082//G1/S transition of mitotic cell cycle;GO:0000122//negative regulation of transcription by RNA polymerase II;GO:0001649//osteoblast differentiation;GO:0002052//positive regulation of neuroblast proliferation;GO:0007405//neuroblast proliferation;GO:0007420//brain development;GO:0007623//circadian rhythm;GO:0008104//protein localization;GO:0008283//cell population proliferation;GO:000828…	bHLH
ENSMUSG00000021457	0.819	0.882	0.827	3.08	3.16	2.615	30	27	30	108	120	87	Syk	spleen tyrosine kinase [Source:MGI Symbol;Acc:MGI:99515]	Human Diseases;Environmental Information Processing;Human Diseases;Human Diseases;Organismal Systems;Human Diseases;Environmental Information Processing;Organismal Systems;Environmental Information Processing;Human Diseases;Human Diseases;Organismal Systems;Organismal Systems;Organismal Systems;Organismal Systems;Organismal Systems;Organismal Systems	Infectious disease: viral;Signal transduction;Infectious disease: viral;Infectious disease: viral;Immune system;Infectious disease: bacterial;Signal transduction;Immune system;Signal transduction;Infectious disease: viral;Cancer: overview;Immune system;Immune system;Immune system;Development and regeneration;Immune system;Immune system	ko05168//Herpes simplex virus 1 infection;ko04151//PI3K-Akt signaling pathway;ko05171//Coronavirus disease - COVID-19;ko05169//Epstein-Barr virus infection;ko04613//Neutrophil extracellular trap formation;ko05152//Tuberculosis;ko04072//Phospholipase D signaling pathway;ko04650//Natural killer cell mediated cytotoxicity;ko04064//NF-kappa B signaling pathway;ko05167//Kaposi sarcoma-associated herpe…	K05855;K05855;K05855;K05855;K05855;K05855;K05855;K05855;K05855;K05855;K05855;K05855;K05855;K05855;K05855;K05855;K05855	GO:0005634//nucleus;GO:0005737//cytoplasm;GO:0005829//cytosol;GO:0005886//plasma membrane;GO:0016020//membrane;GO:0019815//B cell receptor complex;GO:0031234//extrinsic component of cytoplasmic side of plasma membrane;GO:0031410//cytoplasmic vesicle;GO:0032009//early phagosome;GO:0032991//protein-containing complex;GO:0042101//T cell receptor complex;GO:0045335//phagocytic vesicle	GO:0000166//nucleotide binding;GO:0001784//phosphotyrosine residue binding;GO:0004672//protein kinase activity;GO:0004674//protein serine/threonine kinase activity;GO:0004713//protein tyrosine kinase activity;GO:0004715//non-membrane spanning protein tyrosine kinase activity;GO:0005102//signaling receptor binding;GO:0005178//integrin binding;GO:0005515//protein binding;GO:0005524//ATP binding;GO:…	GO:0001525//angiogenesis;GO:0001775//cell activation;GO:0001819//positive regulation of cytokine production;GO:0001820//serotonin secretion;GO:0001945//lymph vessel development;GO:0002092//positive regulation of receptor internalization;GO:0002223//stimulatory C-type lectin receptor signaling pathway;GO:0002250//adaptive immune response;GO:0002281//macrophage activation involved in immune respons…	--
ENSMUSG00000021478	0.123	0.131	0.24	0.948	1.301	1.004	3	3	6	23	35	23	Drd1	dopamine receptor D1 [Source:MGI Symbol;Acc:MGI:99578]	Environmental Information Processing;Environmental Information Processing;Human Diseases;Environmental Information Processing;Human Diseases;Organismal Systems;Human Diseases;Cellular Processes;Human Diseases;Human Diseases	Signaling molecules and interaction;Signal transduction;Neurodegenerative disease;Signal transduction;Substance dependence;Nervous system;Substance dependence;Cellular community - eukaryotes;Substance dependence;Substance dependence	ko04080//Neuroactive ligand-receptor interaction;ko04020//Calcium signaling pathway;ko05012//Parkinson disease;ko04024//cAMP signaling pathway;ko05034//Alcoholism;ko04728//Dopaminergic synapse;ko05032//Morphine addiction;ko04540//Gap junction;ko05031//Amphetamine addiction;ko05030//Cocaine addiction	K04144;K04144;K04144;K04144;K04144;K04144;K04144;K04144;K04144;K04144	GO:0005634//nucleus;GO:0005737//cytoplasm;GO:0005783//endoplasmic reticulum;GO:0005789//endoplasmic reticulum membrane;GO:0005886//plasma membrane;GO:0005887//integral component of plasma membrane;GO:0005901//caveola;GO:0005929//cilium;GO:0009986//cell surface;GO:0012505//endomembrane system;GO:0016020//membrane;GO:0016021//integral component of membrane;GO:0030424//axon;GO:0030425//dendrite;GO:0…	GO:0001588//dopamine neurotransmitter receptor activity, coupled via Gs;GO:0001965//G-protein alpha-subunit binding;GO:0004930//G protein-coupled receptor activity;GO:0004952//dopamine neurotransmitter receptor activity;GO:0005102//signaling receptor binding;GO:0005515//protein binding;GO:0019903//protein phosphatase binding;GO:0031701//angiotensin receptor binding;GO:0031750//D3 dopamine recepto…	GO:0001659//temperature homeostasis;GO:0001661//conditioned taste aversion;GO:0001662//behavioral fear response;GO:0001764//neuron migration;GO:0001932//regulation of protein phosphorylation;GO:0001934//positive regulation of protein phosphorylation;GO:0001963//synaptic transmission, dopaminergic;GO:0001975//response to amphetamine;GO:0006468//protein phosphorylation;GO:0006469//negative regulati…	--
ENSMUSG00000021509	2.227	3.018	2.344	0.086	0	0.274	52	66	56	2	0	6	Slc25a48	solute carrier family 25, member 48 [Source:MGI Symbol;Acc:MGI:2145373]	-	-	-	-	GO:0005739//mitochondrion;GO:0005743//mitochondrial inner membrane;GO:0016020//membrane	GO:0022857//transmembrane transporter activity	GO:0055085//transmembrane transport	--
ENSMUSG00000021573	52.65	48.353	48.601	5.652	6.204	6.682	1855	1595	1752	198	241	221	Tppp	tubulin polymerization promoting protein [Source:MGI Symbol;Acc:MGI:1920198]	-	-	-	-	GO:0005634//nucleus;GO:0005737//cytoplasm;GO:0005739//mitochondrion;GO:0005794//Golgi apparatus;GO:0005819//spindle;GO:0005829//cytosol;GO:0005856//cytoskeleton;GO:0005874//microtubule;GO:0043209//myelin sheath;GO:0048471//perinuclear region of cytoplasm;GO:0072686//mitotic spindle;GO:0097427//microtubule bundle;GO:0150051//postsynaptic Golgi apparatus	GO:0000287//magnesium ion binding;GO:0003924//GTPase activity;GO:0008017//microtubule binding;GO:0015631//tubulin binding;GO:0016787//hydrolase activity;GO:0042803//protein homodimerization activity;GO:0046872//metal ion binding	GO:0001578//microtubule bundle formation;GO:0007049//cell cycle;GO:0014003//oligodendrocyte development;GO:0030953//astral microtubule organization;GO:0031334//positive regulation of protein-containing complex assembly;GO:0031643//positive regulation of myelination;GO:0032273//positive regulation of protein polymerization;GO:0032288//myelin assembly;GO:0046785//microtubule polymerization;GO:00487…	--
ENSMUSG00000021585	6.705	6.726	5.092	2.289	2.554	2.697	130.37	123.64	132.66	51.98	73.22	57	Cast	calpastatin [Source:MGI Symbol;Acc:MGI:1098236]	Human Diseases	Infectious disease: bacterial	ko05131//Shigellosis	K04281	GO:0005634//nucleus;GO:0005737//cytoplasm;GO:0005783//endoplasmic reticulum;GO:0005829//cytosol;GO:0014069//postsynaptic density;GO:0016020//membrane	GO:0002020//protease binding;GO:0004869//cysteine-type endopeptidase inhibitor activity;GO:0010859//calcium-dependent cysteine-type endopeptidase inhibitor activity;GO:0030414//peptidase inhibitor activity	GO:0007343//egg activation;GO:0010466//negative regulation of peptidase activity;GO:0030163//protein catabolic process;GO:0043086//negative regulation of catalytic activity;GO:0051726//regulation of cell cycle;GO:0097340//inhibition of cysteine-type endopeptidase activity;GO:2000675//negative regulation of type B pancreatic cell apoptotic process	--
ENSMUSG00000021662	24.39	23.889	23.945	3.478	3.447	3.137	909	834	913	121	133	103	Arhgef28	Rho guanine nucleotide exchange factor (GEF) 28 [Source:MGI Symbol;Acc:MGI:1346016]	Human Diseases	Infectious disease: bacterial	ko05135//Yersinia infection	K21072	GO:0005737//cytoplasm	GO:0005085//guanyl-nucleotide exchange factor activity;GO:0046872//metal ion binding	-	--
ENSMUSG00000021684	17.058	14.589	15.599	2.488	2.186	2.738	400	323	380	48	52	53	Pde8b	phosphodiesterase 8B [Source:MGI Symbol;Acc:MGI:2443999]	Metabolism;Human Diseases;Metabolism;Human Diseases;Organismal Systems	Global and overview maps;Endocrine and metabolic disease;Nucleotide metabolism;Substance dependence;Endocrine system	ko01100//Metabolic pathways;ko04934//Cushing syndrome;ko00230//Purine metabolism;ko05032//Morphine addiction;ko04927//Cortisol synthesis and secretion	K18437;K18437;K18437;K18437;K18437	GO:0005575//cellular_component	GO:0004114//3',5'-cyclic-nucleotide phosphodiesterase activity;GO:0004115//3',5'-cyclic-AMP phosphodiesterase activity;GO:0008081//phosphoric diester hydrolase activity;GO:0016787//hydrolase activity;GO:0046872//metal ion binding	GO:0001662//behavioral fear response;GO:0006198//cAMP catabolic process;GO:0007165//signal transduction;GO:0008542//visual learning;GO:0035106//operant conditioning;GO:0046676//negative regulation of insulin secretion;GO:0050885//neuromuscular process controlling balance;GO:0061179//negative regulation of insulin secretion involved in cellular response to glucose stimulus;GO:0090032//negative reg…	--
ENSMUSG00000021699	53.476	53.53	56.674	23.167	21.991	22.123	1127	1064	1197	482	542	444	Pde4d	phosphodiesterase 4D, cAMP specific [Source:MGI Symbol;Acc:MGI:99555]	Metabolism;Environmental Information Processing;Metabolism;Organismal Systems;Human Diseases	Global and overview maps;Signal transduction;Nucleotide metabolism;Endocrine system;Substance dependence	ko01100//Metabolic pathways;ko04024//cAMP signaling pathway;ko00230//Purine metabolism;ko04928//Parathyroid hormone synthesis, secretion and action;ko05032//Morphine addiction	K13293;K13293;K13293;K13293;K13293	GO:0005634//nucleus;GO:0005737//cytoplasm;GO:0005794//Golgi apparatus;GO:0005813//centrosome;GO:0005815//microtubule organizing center;GO:0005829//cytosol;GO:0005856//cytoskeleton;GO:0005886//plasma membrane;GO:0005891//voltage-gated calcium channel complex;GO:0016020//membrane;GO:0016324//apical plasma membrane;GO:0030016//myofibril;GO:0032991//protein-containing complex;GO:0034704//calcium chan…	GO:0004112//cyclic-nucleotide phosphodiesterase activity;GO:0004114//3',5'-cyclic-nucleotide phosphodiesterase activity;GO:0004115//3',5'-cyclic-AMP phosphodiesterase activity;GO:0005515//protein binding;GO:0008081//phosphoric diester hydrolase activity;GO:0016787//hydrolase activity;GO:0019899//enzyme binding;GO:0030552//cAMP binding;GO:0031698//beta-2 adrenergic receptor binding;GO:0044325//tra…	GO:0001934//positive regulation of protein phosphorylation;GO:0002027//regulation of heart rate;GO:0006198//cAMP catabolic process;GO:0006939//smooth muscle contraction;GO:0007165//signal transduction;GO:0007568//aging;GO:0007613//memory;GO:0008277//regulation of G protein-coupled receptor signaling pathway;GO:0010469//regulation of signaling receptor activity;GO:0010880//regulation of release of…	--
ENSMUSG00000021708	0.893	1.033	0.909	0.019	0.203	0.02	48	52	50	1	12	1	Rasgrf2	RAS protein-specific guanine nucleotide-releasing factor 2 [Source:MGI Symbol;Acc:MGI:109137]	Environmental Information Processing;Environmental Information Processing	Signal transduction;Signal transduction	ko04010//MAPK signaling pathway;ko04014//Ras signaling pathway	K12326;K12326	GO:0005737//cytoplasm;GO:0005783//endoplasmic reticulum;GO:0005789//endoplasmic reticulum membrane;GO:0005886//plasma membrane;GO:0016020//membrane	GO:0005085//guanyl-nucleotide exchange factor activity;GO:0005515//protein binding;GO:0005516//calmodulin binding	GO:0007264//small GTPase mediated signal transduction;GO:0007265//Ras protein signal transduction;GO:0034976//response to endoplasmic reticulum stress;GO:0035023//regulation of Rho protein signal transduction;GO:0043547//positive regulation of GTPase activity;GO:0046578//regulation of Ras protein signal transduction;GO:0060291//long-term synaptic potentiation;GO:0065008//regulation of biological …	--
ENSMUSG00000021728	3.905	4.593	4.396	1.292	1.3	1.632	79	87	91	26	29	31	Emb	embigin [Source:MGI Symbol;Acc:MGI:95321]	-	-	-	-	GO:0005886//plasma membrane;GO:0016020//membrane;GO:0030424//axon;GO:0045202//synapse	GO:0005515//protein binding;GO:0098632//cell-cell adhesion mediator activity	GO:0007155//cell adhesion;GO:0007156//homophilic cell adhesion via plasma membrane adhesion molecules;GO:0007411//axon guidance;GO:0035879//plasma membrane lactate transport;GO:0070593//dendrite self-avoidance	--
ENSMUSG00000021730	0.143	0.109	0.24	0.051	0.019	0.098	14	10	24	5	2	9	Hcn1	hyperpolarization activated cyclic nucleotide gated potassium channel 1 [Source:MGI Symbol;Acc:MGI:1096392]	Organismal Systems	Endocrine system	ko04929//GnRH secretion	K04954	GO:0005737//cytoplasm;GO:0005886//plasma membrane;GO:0005887//integral component of plasma membrane;GO:0009986//cell surface;GO:0016020//membrane;GO:0016323//basolateral plasma membrane;GO:0030424//axon;GO:0030425//dendrite;GO:0032590//dendrite membrane;GO:0036477//somatodendritic compartment;GO:0043025//neuronal cell body;GO:0043198//dendritic shaft;GO:0043679//axon terminus;GO:0045202//synapse;…	GO:0000166//nucleotide binding;GO:0005216//ion channel activity;GO:0005222//intracellular cAMP-activated cation channel activity;GO:0005244//voltage-gated ion channel activity;GO:0005248//voltage-gated sodium channel activity;GO:0005249//voltage-gated potassium channel activity;GO:0005267//potassium channel activity;GO:0005272//sodium channel activity;GO:0005515//protein binding;GO:0005546//phosp…	GO:0003254//regulation of membrane depolarization;GO:0006811//ion transport;GO:0006813//potassium ion transport;GO:0006814//sodium ion transport;GO:0019228//neuronal action potential;GO:0034765//regulation of ion transmembrane transport;GO:0035725//sodium ion transmembrane transport;GO:0042391//regulation of membrane potential;GO:0045176//apical protein localization;GO:0045759//negative regulatio…	--
ENSMUSG00000021732	0.105	0	0.069	1.165	0.86	1.01	3	0	2	33	27	27	Fgf10	fibroblast growth factor 10 [Source:MGI Symbol;Acc:MGI:1099809]	Human Diseases;Environmental Information Processing;Environmental Information Processing;Environmental Information Processing;Environmental Information Processing;Cellular Processes;Environmental Information Processing;Human Diseases;Human Diseases;Human Diseases;Human Diseases	Cancer: overview;Signal transduction;Signal transduction;Signal transduction;Signal transduction;Cell motility;Signal transduction;Cancer: overview;Cancer: specific types;Cancer: specific types;Cancer: specific types	ko05200//Pathways in cancer;ko04151//PI3K-Akt signaling pathway;ko04020//Calcium signaling pathway;ko04010//MAPK signaling pathway;ko04014//Ras signaling pathway;ko04810//Regulation of actin cytoskeleton;ko04015//Rap1 signaling pathway;ko05207//Chemical carcinogenesis - receptor activation;ko05226//Gastric cancer;ko05224//Breast cancer;ko05218//Melanoma	K04358;K04358;K04358;K04358;K04358;K04358;K04358;K04358;K04358;K04358;K04358	GO:0005576//extracellular region;GO:0005615//extracellular space;GO:0005634//nucleus;GO:0005737//cytoplasm;GO:0005886//plasma membrane;GO:0009986//cell surface;GO:0062023//collagen-containing extracellular matrix	GO:0005104//fibroblast growth factor receptor binding;GO:0005111//type 2 fibroblast growth factor receptor binding;GO:0005515//protein binding;GO:0008083//growth factor activity;GO:0008201//heparin binding;GO:0042056//chemoattractant activity	GO:0000132//establishment of mitotic spindle orientation;GO:0000278//mitotic cell cycle;GO:0001525//angiogenesis;GO:0001656//metanephros development;GO:0001759//organ induction;GO:0001823//mesonephros development;GO:0001934//positive regulation of protein phosphorylation;GO:0001935//endothelial cell proliferation;GO:0001938//positive regulation of endothelial cell proliferation;GO:0001974//blood …	--
ENSMUSG00000021743	0.297	0.282	0.645	0.066	0	0	5	4	10	1	0	0	Fezf2	Fez family zinc finger 2 [Source:MGI Symbol;Acc:MGI:1859823]	-	-	-	-	GO:0005634//nucleus	GO:0000976//transcription cis-regulatory region binding;GO:0000978//RNA polymerase II cis-regulatory region sequence-specific DNA binding;GO:0000981//DNA-binding transcription factor activity, RNA polymerase II-specific;GO:0001227//DNA-binding transcription repressor activity, RNA polymerase II-specific;GO:0001228//DNA-binding transcription activator activity, RNA polymerase II-specific;GO:000367…	GO:0000122//negative regulation of transcription by RNA polymerase II;GO:0006355//regulation of transcription, DNA-templated;GO:0007399//nervous system development;GO:0007413//axonal fasciculation;GO:0007626//locomotory behavior;GO:0008285//negative regulation of cell population proliferation;GO:0016358//dendrite development;GO:0021537//telencephalon development;GO:0021542//dentate gyrus developm…	zf-C2H2
ENSMUSG00000021763	1.144	1.369	2.168	0.513	0.843	0.967	60	64	80	24	45	52	Cspg4b	chondroitin sulfate proteoglycan 4B [Source:MGI Symbol;Acc:MGI:3040697]	-	-	-	-	GO:0016020//membrane	GO:0003674//molecular_function	-	--
ENSMUSG00000021765	0.964	0.948	0.783	2.819	3.172	2.983	12	12	13	39	41	34	Fst	follistatin [Source:MGI Symbol;Acc:MGI:95586]	Environmental Information Processing	Signal transduction	ko04350//TGF-beta signaling pathway	K04661	GO:0005576//extracellular region;GO:0005615//extracellular space;GO:0005634//nucleus;GO:0005737//cytoplasm	GO:0005515//protein binding;GO:0038102//activin receptor antagonist activity;GO:0043395//heparan sulfate proteoglycan binding;GO:0048185//activin binding	GO:0000122//negative regulation of transcription by RNA polymerase II;GO:0001501//skeletal system development;GO:0002244//hematopoietic progenitor cell differentiation;GO:0007276//gamete generation;GO:0007389//pattern specification process;GO:0008585//female gonad development;GO:0014070//response to organic cyclic compound;GO:0030154//cell differentiation;GO:0030509//BMP signaling pathway;GO:0030…	--
ENSMUSG00000021779	11.105	10.962	11.656	5.966	4.804	5.826	305	291	359	179	195	170	Thrb	thyroid hormone receptor beta [Source:MGI Symbol;Acc:MGI:98743]	Environmental Information Processing;Organismal Systems	Signaling molecules and interaction;Endocrine system	ko04080//Neuroactive ligand-receptor interaction;ko04919//Thyroid hormone signaling pathway	K08362;K08362	GO:0005634//nucleus;GO:0016604//nuclear body;GO:0090575//RNA polymerase II transcription regulator complex	GO:0000978//RNA polymerase II cis-regulatory region sequence-specific DNA binding;GO:0001223//transcription coactivator binding;GO:0003677//DNA binding;GO:0003682//chromatin binding;GO:0003690//double-stranded DNA binding;GO:0003700//DNA-binding transcription factor activity;GO:0004879//nuclear receptor activity;GO:0005515//protein binding;GO:0008270//zinc ion binding;GO:0019899//enzyme binding;G…	GO:0000122//negative regulation of transcription by RNA polymerase II;GO:0002154//thyroid hormone mediated signaling pathway;GO:0002157//positive regulation of thyroid hormone mediated signaling pathway;GO:0006351//transcription, DNA-templated;GO:0006355//regulation of transcription, DNA-templated;GO:0006357//regulation of transcription by RNA polymerase II;GO:0007605//sensory perception of sound…	THR-like
ENSMUSG00000021803	0.133	0.036	0.163	0.906	0.998	0.888	4	1	5	27	33	25	Cdhr1	cadherin-related family member 1 [Source:MGI Symbol;Acc:MGI:2157782]	-	-	-	-	GO:0005886//plasma membrane;GO:0016020//membrane;GO:0042622//photoreceptor outer segment membrane	GO:0005509//calcium ion binding;GO:0005515//protein binding	GO:0007155//cell adhesion;GO:0007156//homophilic cell adhesion via plasma membrane adhesion molecules;GO:0008594//photoreceptor cell morphogenesis;GO:0035845//photoreceptor cell outer segment organization;GO:0045494//photoreceptor cell maintenance;GO:0098609//cell-cell adhesion	--
ENSMUSG00000021835	43.24	43.76	42.504	4.928	5.009	3.877	578	571	574	70	71	48	Bmp4	bone morphogenetic protein 4 [Source:MGI Symbol;Acc:MGI:88180]	Human Diseases;Environmental Information Processing;Environmental Information Processing;Human Diseases;Cellular Processes;Organismal Systems;Environmental Information Processing;Environmental Information Processing;Human Diseases;Environmental Information Processing	Cancer: overview;Signaling molecules and interaction;Signal transduction;Cardiovascular disease;Cellular community - eukaryotes;Endocrine system;Signal transduction;Signal transduction;Cancer: specific types;Signal transduction	ko05200//Pathways in cancer;ko04060//Cytokine-cytokine receptor interaction;ko04390//Hippo signaling pathway;ko05418//Fluid shear stress and atherosclerosis;ko04550//Signaling pathways regulating pluripotency of stem cells;ko04919//Thyroid hormone signaling pathway;ko04350//TGF-beta signaling pathway;ko04013//MAPK signaling pathway - fly;ko05217//Basal cell carcinoma;ko04341//Hedgehog signaling p…	K04662;K04662;K04662;K04662;K04662;K04662;K04662;K04662;K04662;K04662	GO:0005576//extracellular region;GO:0005615//extracellular space;GO:0005737//cytoplasm;GO:0031982//vesicle	GO:0005125//cytokine activity;GO:0005515//protein binding;GO:0008083//growth factor activity;GO:0008201//heparin binding;GO:0039706//co-receptor binding;GO:0042056//chemoattractant activity;GO:0042802//identical protein binding;GO:0070700//BMP receptor binding	GO:0000122//negative regulation of transcription by RNA polymerase II;GO:0001501//skeletal system development;GO:0001503//ossification;GO:0001525//angiogenesis;GO:0001541//ovarian follicle development;GO:0001568//blood vessel development;GO:0001649//osteoblast differentiation;GO:0001656//metanephros development;GO:0001657//ureteric bud development;GO:0001658//branching involved in ureteric bud mo…	--
ENSMUSG00000021848	11.231	10.03	9.767	21.689	22.535	20.601	122	103	110	260	273	233	Otx2	orthodenticle homeobox 2 [Source:MGI Symbol;Acc:MGI:97451]	-	-	-	-	GO:0005634//nucleus;GO:0030426//growth cone;GO:0032991//protein-containing complex	GO:0000978//RNA polymerase II cis-regulatory region sequence-specific DNA binding;GO:0000981//DNA-binding transcription factor activity, RNA polymerase II-specific;GO:0001228//DNA-binding transcription activator activity, RNA polymerase II-specific;GO:0003677//DNA binding;GO:0003700//DNA-binding transcription factor activity;GO:1990837//sequence-specific double-stranded DNA binding	GO:0006355//regulation of transcription, DNA-templated;GO:0006357//regulation of transcription by RNA polymerase II;GO:0007275//multicellular organism development;GO:0007411//axon guidance;GO:0045944//positive regulation of transcription by RNA polymerase II;GO:0065003//protein-containing complex assembly;GO:0071542//dopaminergic neuron differentiation	TF_Otx
ENSMUSG00000021866	9.173	9.475	8.68	3.035	1.97	2.7	152	147	144	50	36	42	Anxa11	annexin A11 [Source:MGI Symbol;Acc:MGI:108481]	Human Diseases	Neurodegenerative disease	ko05014//Amyotrophic lateral sclerosis	K17095	GO:0005634//nucleus;GO:0005635//nuclear envelope;GO:0005654//nucleoplasm;GO:0005737//cytoplasm;GO:0005819//spindle;GO:0005829//cytosol;GO:0005856//cytoskeleton;GO:0030496//midbody;GO:0042470//melanosome;GO:0042581//specific granule;GO:0042582//azurophil granule;GO:0045335//phagocytic vesicle;GO:0062023//collagen-containing extracellular matrix	GO:0005509//calcium ion binding;GO:0005544//calcium-dependent phospholipid binding;GO:0008429//phosphatidylethanolamine binding;GO:0044548//S100 protein binding;GO:0048306//calcium-dependent protein binding	GO:0006909//phagocytosis;GO:0007049//cell cycle;GO:0032506//cytokinetic process;GO:0051301//cell division;GO:0051592//response to calcium ion	--
ENSMUSG00000021892	21.692	24.734	24.883	9.105	9.138	9.777	403	424	473	164	184	166	Sh3bp5	SH3-domain binding protein 5 (BTK-associated) [Source:MGI Symbol;Acc:MGI:1344391]	-	-	-	-	GO:0005654//nucleoplasm;GO:0005737//cytoplasm;GO:0005739//mitochondrion;GO:0016020//membrane;GO:0016604//nuclear body;GO:0030659//cytoplasmic vesicle membrane;GO:0031410//cytoplasmic vesicle	GO:0004860//protein kinase inhibitor activity;GO:0005085//guanyl-nucleotide exchange factor activity;GO:0017124//SH3 domain binding	GO:0006469//negative regulation of protein kinase activity;GO:0035556//intracellular signal transduction;GO:0061099//negative regulation of protein tyrosine kinase activity	--
ENSMUSG00000021895	2.665	2.524	2.537	7.988	8.117	8.072	65	57	65	193	215	183	Arhgef3	Rho guanine nucleotide exchange factor (GEF) 3 [Source:MGI Symbol;Acc:MGI:1918954]	-	-	-	-	GO:0005737//cytoplasm	GO:0005085//guanyl-nucleotide exchange factor activity	GO:0035025//positive regulation of Rho protein signal transduction;GO:0035556//intracellular signal transduction	--
ENSMUSG00000021943	0.61	0.385	0.813	0.307	0.101	0.295	22	13	30	11	4	10	Gdf10	growth differentiation factor 10 [Source:MGI Symbol;Acc:MGI:95684]	Environmental Information Processing	Signaling molecules and interaction	ko04060//Cytokine-cytokine receptor interaction	K22674	GO:0005576//extracellular region;GO:0005615//extracellular space	GO:0005125//cytokine activity;GO:0008083//growth factor activity	GO:0001503//ossification;GO:0001649//osteoblast differentiation;GO:0010862//positive regulation of pathway-restricted SMAD protein phosphorylation;GO:0021549//cerebellum development;GO:0030278//regulation of ossification;GO:0042698//ovulation cycle;GO:0045444//fat cell differentiation;GO:0045668//negative regulation of osteoblast differentiation;GO:0045669//positive regulation of osteoblast diffe…	--
ENSMUSG00000021948	0.549	0.649	0.804	1.707	1.141	1.275	9	9	14	26	24	23	Prkcd	protein kinase C, delta [Source:MGI Symbol;Acc:MGI:97598]	Human Diseases;Human Diseases;Human Diseases;Organismal Systems;Organismal Systems;Human Diseases;Organismal Systems;Cellular Processes;Organismal Systems;Organismal Systems;Organismal Systems;Organismal Systems;Organismal Systems;Human Diseases;Human Diseases;Organismal Systems;Organismal Systems;Human Diseases	Neurodegenerative disease;Infectious disease: bacterial;Cancer: overview;Immune system;Immune system;Cardiovascular disease;Immune system;Transport and catabolism;Circulatory system;Endocrine system;Sensory system;Nervous system;Immune system;Endocrine and metabolic disease;Endocrine and metabolic disease;Development and regeneration;Endocrine system;Endocrine and metabolic disease	ko05020//Prion disease;ko05131//Shigellosis;ko05208//Chemical carcinogenesis - reactive oxygen species;ko04621//NOD-like receptor signaling pathway;ko04666//Fc gamma R-mediated phagocytosis;ko05415//Diabetic cardiomyopathy;ko04062//Chemokine signaling pathway;ko04140//Autophagy - animal;ko04270//Vascular smooth muscle contraction;ko04915//Estrogen signaling pathway;ko04750//Inflammatory mediator …	K06068;K06068;K06068;K06068;K06068;K06068;K06068;K06068;K06068;K06068;K06068;K06068;K06068;K06068;K06068;K06068;K06068;K06068	GO:0005634//nucleus;GO:0005737//cytoplasm;GO:0005739//mitochondrion;GO:0005783//endoplasmic reticulum;GO:0005829//cytosol;GO:0005886//plasma membrane;GO:0005911//cell-cell junction;GO:0012505//endomembrane system;GO:0016020//membrane;GO:0016363//nuclear matrix;GO:0036019//endolysosome;GO:0048471//perinuclear region of cytoplasm;GO:0099524//postsynaptic cytosol	GO:0000166//nucleotide binding;GO:0004672//protein kinase activity;GO:0004674//protein serine/threonine kinase activity;GO:0004697//protein kinase C activity;GO:0004698//calcium-dependent protein kinase C activity;GO:0004699//calcium-independent protein kinase C activity;GO:0004713//protein tyrosine kinase activity;GO:0004715//non-membrane spanning protein tyrosine kinase activity;GO:0005515//pro…	GO:0006468//protein phosphorylation;GO:0006915//apoptotic process;GO:0006979//response to oxidative stress;GO:0007049//cell cycle;GO:0016064//immunoglobulin mediated immune response;GO:0016310//phosphorylation;GO:0018105//peptidyl-serine phosphorylation;GO:0018107//peptidyl-threonine phosphorylation;GO:0018108//peptidyl-tyrosine phosphorylation;GO:0023021//termination of signal transduction;GO:00…	--
ENSMUSG00000021983	2.126	2.206	1.929	0.711	0.782	0.514	165	176	176	54	60	43	Atp8a2	ATPase, aminophospholipid transporter-like, class I, type 8A, member 2 [Source:MGI Symbol;Acc:MGI:1354710]	-	-	-	-	GO:0000139//Golgi membrane;GO:0005654//nucleoplasm;GO:0005768//endosome;GO:0005794//Golgi apparatus;GO:0005886//plasma membrane;GO:0010008//endosome membrane;GO:0016020//membrane;GO:0016021//integral component of membrane;GO:0042995//cell projection;GO:1990531//phospholipid-translocating ATPase complex	GO:0000166//nucleotide binding;GO:0000287//magnesium ion binding;GO:0005215//transporter activity;GO:0005524//ATP binding;GO:0015247//aminophospholipid flippase activity;GO:0016887//ATP hydrolysis activity;GO:0046872//metal ion binding;GO:0090555//phosphatidylethanolamine flippase activity;GO:0090556//phosphatidylserine floppase activity;GO:0140326//ATPase-coupled intramembrane lipid transporter …	GO:0003011//involuntary skeletal muscle contraction;GO:0006869//lipid transport;GO:0007409//axonogenesis;GO:0007568//aging;GO:0010842//retina layer formation;GO:0010976//positive regulation of neuron projection development;GO:0010996//response to auditory stimulus;GO:0015914//phospholipid transport;GO:0031175//neuron projection development;GO:0040018//positive regulation of multicellular organism…	--
ENSMUSG00000021991	7.741	7.464	6.496	1.68	1.383	1.861	198	167	170	37	39	39	Cacna2d3	calcium channel, voltage-dependent, alpha2/delta subunit 3 [Source:MGI Symbol;Acc:MGI:1338890]	Environmental Information Processing;Human Diseases;Organismal Systems;Organismal Systems;Human Diseases;Organismal Systems;Human Diseases	Signal transduction;Cardiovascular disease;Endocrine system;Circulatory system;Cardiovascular disease;Circulatory system;Cardiovascular disease	ko04010//MAPK signaling pathway;ko05414//Dilated cardiomyopathy;ko04921//Oxytocin signaling pathway;ko04261//Adrenergic signaling in cardiomyocytes;ko05410//Hypertrophic cardiomyopathy;ko04260//Cardiac muscle contraction;ko05412//Arrhythmogenic right ventricular cardiomyopathy	K04860;K04860;K04860;K04860;K04860;K04860;K04860	GO:0005891//voltage-gated calcium channel complex;GO:0016020//membrane	GO:0005244//voltage-gated ion channel activity;GO:0005245//voltage-gated calcium channel activity;GO:0005262//calcium channel activity;GO:0046872//metal ion binding	GO:0006811//ion transport;GO:0006816//calcium ion transport;GO:0034765//regulation of ion transmembrane transport;GO:0070588//calcium ion transmembrane transport	--
ENSMUSG00000022055	3.364	4.474	3.509	1.569	1.047	1.002	78.7	98	84	36.51	27	22	Nefl	neurofilament, light polypeptide [Source:MGI Symbol;Acc:MGI:97313]	Human Diseases;Human Diseases	Neurodegenerative disease;Neurodegenerative disease	ko05022//Pathways of neurodegeneration - multiple diseases;ko05014//Amyotrophic lateral sclerosis	K04572;K04572	GO:0005737//cytoplasm;GO:0005856//cytoskeleton;GO:0005882//intermediate filament;GO:0005883//neurofilament;GO:0030424//axon;GO:0030426//growth cone;GO:0031594//neuromuscular junction;GO:0042995//cell projection;GO:0043005//neuron projection;GO:0043209//myelin sheath;GO:0043229//intracellular organelle;GO:0098685//Schaffer collateral - CA1 synapse;GO:0098981//cholinergic synapse;GO:0099160//postsy…	GO:0005200//structural constituent of cytoskeleton;GO:0005515//protein binding;GO:0008022//protein C-terminus binding;GO:0019904//protein domain specific binding;GO:0030674//protein-macromolecule adaptor activity;GO:0042802//identical protein binding;GO:0043274//phospholipase binding;GO:0044877//protein-containing complex binding;GO:0099184//structural constituent of postsynaptic intermediate fil…	GO:0000226//microtubule cytoskeleton organization;GO:0007409//axonogenesis;GO:0008089//anterograde axonal transport;GO:0008090//retrograde axonal transport;GO:0009636//response to toxic substance;GO:0010033//response to organic substance;GO:0014012//peripheral nervous system axon regeneration;GO:0019896//axonal transport of mitochondrion;GO:0021510//spinal cord development;GO:0021766//hippocampus…	--
ENSMUSG00000022091	30.055	32.734	31.691	8.476	8.014	9.089	608	619	655	170	178	173	Sorbs3	sorbin and SH3 domain containing 3 [Source:MGI Symbol;Acc:MGI:700013]	-	-	-	-	GO:0005634//nucleus;GO:0005737//cytoplasm;GO:0005856//cytoskeleton;GO:0005925//focal adhesion;GO:0030055//cell-substrate junction;GO:0070161//anchoring junction	GO:0005515//protein binding;GO:0017166//vinculin binding	GO:0000122//negative regulation of transcription by RNA polymerase II;GO:0000165//MAPK cascade;GO:0007015//actin filament organization;GO:0007155//cell adhesion;GO:0031589//cell-substrate adhesion;GO:0043410//positive regulation of MAPK cascade;GO:0051496//positive regulation of stress fiber assembly	--
ENSMUSG00000022096	80.657	84.507	85.29	2.41	2.173	2.778	3064	3006	3315	91	91	98	Hr	lysine demethylase and nuclear receptor corepressor [Source:MGI Symbol;Acc:MGI:96223]	-	-	-	-	GO:0000118//histone deacetylase complex;GO:0000785//chromatin;GO:0005634//nucleus;GO:0005654//nucleoplasm;GO:0016604//nuclear body	GO:0003677//DNA binding;GO:0003712//transcription coregulator activity;GO:0003714//transcription corepressor activity;GO:0005515//protein binding;GO:0016491//oxidoreductase activity;GO:0031490//chromatin DNA binding;GO:0032454//histone H3-methyl-lysine-9 demethylase activity;GO:0042809//vitamin D receptor binding;GO:0042826//histone deacetylase binding;GO:0044877//protein-containing complex bindi…	GO:0006351//transcription, DNA-templated;GO:0006357//regulation of transcription by RNA polymerase II;GO:0033169//histone H3-K9 demethylation;GO:0043433//negative regulation of DNA-binding transcription factor activity;GO:0045892//negative regulation of transcription, DNA-templated	--
ENSMUSG00000022129	2.821	2.873	3.399	0.264	0.238	0	43	41	53	4	4	0	Dct	dopachrome tautomerase [Source:MGI Symbol;Acc:MGI:102563]	Metabolism;Organismal Systems;Metabolism	Global and overview maps;Endocrine system;Amino acid metabolism	ko01100//Metabolic pathways;ko04916//Melanogenesis;ko00350//Tyrosine metabolism	K01827;K01827;K01827	GO:0005737//cytoplasm;GO:0005829//cytosol;GO:0005886//plasma membrane;GO:0016020//membrane;GO:0031410//cytoplasmic vesicle;GO:0033162//melanosome membrane;GO:0042470//melanosome;GO:0043231//intracellular membrane-bounded organelle	GO:0004167//dopachrome isomerase activity;GO:0016491//oxidoreductase activity;GO:0016853//isomerase activity;GO:0046872//metal ion binding	GO:0002052//positive regulation of neuroblast proliferation;GO:0006583//melanin biosynthetic process from tyrosine;GO:0007405//neuroblast proliferation;GO:0009637//response to blue light;GO:0021847//ventricular zone neuroblast division;GO:0042438//melanin biosynthetic process;GO:0043473//pigmentation;GO:0048066//developmental pigmentation;GO:0048468//cell development	--
ENSMUSG00000022132	11.988	11.031	8.996	24.964	23.17	26.578	146	119	112	278	307	291	Cldn10	claudin 10 [Source:MGI Symbol;Acc:MGI:1913101]	Human Diseases;Cellular Processes;Human Diseases;Environmental Information Processing;Organismal Systems	Infectious disease: bacterial;Cellular community - eukaryotes;Infectious disease: viral;Signaling molecules and interaction;Immune system	ko05130//Pathogenic Escherichia coli infection;ko04530//Tight junction;ko05160//Hepatitis C;ko04514//Cell adhesion molecules;ko04670//Leukocyte transendothelial migration	K06087;K06087;K06087;K06087;K06087	GO:0005737//cytoplasm;GO:0005783//endoplasmic reticulum;GO:0005886//plasma membrane;GO:0005923//bicellular tight junction;GO:0016020//membrane;GO:0016021//integral component of membrane;GO:0070161//anchoring junction	GO:0005198//structural molecule activity;GO:0005515//protein binding;GO:0042802//identical protein binding	GO:0006811//ion transport;GO:0007155//cell adhesion;GO:0016338//calcium-independent cell-cell adhesion via plasma membrane cell-adhesion molecules;GO:0043269//regulation of ion transport;GO:0070830//bicellular tight junction assembly	--
ENSMUSG00000022146	18.996	18.539	16.972	4.313	4.305	3.476	722	652	660	163	178	124	Osmr	oncostatin M receptor [Source:MGI Symbol;Acc:MGI:1330819]	Environmental Information Processing;Environmental Information Processing;Environmental Information Processing	Signal transduction;Signaling molecules and interaction;Signal transduction	ko04151//PI3K-Akt signaling pathway;ko04060//Cytokine-cytokine receptor interaction;ko04630//JAK-STAT signaling pathway	K05057;K05057;K05057	GO:0005900//oncostatin-M receptor complex;GO:0016020//membrane;GO:0016324//apical plasma membrane	GO:0004896//cytokine receptor activity;GO:0004924//oncostatin-M receptor activity;GO:0005515//protein binding;GO:0019838//growth factor binding	GO:0008284//positive regulation of cell population proliferation;GO:0019221//cytokine-mediated signaling pathway;GO:0034097//response to cytokine;GO:0038165//oncostatin-M-mediated signaling pathway	--
ENSMUSG00000022178	14.417	14.562	15.753	6.672	6.403	7.068	339	320.58	379	156	166	156	Ajuba	ajuba LIM protein [Source:MGI Symbol;Acc:MGI:1341886]	Environmental Information Processing;Environmental Information Processing;Environmental Information Processing	Signal transduction;Signal transduction;Signal transduction	ko04390//Hippo signaling pathway;ko04391//Hippo signaling pathway - fly;ko04392//Hippo signaling pathway - multiple species	K16682;K16682;K16682	GO:0000932//P-body;GO:0005634//nucleus;GO:0005654//nucleoplasm;GO:0005667//transcription regulator complex;GO:0005737//cytoplasm;GO:0005794//Golgi apparatus;GO:0005815//microtubule organizing center;GO:0005829//cytosol;GO:0005856//cytoskeleton;GO:0005886//plasma membrane;GO:0005911//cell-cell junction;GO:0005912//adherens junction;GO:0005925//focal adhesion;GO:0016020//membrane;GO:0030027//lamell…	GO:0003682//chromatin binding;GO:0003714//transcription corepressor activity;GO:0005515//protein binding;GO:0045294//alpha-catenin binding;GO:0046872//metal ion binding;GO:0051015//actin filament binding	GO:0000122//negative regulation of transcription by RNA polymerase II;GO:0001666//response to hypoxia;GO:0006355//regulation of transcription, DNA-templated;GO:0007010//cytoskeleton organization;GO:0007049//cell cycle;GO:0007155//cell adhesion;GO:0007249//I-kappaB kinase/NF-kappaB signaling;GO:0008104//protein localization;GO:0016339//calcium-dependent cell-cell adhesion via plasma membrane cell …	--
ENSMUSG00000022180	9.02	8.803	9.369	1.352	1.059	0.942	255	233	271	38	33	25	Slc7a8	solute carrier family 7 (cationic amino acid transporter, y+ system), member 8 [Source:MGI Symbol;Acc:MGI:1355323]	Organismal Systems	Digestive system	ko04974//Protein digestion and absorption	K13781	GO:0005737//cytoplasm;GO:0005886//plasma membrane;GO:0009925//basal plasma membrane;GO:0016020//membrane;GO:0016021//integral component of membrane;GO:0016323//basolateral plasma membrane;GO:0016324//apical plasma membrane;GO:0031528//microvillus membrane	GO:0005275//amine transmembrane transporter activity;GO:0015101//organic cation transmembrane transporter activity;GO:0015171//amino acid transmembrane transporter activity;GO:0015175//neutral amino acid transmembrane transporter activity;GO:0015179//L-amino acid transmembrane transporter activity;GO:0015180//L-alanine transmembrane transporter activity;GO:0015187//glycine transmembrane transport…	GO:0006865//amino acid transport;GO:0015695//organic cation transport;GO:0015804//neutral amino acid transport;GO:0015807//L-amino acid transport;GO:0015816//glycine transport;GO:0015820//leucine transport;GO:0015827//tryptophan transport;GO:0015829//valine transport;GO:0015837//amine transport;GO:0035524//proline transmembrane transport;GO:0055085//transmembrane transport;GO:0070327//thyroid hor…	--
ENSMUSG00000022237	0.414	0.553	0.777	1.373	1.021	1.453	21	20	25	51	46	46	Ankrd33b	ankyrin repeat domain 33B [Source:MGI Symbol;Acc:MGI:1917904]	-	-	-	-	GO:0005575//cellular_component	GO:0003674//molecular_function;GO:0003677//DNA binding;GO:0005515//protein binding	GO:0008150//biological_process	--
ENSMUSG00000022270	53.463	51.067	53.223	7.305	6.754	7.325	1105	1008	1119	149	159	147	Retreg1	reticulophagy regulator 1 [Source:MGI Symbol;Acc:MGI:1913520]	-	-	-	-	GO:0005730//nucleolus;GO:0005783//endoplasmic reticulum;GO:0005789//endoplasmic reticulum membrane;GO:0005794//Golgi apparatus;GO:0005801//cis-Golgi network;GO:0016020//membrane;GO:0016604//nuclear body;GO:0030176//integral component of endoplasmic reticulum membrane	GO:0005515//protein binding;GO:0043621//protein self-association;GO:0140506//endoplasmic reticulum-autophagosome adaptor activity	GO:0000423//mitophagy;GO:0006914//autophagy;GO:0007029//endoplasmic reticulum organization;GO:0019233//sensory perception of pain;GO:0030574//collagen catabolic process;GO:0043524//negative regulation of neuron apoptotic process;GO:0050872//white fat cell differentiation;GO:0061709//reticulophagy	--
ENSMUSG00000022296	26.824	27.361	32.552	1.494	1.323	1.118	477	440	554	24	24	19	Baalc	brain and acute leukemia, cytoplasmic [Source:MGI Symbol;Acc:MGI:1928704]	-	-	-	-	GO:0005654//nucleoplasm;GO:0005737//cytoplasm;GO:0005829//cytosol;GO:0014069//postsynaptic density;GO:0016020//membrane;GO:0016528//sarcoplasm;GO:0043005//neuron projection;GO:0045121//membrane raft;GO:0045202//synapse	GO:0003674//molecular_function	GO:0008150//biological_process	--
ENSMUSG00000022297	3.778	4.129	3.676	1.175	1.126	0.867	109	112	110	33	36	23	Fzd6	frizzled class receptor 6 [Source:MGI Symbol;Acc:MGI:108474]	Human Diseases;Human Diseases;Human Diseases;Human Diseases;Human Diseases;Human Diseases;Environmental Information Processing;Human Diseases;Environmental Information Processing;Environmental Information Processing;Human Diseases;Human Diseases;Cellular Processes;Organismal Systems;Human Diseases	Cancer: overview;Neurodegenerative disease;Neurodegenerative disease;Infectious disease: viral;Cancer: overview;Cancer: specific types;Signal transduction;Endocrine and metabolic disease;Signal transduction;Signal transduction;Cancer: specific types;Cancer: specific types;Cellular community - eukaryotes;Endocrine system;Cancer: specific types	ko05200//Pathways in cancer;ko05022//Pathways of neurodegeneration - multiple diseases;ko05010//Alzheimer disease;ko05165//Human papillomavirus infection;ko05205//Proteoglycans in cancer;ko05225//Hepatocellular carcinoma;ko04310//Wnt signaling pathway;ko04934//Cushing syndrome;ko04150//mTOR signaling pathway;ko04390//Hippo signaling pathway;ko05226//Gastric cancer;ko05224//Breast cancer;ko04550//…	K02376;K02376;K02376;K02376;K02376;K02376;K02376;K02376;K02376;K02376;K02376;K02376;K02376;K02376;K02376	GO:0005783//endoplasmic reticulum;GO:0005789//endoplasmic reticulum membrane;GO:0005886//plasma membrane;GO:0009986//cell surface;GO:0016020//membrane;GO:0016021//integral component of membrane;GO:0016324//apical plasma membrane;GO:0016327//apicolateral plasma membrane;GO:0030659//cytoplasmic vesicle membrane;GO:0031410//cytoplasmic vesicle;GO:0045177//apical part of cell	GO:0004888//transmembrane signaling receptor activity;GO:0004930//G protein-coupled receptor activity;GO:0005515//protein binding;GO:0017147//Wnt-protein binding;GO:0031625//ubiquitin protein ligase binding;GO:0042813//Wnt-activated receptor activity	GO:0001736//establishment of planar polarity;GO:0001843//neural tube closure;GO:0001942//hair follicle development;GO:0007165//signal transduction;GO:0007166//cell surface receptor signaling pathway;GO:0007186//G protein-coupled receptor signaling pathway;GO:0007399//nervous system development;GO:0016055//Wnt signaling pathway;GO:0030168//platelet activation;GO:0030901//midbrain development;GO:00…	--
ENSMUSG00000022311	6.046	6.092	5.738	0.965	1.066	0.817	494	486	474	74	97	64	Csmd3	CUB and Sushi multiple domains 3 [Source:MGI Symbol;Acc:MGI:2386403]	-	-	-	-	GO:0005615//extracellular space;GO:0005886//plasma membrane;GO:0016020//membrane	GO:0003674//molecular_function	GO:0045959//negative regulation of complement activation, classical pathway;GO:0050773//regulation of dendrite development	--
ENSMUSG00000022371	2.904	2.351	2.64	0.398	0.367	0.528	83	81	91	16	14	16	Col14a1	collagen, type XIV, alpha 1 [Source:MGI Symbol;Acc:MGI:1341272]	Organismal Systems	Digestive system	ko04974//Protein digestion and absorption	K08133	GO:0005576//extracellular region;GO:0005581//collagen trimer;GO:0005614//interstitial matrix;GO:0005615//extracellular space;GO:0062023//collagen-containing extracellular matrix;GO:0110165//cellular anatomical entity	GO:0005515//protein binding;GO:0030020//extracellular matrix structural constituent conferring tensile strength	GO:0003229//ventricular cardiac muscle tissue development;GO:0007155//cell adhesion;GO:0030199//collagen fibril organization;GO:0048873//homeostasis of number of cells within a tissue;GO:0061050//regulation of cell growth involved in cardiac muscle cell development	--
ENSMUSG00000022382	40.697	40.958	41.315	94.182	100.103	95.496	843	793	878	1955	2308	1877	Wnt7b	wingless-type MMTV integration site family, member 7B [Source:MGI Symbol;Acc:MGI:98962]	Human Diseases;Human Diseases;Human Diseases;Human Diseases;Human Diseases;Human Diseases;Environmental Information Processing;Human Diseases;Environmental Information Processing;Environmental Information Processing;Human Diseases;Human Diseases;Cellular Processes;Organismal Systems;Human Diseases	Cancer: overview;Neurodegenerative disease;Neurodegenerative disease;Infectious disease: viral;Cancer: overview;Cancer: specific types;Signal transduction;Endocrine and metabolic disease;Signal transduction;Signal transduction;Cancer: specific types;Cancer: specific types;Cellular community - eukaryotes;Endocrine system;Cancer: specific types	ko05200//Pathways in cancer;ko05022//Pathways of neurodegeneration - multiple diseases;ko05010//Alzheimer disease;ko05165//Human papillomavirus infection;ko05205//Proteoglycans in cancer;ko05225//Hepatocellular carcinoma;ko04310//Wnt signaling pathway;ko04934//Cushing syndrome;ko04150//mTOR signaling pathway;ko04390//Hippo signaling pathway;ko05226//Gastric cancer;ko05224//Breast cancer;ko04550//…	K00572;K00572;K00572;K00572;K00572;K00572;K00572;K00572;K00572;K00572;K00572;K00572;K00572;K00572;K00572	GO:0005576//extracellular region;GO:0005615//extracellular space;GO:0005737//cytoplasm;GO:0005788//endoplasmic reticulum lumen;GO:0005886//plasma membrane;GO:0009986//cell surface	GO:0005102//signaling receptor binding;GO:0005109//frizzled binding;GO:0005125//cytokine activity;GO:0048018//receptor ligand activity;GO:1902379//chemoattractant activity involved in axon guidance	GO:0001525//angiogenesis;GO:0001649//osteoblast differentiation;GO:0001701//in utero embryonic development;GO:0001944//vasculature development;GO:0003338//metanephros morphogenesis;GO:0007275//multicellular organism development;GO:0008283//cell population proliferation;GO:0008284//positive regulation of cell population proliferation;GO:0009887//animal organ morphogenesis;GO:0009888//tissue develo…	--
ENSMUSG00000022456	160.593	157.572	162.121	48.883	47.283	52.655	4160	3654	4119	1346	1394	1265	Septin3	septin 3 [Source:MGI Symbol;Acc:MGI:1345148]	Human Diseases;Human Diseases	Infectious disease: bacterial;Infectious disease: bacterial	ko05131//Shigellosis;ko05100//Bacterial invasion of epithelial cells	K16938;K16938	GO:0005737//cytoplasm;GO:0005829//cytosol;GO:0005856//cytoskeleton;GO:0005940//septin ring;GO:0015630//microtubule cytoskeleton;GO:0031105//septin complex;GO:0032153//cell division site;GO:0042734//presynaptic membrane;GO:0043005//neuron projection;GO:0045202//synapse;GO:0098793//presynapse;GO:0099569//presynaptic cytoskeleton	GO:0000166//nucleotide binding;GO:0003924//GTPase activity;GO:0005515//protein binding;GO:0005525//GTP binding;GO:0042802//identical protein binding;GO:0060090//molecular adaptor activity	GO:0007049//cell cycle;GO:0051301//cell division;GO:0061640//cytoskeleton-dependent cytokinesis	--
ENSMUSG00000022483	0.505	0.095	0.203	0.911	0.972	1.27	17	3	7	32	37	42	Col2a1	collagen, type II, alpha 1 [Source:MGI Symbol;Acc:MGI:88452]	Environmental Information Processing;Human Diseases;Cellular Processes;Organismal Systems;Environmental Information Processing	Signal transduction;Infectious disease: viral;Cellular community - eukaryotes;Digestive system;Signaling molecules and interaction	ko04151//PI3K-Akt signaling pathway;ko05165//Human papillomavirus infection;ko04510//Focal adhesion;ko04974//Protein digestion and absorption;ko04512//ECM-receptor interaction	K19719;K19719;K19719;K19719;K19719	GO:0005576//extracellular region;GO:0005581//collagen trimer;GO:0005585//collagen type II trimer;GO:0005592//collagen type XI trimer;GO:0005604//basement membrane;GO:0005615//extracellular space;GO:0005737//cytoplasm;GO:0031012//extracellular matrix;GO:0062023//collagen-containing extracellular matrix;GO:0110165//cellular anatomical entity	GO:0005201//extracellular matrix structural constituent;GO:0005515//protein binding;GO:0042289//MHC class II protein binding;GO:0042802//identical protein binding;GO:0043394//proteoglycan binding;GO:0046872//metal ion binding;GO:0048407//platelet-derived growth factor binding	GO:0001501//skeletal system development;GO:0001502//cartilage condensation;GO:0001503//ossification;GO:0001894//tissue homeostasis;GO:0001958//endochondral ossification;GO:0002062//chondrocyte differentiation;GO:0003007//heart morphogenesis;GO:0006029//proteoglycan metabolic process;GO:0007417//central nervous system development;GO:0007601//visual perception;GO:0007605//sensory perception of soun…	--
ENSMUSG00000022494	84.437	88.767	87.112	20.973	21.257	20.227	2525	2479	2655	615	686	566	Shisa9	shisa family member 9 [Source:MGI Symbol;Acc:MGI:1919805]	-	-	-	-	GO:0005886//plasma membrane;GO:0008328//ionotropic glutamate receptor complex;GO:0014069//postsynaptic density;GO:0016020//membrane;GO:0032281//AMPA glutamate receptor complex;GO:0032591//dendritic spine membrane;GO:0042995//cell projection;GO:0045202//synapse;GO:0045211//postsynaptic membrane;GO:0098839//postsynaptic density membrane;GO:0098978//glutamatergic synapse	GO:0030165//PDZ domain binding	GO:0048172//regulation of short-term neuronal synaptic plasticity;GO:0098962//regulation of postsynaptic neurotransmitter receptor activity;GO:2000311//regulation of AMPA receptor activity	--
ENSMUSG00000022523	36.946	33.62	36.881	9.032	10.062	9.212	592	553	576	196	218	189	Fgf12	fibroblast growth factor 12 [Source:MGI Symbol;Acc:MGI:109183]	-	-	-	-	GO:0005634//nucleus;GO:0005737//cytoplasm;GO:0045202//synapse	GO:0005515//protein binding;GO:0008083//growth factor activity;GO:0008201//heparin binding;GO:0017080//sodium channel regulator activity;GO:0044325//transmembrane transporter binding	GO:0003254//regulation of membrane depolarization;GO:0007165//signal transduction;GO:0007254//JNK cascade;GO:0007268//chemical synaptic transmission;GO:0008344//adult locomotory behavior;GO:0008543//fibroblast growth factor receptor signaling pathway;GO:0010765//positive regulation of sodium ion transport;GO:0050905//neuromuscular process;GO:0098908//regulation of neuronal action potential;GO:190…	--
ENSMUSG00000022528	4.724	6.202	5.771	56.91	62.393	61.226	48	59	60	575	699	584	Hes1	hes family bHLH transcription factor 1 [Source:MGI Symbol;Acc:MGI:104853]	Human Diseases;Human Diseases;Human Diseases;Human Diseases;Environmental Information Processing;Genetic Information Processing;Human Diseases	Cancer: overview;Infectious disease: viral;Infectious disease: viral;Cancer: specific types;Signal transduction;Replication and repair;Endocrine and metabolic disease	ko05200//Pathways in cancer;ko05165//Human papillomavirus infection;ko05169//Epstein-Barr virus infection;ko05224//Breast cancer;ko04330//Notch signaling pathway;ko03460//Fanconi anemia pathway;ko04950//Maturity onset diabetes of the young	K06054;K06054;K06054;K06054;K06054;K06054;K06054	GO:0000785//chromatin;GO:0005634//nucleus;GO:0005654//nucleoplasm;GO:0005737//cytoplasm;GO:0016363//nuclear matrix;GO:0032991//protein-containing complex	GO:0000978//RNA polymerase II cis-regulatory region sequence-specific DNA binding;GO:0000981//DNA-binding transcription factor activity, RNA polymerase II-specific;GO:0001217//DNA-binding transcription repressor activity;GO:0001222//transcription corepressor binding;GO:0001227//DNA-binding transcription repressor activity, RNA polymerase II-specific;GO:0003677//DNA binding;GO:0003682//chromatin b…	GO:0000122//negative regulation of transcription by RNA polymerase II;GO:0001701//in utero embryonic development;GO:0001709//cell fate determination;GO:0001889//liver development;GO:0002085//inhibition of neuroepithelial cell differentiation;GO:0003143//embryonic heart tube morphogenesis;GO:0003151//outflow tract morphogenesis;GO:0003266//regulation of secondary heart field cardioblast proliferat…	bHLH
ENSMUSG00000022565	18.993	17.004	18.395	6.09	5.524	6.567	1875	1617	1906	610	629	595	Plec	plectin [Source:MGI Symbol;Acc:MGI:1277961]	-	-	-	-	GO:0005737//cytoplasm;GO:0005741//mitochondrial outer membrane;GO:0005829//cytosol;GO:0005856//cytoskeleton;GO:0005882//intermediate filament;GO:0005903//brush border;GO:0005925//focal adhesion;GO:0009925//basal plasma membrane;GO:0016020//membrane;GO:0016324//apical plasma membrane;GO:0016528//sarcoplasm;GO:0030016//myofibril;GO:0030018//Z disc;GO:0030056//hemidesmosome;GO:0030424//axon;GO:00304…	GO:0002162//dystroglycan binding;GO:0003779//actin binding;GO:0005198//structural molecule activity;GO:0005200//structural constituent of cytoskeleton;GO:0005515//protein binding;GO:0008092//cytoskeletal protein binding;GO:0008307//structural constituent of muscle;GO:0030506//ankyrin binding;GO:0043621//protein self-association;GO:0047485//protein N-terminus binding;GO:0051015//actin filament bin…	GO:0000902//cell morphogenesis;GO:0002522//leukocyte migration involved in immune response;GO:0003334//keratinocyte development;GO:0006469//negative regulation of protein kinase activity;GO:0006997//nucleus organization;GO:0007005//mitochondrion organization;GO:0007015//actin filament organization;GO:0007519//skeletal muscle tissue development;GO:0007584//response to nutrient;GO:0008104//protein …	--
ENSMUSG00000022577	12.864	11.206	10.608	3.83	3.682	2.759	83	78	81	27	33	20	Ly6h	lymphocyte antigen 6 complex, locus H [Source:MGI Symbol;Acc:MGI:1346030]	-	-	-	-	GO:0005886//plasma membrane;GO:0016020//membrane;GO:0045202//synapse	GO:0030550//acetylcholine receptor inhibitor activity;GO:0033130//acetylcholine receptor binding	GO:0095500//acetylcholine receptor signaling pathway;GO:2000272//negative regulation of signaling receptor activity	--
ENSMUSG00000022610	2.237	2.39	1.562	8.599	10.654	8.768	28	28	20	107	147	103	Mapk12	mitogen-activated protein kinase 12 [Source:MGI Symbol;Acc:MGI:1353438]	Human Diseases;Human Diseases;Human Diseases;Human Diseases;Human Diseases;Organismal Systems;Human Diseases;Environmental Information Processing;Human Diseases;Human Diseases;Human Diseases;Human Diseases;Human Diseases;Human Diseases;Organismal Systems;Human Diseases;Human Diseases;Environmental Information Processing;Human Diseases;Organismal Systems;Human Diseases;Human Diseases;Organismal Sy…	Neurodegenerative disease;Neurodegenerative disease;Infectious disease: viral;Infectious disease: viral;Infectious disease: bacterial;Immune system;Infectious disease: bacterial;Signal transduction;Neurodegenerative disease;Infectious disease: bacterial;Infectious disease: bacterial;Infectious disease: bacterial;Infectious disease: viral;Infectious disease: viral;Environmental adaptation;Cancer: …	ko05022//Pathways of neurodegeneration - multiple diseases;ko05014//Amyotrophic lateral sclerosis;ko05171//Coronavirus disease - COVID-19;ko05169//Epstein-Barr virus infection;ko05130//Pathogenic Escherichia coli infection;ko04613//Neutrophil extracellular trap formation;ko05152//Tuberculosis;ko04010//MAPK signaling pathway;ko05020//Prion disease;ko05135//Yersinia infection;ko05132//Salmonella in…	K04441;K04441;K04441;K04441;K04441;K04441;K04441;K04441;K04441;K04441;K04441;K04441;K04441;K04441;K04441;K04441;K04441;K04441;K04441;K04441;K04441;K04441;K04441;K04441;K04441;K04441;K04441;K04441;K04441;K04441;K04441;K04441;K04441;K04441;K04441;K04441;K04441;K04441;K04441;K04441;K04441;K04441;K04441;K04441;K04441;K04441;K04441;K04441;K04441;K04441;K04441;K04441;K04441;K04441;K04441;K04441;K04441;…	GO:0005634//nucleus;GO:0005654//nucleoplasm;GO:0005737//cytoplasm;GO:0005739//mitochondrion	GO:0000166//nucleotide binding;GO:0000287//magnesium ion binding;GO:0004672//protein kinase activity;GO:0004674//protein serine/threonine kinase activity;GO:0004707//MAP kinase activity;GO:0005524//ATP binding;GO:0016301//kinase activity;GO:0016740//transferase activity;GO:0046872//metal ion binding;GO:0106310//protein serine kinase activity	GO:0000165//MAPK cascade;GO:0006468//protein phosphorylation;GO:0007049//cell cycle;GO:0016310//phosphorylation;GO:0018105//peptidyl-serine phosphorylation;GO:0035556//intracellular signal transduction;GO:0045445//myoblast differentiation;GO:0045786//negative regulation of cell cycle	--
ENSMUSG00000022619	37.326	37.618	35.338	9.097	10.232	8.529	1436	1355	1391	348	434	308	Mapk8ip2	mitogen-activated protein kinase 8 interacting protein 2 [Source:MGI Symbol;Acc:MGI:1926555]	Environmental Information Processing	Signal transduction	ko04010//MAPK signaling pathway	K04435	GO:0005737//cytoplasm;GO:0014069//postsynaptic density;GO:0032991//protein-containing complex;GO:0043025//neuronal cell body	GO:0005078//MAP-kinase scaffold activity;GO:0005515//protein binding;GO:0019894//kinesin binding;GO:0019901//protein kinase binding;GO:0030295//protein kinase activator activity;GO:0044877//protein-containing complex binding	GO:0000165//MAPK cascade;GO:0001662//behavioral fear response;GO:0007254//JNK cascade;GO:0007617//mating behavior;GO:0010469//regulation of signaling receptor activity;GO:0032874//positive regulation of stress-activated MAPK cascade;GO:0035176//social behavior;GO:0046328//regulation of JNK cascade;GO:0046958//nonassociative learning;GO:0048813//dendrite morphogenesis;GO:0051966//regulation of syn…	--
ENSMUSG00000022679	26.745	24.678	21.072	7.507	7.95	6.741	466.23	396.2	416.21	129.86	164.23	119.14	Mpv17l	Mpv17 transgene, kidney disease mutant-like [Source:MGI Symbol;Acc:MGI:2135951]	Cellular Processes	Transport and catabolism	ko04146//Peroxisome	K13349	GO:0005737//cytoplasm;GO:0005739//mitochondrion;GO:0005777//peroxisome;GO:0005778//peroxisomal membrane;GO:0016020//membrane;GO:0016021//integral component of membrane;GO:0043231//intracellular membrane-bounded organelle	GO:0005515//protein binding	GO:0010730//negative regulation of hydrogen peroxide biosynthetic process;GO:0072593//reactive oxygen species metabolic process;GO:1901029//negative regulation of mitochondrial outer membrane permeabilization involved in apoptotic signaling pathway	--
ENSMUSG00000022747	23.375	23.389	20.919	11.655	9.521	10.171	411.22	354.03	364.82	149.24	146.59	156.64	St3gal6	ST3 beta-galactoside alpha-2,3-sialyltransferase 6 [Source:MGI Symbol;Acc:MGI:1888707]	Metabolism;Metabolism	Global and overview maps;Glycan biosynthesis and metabolism	ko01100//Metabolic pathways;ko00601//Glycosphingolipid biosynthesis - lacto and neolacto series	K03792;K03792	GO:0000139//Golgi membrane;GO:0005575//cellular_component;GO:0005794//Golgi apparatus;GO:0016020//membrane	GO:0008373//sialyltransferase activity;GO:0016740//transferase activity;GO:0016757//glycosyltransferase activity;GO:0052798//beta-galactoside alpha-2,3-sialyltransferase activity	GO:0006486//protein glycosylation;GO:0006664//glycolipid metabolic process;GO:0009311//oligosaccharide metabolic process;GO:0036211//protein modification process;GO:0071354//cellular response to interleukin-6;GO:0097503//sialylation	--
ENSMUSG00000022758	6.218	5.323	4.668	2.201	2.824	1.98	94	79	78	36	53	32	P2rx6	purinergic receptor P2X, ligand-gated ion channel, 6 [Source:MGI Symbol;Acc:MGI:1337113]	Environmental Information Processing;Environmental Information Processing	Signaling molecules and interaction;Signal transduction	ko04080//Neuroactive ligand-receptor interaction;ko04020//Calcium signaling pathway	K05221;K05221	GO:0005637//nuclear inner membrane;GO:0005737//cytoplasm;GO:0005886//plasma membrane;GO:0005887//integral component of plasma membrane;GO:0014069//postsynaptic density;GO:0016020//membrane;GO:0030054//cell junction;GO:0043025//neuronal cell body;GO:0043197//dendritic spine;GO:0043235//receptor complex;GO:0098688//parallel fiber to Purkinje cell synapse;GO:0098794//postsynapse;GO:0098978//glutamat…	GO:0000166//nucleotide binding;GO:0001614//purinergic nucleotide receptor activity;GO:0004931//extracellularly ATP-gated cation channel activity;GO:0005216//ion channel activity;GO:0005261//cation channel activity;GO:0005524//ATP binding;GO:0044877//protein-containing complex binding	GO:0003008//system process;GO:0006811//ion transport;GO:0007166//cell surface receptor signaling pathway;GO:0007267//cell-cell signaling;GO:0033198//response to ATP;GO:0035590//purinergic nucleotide receptor signaling pathway;GO:0060079//excitatory postsynaptic potential;GO:0065008//regulation of biological quality;GO:0098655//cation transmembrane transport	--
ENSMUSG00000022788	24.826	24.207	22.749	10.175	9.699	10.72	1291	1207	1219	552	577	494	Fgd4	FYVE, RhoGEF and PH domain containing 4 [Source:MGI Symbol;Acc:MGI:2183747]	-	-	-	-	GO:0005737//cytoplasm;GO:0005856//cytoskeleton;GO:0030027//lamellipodium;GO:0030175//filopodium;GO:0042995//cell projection	GO:0003779//actin binding;GO:0005085//guanyl-nucleotide exchange factor activity;GO:0046872//metal ion binding;GO:0051015//actin filament binding	GO:0007010//cytoskeleton organization;GO:0008360//regulation of cell shape;GO:0030032//lamellipodium assembly;GO:0030035//microspike assembly;GO:0043507//positive regulation of JUN kinase activity;GO:0046330//positive regulation of JNK cascade;GO:0046847//filopodium assembly	--
ENSMUSG00000022829	2.296	1.521	1.644	0.448	0.429	0.812	67	40	48	13	14	22	Stxbp5l	syntaxin binding protein 5-like [Source:MGI Symbol;Acc:MGI:2443815]	-	-	-	-	GO:0005737//cytoplasm;GO:0005886//plasma membrane;GO:0016020//membrane;GO:0031201//SNARE complex;GO:0031594//neuromuscular junction;GO:0098992//neuronal dense core vesicle	GO:0005096//GTPase activator activity;GO:0005515//protein binding;GO:0019905//syntaxin binding;GO:0045159//myosin II binding	GO:0006887//exocytosis;GO:0015031//protein transport;GO:0017157//regulation of exocytosis;GO:0042593//glucose homeostasis;GO:0046676//negative regulation of insulin secretion;GO:0050708//regulation of protein secretion;GO:2000300//regulation of synaptic vesicle exocytosis	--
ENSMUSG00000022836	0.815	1.118	0.307	2.711	2.646	2.783	27	31	17	146	142	131	Mylk	myosin, light polypeptide kinase [Source:MGI Symbol;Acc:MGI:894806]	Environmental Information Processing;Cellular Processes;Cellular Processes;Environmental Information Processing;Organismal Systems;Organismal Systems;Environmental Information Processing;Organismal Systems;Organismal Systems	Signal transduction;Cell motility;Cellular community - eukaryotes;Signal transduction;Endocrine system;Circulatory system;Signal transduction;Immune system;Digestive system	ko04020//Calcium signaling pathway;ko04810//Regulation of actin cytoskeleton;ko04510//Focal adhesion;ko04022//cGMP-PKG signaling pathway;ko04921//Oxytocin signaling pathway;ko04270//Vascular smooth muscle contraction;ko04371//Apelin signaling pathway;ko04611//Platelet activation;ko04971//Gastric acid secretion	K00907;K00907;K00907;K00907;K00907;K00907;K00907;K00907;K00907	GO:0001725//stress fiber;GO:0005737//cytoplasm;GO:0005856//cytoskeleton;GO:0005886//plasma membrane;GO:0005911//cell-cell junction;GO:0015629//actin cytoskeleton;GO:0030027//lamellipodium;GO:0032154//cleavage furrow;GO:0042995//cell projection	GO:0000166//nucleotide binding;GO:0003779//actin binding;GO:0004672//protein kinase activity;GO:0004674//protein serine/threonine kinase activity;GO:0004687//myosin light chain kinase activity;GO:0005515//protein binding;GO:0005516//calmodulin binding;GO:0005524//ATP binding;GO:0016301//kinase activity;GO:0016740//transferase activity;GO:0019899//enzyme binding;GO:0046872//metal ion binding	GO:0006468//protein phosphorylation;GO:0006939//smooth muscle contraction;GO:0014820//tonic smooth muscle contraction;GO:0016310//phosphorylation;GO:0030335//positive regulation of cell migration;GO:0032060//bleb assembly;GO:0035865//cellular response to potassium ion;GO:0051928//positive regulation of calcium ion transport;GO:0060414//aorta smooth muscle tissue morphogenesis;GO:0071277//cellular…	--
ENSMUSG00000022840	9.586	9.182	9.51	2.198	2.58	2.657	465	417	472	106	138	121	Adcy5	adenylate cyclase 5 [Source:MGI Symbol;Acc:MGI:99673]	Metabolism;Human Diseases;Human Diseases;Environmental Information Processing;Human Diseases;Human Diseases;Organismal Systems;Environmental Information Processing;Environmental Information Processing;Human Diseases;Human Diseases;Human Diseases;Organismal Systems;Environmental Information Processing;Human Diseases;Organismal Systems;Organismal Systems;Organismal Systems;Organismal Systems;Organi…	Global and overview maps;Cancer: overview;Neurodegenerative disease;Signal transduction;Infectious disease: viral;Infectious disease: viral;Environmental adaptation;Signal transduction;Signal transduction;Cancer: overview;Cardiovascular disease;Substance dependence;Immune system;Signal transduction;Endocrine and metabolic disease;Endocrine system;Nervous system;Circulatory system;Circulatory syst…	ko01100//Metabolic pathways;ko05200//Pathways in cancer;ko05012//Parkinson disease;ko04072//Phospholipase D signaling pathway;ko05163//Human cytomegalovirus infection;ko05166//Human T-cell leukemia virus 1 infection;ko04714//Thermogenesis;ko04015//Rap1 signaling pathway;ko04024//cAMP signaling pathway;ko05207//Chemical carcinogenesis - receptor activation;ko05414//Dilated cardiomyopathy;ko05034//…	K08045;K08045;K08045;K08045;K08045;K08045;K08045;K08045;K08045;K08045;K08045;K08045;K08045;K08045;K08045;K08045;K08045;K08045;K08045;K08045;K08045;K08045;K08045;K08045;K08045;K08045;K08045;K08045;K08045;K08045;K08045;K08045;K08045;K08045;K08045;K08045;K08045;K08045;K08045;K08045;K08045;K08045;K08045;K08045;K08045;K08045;K08045;K08045;K08045;K08045;K08045;K08045;K08045;K08045;K08045	GO:0005768//endosome;GO:0005886//plasma membrane;GO:0005929//cilium;GO:0016020//membrane;GO:0042383//sarcolemma;GO:0042995//cell projection;GO:0045111//intermediate filament cytoskeleton;GO:0045121//membrane raft	GO:0000166//nucleotide binding;GO:0004016//adenylate cyclase activity;GO:0005515//protein binding;GO:0005524//ATP binding;GO:0008179//adenylate cyclase binding;GO:0008294//calcium- and calmodulin-responsive adenylate cyclase activity;GO:0016829//lyase activity;GO:0016849//phosphorus-oxygen lyase activity;GO:0046872//metal ion binding;GO:0097110//scaffold protein binding	GO:0001973//G protein-coupled adenosine receptor signaling pathway;GO:0006171//cAMP biosynthetic process;GO:0007189//adenylate cyclase-activating G protein-coupled receptor signaling pathway;GO:0007191//adenylate cyclase-activating dopamine receptor signaling pathway;GO:0007193//adenylate cyclase-inhibiting G protein-coupled receptor signaling pathway;GO:0007195//adenylate cyclase-inhibiting dopa…	--
ENSMUSG00000022861	0.284	0.23	0.318	3.356	4.432	3.841	7	5	8	81	112	86	Dgkg	diacylglycerol kinase, gamma [Source:MGI Symbol;Acc:MGI:105060]	Metabolism;Environmental Information Processing;Human Diseases;Metabolism;Environmental Information Processing;Organismal Systems;Metabolism	Global and overview maps;Signal transduction;Cancer: overview;Lipid metabolism;Signal transduction;Development and regeneration;Lipid metabolism	ko01100//Metabolic pathways;ko04072//Phospholipase D signaling pathway;ko05231//Choline metabolism in cancer;ko00564//Glycerophospholipid metabolism;ko04070//Phosphatidylinositol signaling system;ko04361//Axon regeneration;ko00561//Glycerolipid metabolism	K00901;K00901;K00901;K00901;K00901;K00901;K00901	GO:0005737//cytoplasm;GO:0005829//cytosol;GO:0005856//cytoskeleton;GO:0005886//plasma membrane;GO:0016020//membrane	GO:0000166//nucleotide binding;GO:0004143//diacylglycerol kinase activity;GO:0004674//protein serine/threonine kinase activity;GO:0005509//calcium ion binding;GO:0005524//ATP binding;GO:0008289//lipid binding;GO:0016301//kinase activity;GO:0016740//transferase activity;GO:0046872//metal ion binding	GO:0006468//protein phosphorylation;GO:0006629//lipid metabolic process;GO:0006654//phosphatidic acid biosynthetic process;GO:0007165//signal transduction;GO:0007205//protein kinase C-activating G protein-coupled receptor signaling pathway;GO:0016310//phosphorylation;GO:0035556//intracellular signal transduction;GO:0046339//diacylglycerol metabolic process;GO:0046486//glycerolipid metabolic proce…	--
ENSMUSG00000022883	17.751	17.456	18.039	41.662	41.465	41.416	864	788	898	2054	2214	1907	Robo1	roundabout guidance receptor 1 [Source:MGI Symbol;Acc:MGI:1274781]	Organismal Systems	Development and regeneration	ko04360//Axon guidance	K06753	GO:0005737//cytoplasm;GO:0005886//plasma membrane;GO:0009986//cell surface	GO:0005515//protein binding;GO:0008046//axon guidance receptor activity;GO:0030275//LRR domain binding;GO:0042802//identical protein binding	GO:0002042//cell migration involved in sprouting angiogenesis;GO:0006919//activation of cysteine-type endopeptidase activity involved in apoptotic process;GO:0007156//homophilic cell adhesion via plasma membrane adhesion molecules;GO:0007411//axon guidance;GO:0016199//axon midline choice point recognition;GO:0021836//chemorepulsion involved in postnatal olfactory bulb interneuron migration;GO:003…	--
ENSMUSG00000022949	0	0	0.075	0.232	0.279	0.164	0	0	2	6	8	4	Clic6	chloride intracellular channel 6 [Source:MGI Symbol;Acc:MGI:2146607]	-	-	-	-	GO:0005737//cytoplasm;GO:0005886//plasma membrane;GO:0016020//membrane;GO:0034707//chloride channel complex	GO:0005244//voltage-gated ion channel activity;GO:0005254//chloride channel activity;GO:0008022//protein C-terminus binding;GO:0031749//D2 dopamine receptor binding;GO:0031750//D3 dopamine receptor binding;GO:0031751//D4 dopamine receptor binding;GO:0042802//identical protein binding	GO:0006811//ion transport;GO:0006821//chloride transport;GO:0034220//ion transmembrane transport;GO:0034765//regulation of ion transmembrane transport;GO:1902476//chloride transmembrane transport	--
ENSMUSG00000022952	0.107	0.078	0.166	0.58	0.596	0.443	4	1	3	19	21	14	Runx1	runt related transcription factor 1 [Source:MGI Symbol;Acc:MGI:99852]	Human Diseases;Human Diseases;Cellular Processes;Organismal Systems;Human Diseases;Human Diseases	Cancer: overview;Cancer: overview;Cellular community - eukaryotes;Immune system;Cancer: specific types;Cancer: specific types	ko05200//Pathways in cancer;ko05202//Transcriptional misregulation in cancer;ko04530//Tight junction;ko04659//Th17 cell differentiation;ko05220//Chronic myeloid leukemia;ko05221//Acute myeloid leukemia	K08367;K08367;K08367;K08367;K08367;K08367	GO:0005634//nucleus;GO:0005654//nucleoplasm;GO:0043231//intracellular membrane-bounded organelle	GO:0000976//transcription cis-regulatory region binding;GO:0000977//RNA polymerase II transcription regulatory region sequence-specific DNA binding;GO:0000978//RNA polymerase II cis-regulatory region sequence-specific DNA binding;GO:0001228//DNA-binding transcription activator activity, RNA polymerase II-specific;GO:0003677//DNA binding;GO:0003700//DNA-binding transcription factor activity;GO:000…	GO:0002573//myeloid leukocyte differentiation;GO:0006355//regulation of transcription, DNA-templated;GO:0009966//regulation of signal transduction;GO:0030097//hemopoiesis;GO:0030854//positive regulation of granulocyte differentiation;GO:0032743//positive regulation of interleukin-2 production;GO:0045893//positive regulation of transcription, DNA-templated;GO:0045944//positive regulation of transc…	Runt
ENSMUSG00000023000	0	0	0.245	1.439	1.743	1.778	0	0	2	42	41.66	49	Dhh	desert hedgehog [Source:MGI Symbol;Acc:MGI:94891]	Environmental Information Processing	Signal transduction	ko04340//Hedgehog signaling pathway	K11990	GO:0000139//Golgi membrane;GO:0005576//extracellular region;GO:0005615//extracellular space;GO:0005783//endoplasmic reticulum;GO:0005789//endoplasmic reticulum membrane;GO:0005794//Golgi apparatus;GO:0005886//plasma membrane;GO:0016020//membrane	GO:0005113//patched binding;GO:0005509//calcium ion binding;GO:0005515//protein binding;GO:0008233//peptidase activity;GO:0008270//zinc ion binding;GO:0016740//transferase activity;GO:0016787//hydrolase activity;GO:0046872//metal ion binding	GO:0001649//osteoblast differentiation;GO:0001708//cell fate specification;GO:0006508//proteolysis;GO:0007224//smoothened signaling pathway;GO:0007267//cell-cell signaling;GO:0007275//multicellular organism development;GO:0007286//spermatid development;GO:0010468//regulation of gene expression;GO:0016539//intein-mediated protein splicing;GO:0016540//protein autoprocessing;GO:0030238//male sex det…	--
ENSMUSG00000023067	51.841	51.975	48.252	276.704	286.234	275.811	647.01	612	624	3545.3	4074.01	3323.01	Cdkn1a	cyclin-dependent kinase inhibitor 1A (P21) [Source:MGI Symbol;Acc:MGI:104556]	Human Diseases;Environmental Information Processing;Human Diseases;Human Diseases;Human Diseases;Human Diseases;Human Diseases;Human Diseases;Human Diseases;Human Diseases;Environmental Information Processing;Cellular Processes;Human Diseases;Human Diseases;Human Diseases;Human Diseases;Human Diseases;Organismal Systems;Human Diseases;Human Diseases;Environmental Information Processing;Cellular P…	Cancer: overview;Signal transduction;Infectious disease: viral;Infectious disease: viral;Cancer: overview;Infectious disease: viral;Infectious disease: viral;Infectious disease: viral;Cancer: overview;Cancer: overview;Signal transduction;Cell growth and death;Cancer: specific types;Infectious disease: viral;Infectious disease: viral;Endocrine and metabolic disease;Cancer: overview;Endocrine syste…	ko05200//Pathways in cancer;ko04151//PI3K-Akt signaling pathway;ko05165//Human papillomavirus infection;ko05169//Epstein-Barr virus infection;ko05202//Transcriptional misregulation in cancer;ko05163//Human cytomegalovirus infection;ko05166//Human T-cell leukemia virus 1 infection;ko05167//Kaposi sarcoma-associated herpesvirus infection;ko05203//Viral carcinogenesis;ko05205//Proteoglycans in cance…	K06625;K06625;K06625;K06625;K06625;K06625;K06625;K06625;K06625;K06625;K06625;K06625;K06625;K06625;K06625;K06625;K06625;K06625;K06625;K06625;K06625;K06625;K06625;K06625;K06625;K06625;K06625;K06625;K06625;K06625;K06625;K06625;K06625;K06625;K06625;K06625;K06625;K06625;K06625;K06625;K06625	GO:0000307//cyclin-dependent protein kinase holoenzyme complex;GO:0005634//nucleus;GO:0005654//nucleoplasm;GO:0005730//nucleolus;GO:0005737//cytoplasm;GO:0005829//cytosol;GO:0016604//nuclear body;GO:0032991//protein-containing complex;GO:0048471//perinuclear region of cytoplasm;GO:0070557//PCNA-p21 complex	GO:0004860//protein kinase inhibitor activity;GO:0004861//cyclin-dependent protein serine/threonine kinase inhibitor activity;GO:0005515//protein binding;GO:0016301//kinase activity;GO:0019901//protein kinase binding;GO:0019912//cyclin-dependent protein kinase activating kinase activity;GO:0030332//cyclin binding;GO:0031625//ubiquitin protein ligase binding;GO:0044877//protein-containing complex …	GO:0000079//regulation of cyclin-dependent protein serine/threonine kinase activity;GO:0001933//negative regulation of protein phosphorylation;GO:0001934//positive regulation of protein phosphorylation;GO:0006606//protein import into nucleus;GO:0006974//cellular response to DNA damage stimulus;GO:0006977//DNA damage response, signal transduction by p53 class mediator resulting in cell cycle arres…	--
ENSMUSG00000023192	0.215	0.197	0.24	0	0	0	7	6	8	0	0	0	Grm2	glutamate receptor, metabotropic 2 [Source:MGI Symbol;Acc:MGI:1351339]	Environmental Information Processing;Environmental Information Processing;Organismal Systems;Human Diseases	Signaling molecules and interaction;Signal transduction;Nervous system;Substance dependence	ko04080//Neuroactive ligand-receptor interaction;ko04072//Phospholipase D signaling pathway;ko04724//Glutamatergic synapse;ko05030//Cocaine addiction	K04605;K04605;K04605;K04605	GO:0005886//plasma membrane;GO:0016020//membrane;GO:0016021//integral component of membrane;GO:0030424//axon;GO:0030425//dendrite;GO:0042734//presynaptic membrane;GO:0042995//cell projection;GO:0043005//neuron projection;GO:0045202//synapse;GO:0097449//astrocyte projection;GO:0098978//glutamatergic synapse	GO:0001640//adenylate cyclase inhibiting G protein-coupled glutamate receptor activity;GO:0001641//group II metabotropic glutamate receptor activity;GO:0004930//G protein-coupled receptor activity;GO:0005246//calcium channel regulator activity;GO:0097110//scaffold protein binding	GO:0007154//cell communication;GO:0007165//signal transduction;GO:0007186//G protein-coupled receptor signaling pathway;GO:0007196//adenylate cyclase-inhibiting G protein-coupled glutamate receptor signaling pathway;GO:0007216//G protein-coupled glutamate receptor signaling pathway;GO:0010467//gene expression;GO:0014047//glutamate secretion;GO:0014048//regulation of glutamate secretion;GO:0014059…	--
ENSMUSG00000023328	0.344	0.355	0.148	1.728	1.987	2.538	5	5	2	26	33	36	Ache	acetylcholinesterase [Source:MGI Symbol;Acc:MGI:87876]	Organismal Systems;Metabolism	Nervous system;Lipid metabolism	ko04725//Cholinergic synapse;ko00564//Glycerophospholipid metabolism	K01049;K01049	GO:0005576//extracellular region;GO:0005604//basement membrane;GO:0005615//extracellular space;GO:0005635//nuclear envelope;GO:0005737//cytoplasm;GO:0005788//endoplasmic reticulum lumen;GO:0005791//rough endoplasmic reticulum;GO:0005794//Golgi apparatus;GO:0005886//plasma membrane;GO:0009986//cell surface;GO:0016020//membrane;GO:0030424//axon;GO:0030425//dendrite;GO:0031594//neuromuscular junctio…	GO:0003990//acetylcholinesterase activity;GO:0004104//cholinesterase activity;GO:0005515//protein binding;GO:0005518//collagen binding;GO:0016787//hydrolase activity;GO:0017171//serine hydrolase activity;GO:0033265//choline binding;GO:0042166//acetylcholine binding;GO:0042802//identical protein binding;GO:0042803//protein homodimerization activity;GO:0043236//laminin binding;GO:0043621//protein s…	GO:0001919//regulation of receptor recycling;GO:0002076//osteoblast development;GO:0006581//acetylcholine catabolic process;GO:0007155//cell adhesion;GO:0007416//synapse assembly;GO:0008291//acetylcholine metabolic process;GO:0019695//choline metabolic process;GO:0031623//receptor internalization;GO:0032868//response to insulin;GO:0042135//neurotransmitter catabolic process;GO:0046677//response t…	--
ENSMUSG00000023391	7.069	9.422	9.878	1.998	2.437	2.365	121	151	173	34	46	38	Dlx2	distal-less homeobox 2 [Source:MGI Symbol;Acc:MGI:94902]	-	-	-	-	GO:0005634//nucleus	GO:0000977//RNA polymerase II transcription regulatory region sequence-specific DNA binding;GO:0000978//RNA polymerase II cis-regulatory region sequence-specific DNA binding;GO:0000981//DNA-binding transcription factor activity, RNA polymerase II-specific;GO:0001228//DNA-binding transcription activator activity, RNA polymerase II-specific;GO:0003677//DNA binding;GO:0003682//chromatin binding;GO:0…	GO:0000122//negative regulation of transcription by RNA polymerase II;GO:0006355//regulation of transcription, DNA-templated;GO:0006357//regulation of transcription by RNA polymerase II;GO:0007219//Notch signaling pathway;GO:0009954//proximal/distal pattern formation;GO:0014016//neuroblast differentiation;GO:0021544//subpallium development;GO:0021766//hippocampus development;GO:0021772//olfactory…	Homeobox
ENSMUSG00000023411	0.274	0.236	0.299	0.553	0.799	0.997	6	5	8	14	20	21	Nfatc4	nuclear factor of activated T cells, cytoplasmic, calcineurin dependent 4 [Source:MGI Symbol;Acc:MGI:1920431]	Human Diseases;Human Diseases;Human Diseases;Human Diseases;Organismal Systems;Cellular Processes;Environmental Information Processing;Environmental Information Processing;Human Diseases;Organismal Systems;Organismal Systems	Infectious disease: viral;Infectious disease: viral;Infectious disease: viral;Infectious disease: viral;Development and regeneration;Cell growth and death;Signal transduction;Signal transduction;Infectious disease: viral;Endocrine system;Immune system	ko05163//Human cytomegalovirus infection;ko05166//Human T-cell leukemia virus 1 infection;ko05170//Human immunodeficiency virus 1 infection;ko05167//Kaposi sarcoma-associated herpesvirus infection;ko04360//Axon guidance;ko04218//Cellular senescence;ko04022//cGMP-PKG signaling pathway;ko04310//Wnt signaling pathway;ko05161//Hepatitis B;ko04921//Oxytocin signaling pathway;ko04625//C-type lectin rec…	K17334;K17334;K17334;K17334;K17334;K17334;K17334;K17334;K17334;K17334;K17334	GO:0005634//nucleus;GO:0005667//transcription regulator complex;GO:0005737//cytoplasm;GO:0005829//cytosol;GO:0016607//nuclear speck	GO:0000978//RNA polymerase II cis-regulatory region sequence-specific DNA binding;GO:0000981//DNA-binding transcription factor activity, RNA polymerase II-specific;GO:0001227//DNA-binding transcription repressor activity, RNA polymerase II-specific;GO:0003677//DNA binding;GO:0003700//DNA-binding transcription factor activity;GO:0005515//protein binding;GO:0042975//peroxisome proliferator activate…	GO:0000122//negative regulation of transcription by RNA polymerase II;GO:0001569//branching involved in blood vessel morphogenesis;GO:0006355//regulation of transcription, DNA-templated;GO:0006357//regulation of transcription by RNA polymerase II;GO:0006366//transcription by RNA polymerase II;GO:0007507//heart development;GO:0007616//long-term memory;GO:0008630//intrinsic apoptotic signaling path…	RHD
ENSMUSG00000023951	12.204	13.502	14.281	167.226	167.439	170.597	271	273	299	3636	4130	3602	Vegfa	vascular endothelial growth factor A [Source:MGI Symbol;Acc:MGI:103178]	Human Diseases;Environmental Information Processing;Environmental Information Processing;Human Diseases;Environmental Information Processing;Human Diseases;Environmental Information Processing;Human Diseases;Human Diseases;Environmental Information Processing;Human Diseases;Human Diseases;Human Diseases;Cellular Processes;Human Diseases;Human Diseases;Organismal Systems;Environmental Information …	Cancer: overview;Signal transduction;Signal transduction;Infectious disease: viral;Signal transduction;Infectious disease: viral;Signal transduction;Cancer: overview;Infectious disease: viral;Signal transduction;Cancer: overview;Immune disease;Cancer: overview;Cellular community - eukaryotes;Cancer: overview;Cardiovascular disease;Endocrine system;Signal transduction;Endocrine and metabolic disea…	ko05200//Pathways in cancer;ko04151//PI3K-Akt signaling pathway;ko04020//Calcium signaling pathway;ko05165//Human papillomavirus infection;ko04010//MAPK signaling pathway;ko05163//Human cytomegalovirus infection;ko04014//Ras signaling pathway;ko05208//Chemical carcinogenesis - reactive oxygen species;ko05167//Kaposi sarcoma-associated herpesvirus infection;ko04015//Rap1 signaling pathway;ko05207/…	K05448;K05448;K05448;K05448;K05448;K05448;K05448;K05448;K05448;K05448;K05448;K05448;K05448;K05448;K05448;K05448;K05448;K05448;K05448;K05448;K05448;K05448;K05448;K05448	GO:0005576//extracellular region;GO:0005604//basement membrane;GO:0005615//extracellular space;GO:0005634//nucleus;GO:0005737//cytoplasm;GO:0005886//plasma membrane;GO:0005912//adherens junction;GO:0009986//cell surface;GO:0016020//membrane;GO:0030141//secretory granule;GO:0031982//vesicle;GO:1990150//VEGF-A complex	GO:0001968//fibronectin binding;GO:0005125//cytokine activity;GO:0005161//platelet-derived growth factor receptor binding;GO:0005172//vascular endothelial growth factor receptor binding;GO:0005515//protein binding;GO:0008083//growth factor activity;GO:0008201//heparin binding;GO:0019838//growth factor binding;GO:0038191//neuropilin binding;GO:0042056//chemoattractant activity;GO:0042802//identica…	GO:0000122//negative regulation of transcription by RNA polymerase II;GO:0001525//angiogenesis;GO:0001541//ovarian follicle development;GO:0001568//blood vessel development;GO:0001569//branching involved in blood vessel morphogenesis;GO:0001666//response to hypoxia;GO:0001701//in utero embryonic development;GO:0001822//kidney development;GO:0001934//positive regulation of protein phosphorylation;…	--
ENSMUSG00000023959	0.148	0.184	0.241	0.818	0.671	1.208	6	7	10	33	30	46	Clic5	chloride intracellular channel 5 [Source:MGI Symbol;Acc:MGI:1917912]	-	-	-	-	GO:0005737//cytoplasm;GO:0005794//Golgi apparatus;GO:0005815//microtubule organizing center;GO:0005856//cytoskeleton;GO:0005886//plasma membrane;GO:0005938//cell cortex;GO:0015629//actin cytoskeleton;GO:0016020//membrane;GO:0016324//apical plasma membrane;GO:0032420//stereocilium;GO:0032421//stereocilium bundle;GO:0034707//chloride channel complex	GO:0005244//voltage-gated ion channel activity;GO:0005254//chloride channel activity	GO:0002021//response to dietary excess;GO:0002024//diet induced thermogenesis;GO:0006811//ion transport;GO:0006821//chloride transport;GO:0007601//visual perception;GO:0007605//sensory perception of sound;GO:0008104//protein localization;GO:0034220//ion transmembrane transport;GO:0034765//regulation of ion transmembrane transport;GO:0050885//neuromuscular process controlling balance;GO:0050896//r…	--
ENSMUSG00000023990	21.817	20.425	22.327	7.177	6.511	8.135	353	310	350	107	111	118	Tfeb	transcription factor EB [Source:MGI Symbol;Acc:MGI:103270]	Cellular Processes	Transport and catabolism	ko04137//Mitophagy - animal	K15590	GO:0005634//nucleus;GO:0005667//transcription regulator complex;GO:0005737//cytoplasm;GO:0005764//lysosome;GO:0005765//lysosomal membrane;GO:0005829//cytosol;GO:0016020//membrane	GO:0000976//transcription cis-regulatory region binding;GO:0000978//RNA polymerase II cis-regulatory region sequence-specific DNA binding;GO:0000981//DNA-binding transcription factor activity, RNA polymerase II-specific;GO:0001228//DNA-binding transcription activator activity, RNA polymerase II-specific;GO:0003677//DNA binding;GO:0003700//DNA-binding transcription factor activity;GO:0019899//enzy…	GO:0001892//embryonic placenta development;GO:0002250//adaptive immune response;GO:0002376//immune system process;GO:0006355//regulation of transcription, DNA-templated;GO:0006357//regulation of transcription by RNA polymerase II;GO:0006914//autophagy;GO:0006959//humoral immune response;GO:0007040//lysosome organization;GO:0009267//cellular response to starvation;GO:0010468//regulation of gene ex…	bHLH
ENSMUSG00000024030	5.822	3.704	6.246	1.767	1.977	2.209	130	140	164	66	88	79	Abcg1	ATP binding cassette subfamily G member 1 [Source:MGI Symbol;Acc:MGI:107704]	Human Diseases;Environmental Information Processing	Cardiovascular disease;Membrane transport	ko05417//Lipid and atherosclerosis;ko02010//ABC transporters	K05679;K05679	GO:0000139//Golgi membrane;GO:0005739//mitochondrion;GO:0005768//endosome;GO:0005783//endoplasmic reticulum;GO:0005789//endoplasmic reticulum membrane;GO:0005794//Golgi apparatus;GO:0005886//plasma membrane;GO:0009897//external side of plasma membrane;GO:0016020//membrane;GO:0016021//integral component of membrane;GO:0055037//recycling endosome	GO:0000166//nucleotide binding;GO:0005524//ATP binding;GO:0016887//ATP hydrolysis activity;GO:0019534//toxin transmembrane transporter activity;GO:0034041//ABC-type sterol transporter activity;GO:0042626//ATPase-coupled transmembrane transporter activity;GO:0042803//protein homodimerization activity;GO:0043531//ADP binding;GO:0046982//protein heterodimerization activity;GO:0090554//phosphatidylch…	GO:0006869//lipid transport;GO:0008203//cholesterol metabolic process;GO:0010033//response to organic substance;GO:0010745//negative regulation of macrophage derived foam cell differentiation;GO:0010875//positive regulation of cholesterol efflux;GO:0010888//negative regulation of lipid storage;GO:0030301//cholesterol transport;GO:0032367//intracellular cholesterol transport;GO:0033344//cholestero…	--
ENSMUSG00000024039	19.558	26.408	16.322	195.539	181.542	186.167	314	305	324.01	3105	3372	2946	Cbs	cystathionine beta-synthase [Source:MGI Symbol;Acc:MGI:88285]	Metabolism;Metabolism;Metabolism;Metabolism	Global and overview maps;Global and overview maps;Amino acid metabolism;Amino acid metabolism	ko01100//Metabolic pathways;ko01230//Biosynthesis of amino acids;ko00270//Cysteine and methionine metabolism;ko00260//Glycine, serine and threonine metabolism	K01697;K01697;K01697;K01697	GO:0005634//nucleus;GO:0005737//cytoplasm	GO:0004122//cystathionine beta-synthase activity;GO:0016829//lyase activity;GO:0019825//oxygen binding;GO:0019899//enzyme binding;GO:0020037//heme binding;GO:0030170//pyridoxal phosphate binding;GO:0031625//ubiquitin protein ligase binding;GO:0042802//identical protein binding;GO:0042803//protein homodimerization activity;GO:0043167//ion binding;GO:0046872//metal ion binding;GO:0050421//nitrite r…	GO:0001958//endochondral ossification;GO:0001974//blood vessel remodeling;GO:0006535//cysteine biosynthetic process from serine;GO:0006563//L-serine metabolic process;GO:0006565//L-serine catabolic process;GO:0006790//sulfur compound metabolic process;GO:0006801//superoxide metabolic process;GO:0008652//cellular amino acid biosynthetic process;GO:0010749//regulation of nitric oxide mediated signa…	--
ENSMUSG00000024044	35.502	34.018	30.736	9.603	8.54	10.954	855	756	740	215	226	249	Epb41l3	erythrocyte membrane protein band 4.1 like 3 [Source:MGI Symbol;Acc:MGI:103008]	-	-	-	-	GO:0005737//cytoplasm;GO:0005829//cytosol;GO:0005856//cytoskeleton;GO:0005886//plasma membrane;GO:0005911//cell-cell junction;GO:0014069//postsynaptic density;GO:0016020//membrane;GO:0030054//cell junction;GO:0030673//axolemma;GO:0033270//paranode region of axon;GO:0044224//juxtaparanode region of axon;GO:0070161//anchoring junction	GO:0003779//actin binding;GO:0005198//structural molecule activity;GO:0005200//structural constituent of cytoskeleton;GO:0005515//protein binding;GO:0008092//cytoskeletal protein binding;GO:0106006//cytoskeletal protein-membrane anchor activity	GO:0001558//regulation of cell growth;GO:0002175//protein localization to paranode region of axon;GO:0006915//apoptotic process;GO:0007010//cytoskeleton organization;GO:0008360//regulation of cell shape;GO:0030865//cortical cytoskeleton organization;GO:0030866//cortical actin cytoskeleton organization;GO:0030913//paranodal junction assembly;GO:0031032//actomyosin structure organization;GO:0043217…	--
ENSMUSG00000024053	0.112	0.816	0.71	2.302	1.047	1.368	3	20	17	28	30	35	Emilin2	elastin microfibril interfacer 2 [Source:MGI Symbol;Acc:MGI:2389136]	-	-	-	-	GO:0005576//extracellular region;GO:0005581//collagen trimer;GO:0062023//collagen-containing extracellular matrix;GO:1990971//EMILIN complex	GO:0005515//protein binding;GO:0030023//extracellular matrix constituent conferring elasticity	GO:0007155//cell adhesion;GO:0008217//regulation of blood pressure;GO:0030194//positive regulation of blood coagulation;GO:0030336//negative regulation of cell migration;GO:0033627//cell adhesion mediated by integrin;GO:0042127//regulation of cell population proliferation;GO:0043065//positive regulation of apoptotic process;GO:0045766//positive regulation of angiogenesis;GO:0048583//regulation of…	--
ENSMUSG00000024087	18.771	18.718	19.884	5.66	4.578	4.982	654	610	713	196	173	166	Cyp1b1	cytochrome P450, family 1, subfamily b, polypeptide 1 [Source:MGI Symbol;Acc:MGI:88590]	Human Diseases;Human Diseases;Human Diseases;Metabolism;Human Diseases;Metabolism;Organismal Systems;Metabolism	Cancer: overview;Cancer: overview;Cancer: overview;Lipid metabolism;Cancer: overview;Xenobiotics biodegradation and metabolism;Endocrine system;Amino acid metabolism	ko05208//Chemical carcinogenesis - reactive oxygen species;ko05207//Chemical carcinogenesis - receptor activation;ko05206//MicroRNAs in cancer;ko00140//Steroid hormone biosynthesis;ko05204//Chemical carcinogenesis - DNA adducts;ko00980//Metabolism of xenobiotics by cytochrome P450;ko04913//Ovarian steroidogenesis;ko00380//Tryptophan metabolism	K07410;K07410;K07410;K07410;K07410;K07410;K07410;K07410	GO:0005634//nucleus;GO:0005739//mitochondrion;GO:0005783//endoplasmic reticulum;GO:0005789//endoplasmic reticulum membrane;GO:0016020//membrane;GO:0043231//intracellular membrane-bounded organelle	GO:0004497//monooxygenase activity;GO:0005506//iron ion binding;GO:0016491//oxidoreductase activity;GO:0016705//oxidoreductase activity, acting on paired donors, with incorporation or reduction of molecular oxygen;GO:0016712//oxidoreductase activity, acting on paired donors, with incorporation or reduction of molecular oxygen, reduced flavin or flavoprotein as one donor, and incorporation of one …	GO:0001525//angiogenesis;GO:0002930//trabecular meshwork development;GO:0006304//DNA modification;GO:0006629//lipid metabolic process;GO:0006631//fatty acid metabolic process;GO:0006725//cellular aromatic compound metabolic process;GO:0006805//xenobiotic metabolic process;GO:0006809//nitric oxide biosynthetic process;GO:0007155//cell adhesion;GO:0007584//response to nutrient;GO:0008202//steroid m…	--
ENSMUSG00000024140	102.982	103.952	105.848	17.2	17.175	17.885	3932	3716	4135	653	723	641	Epas1	endothelial PAS domain protein 1 [Source:MGI Symbol;Acc:MGI:109169]	Human Diseases;Human Diseases	Cancer: overview;Cancer: specific types	ko05200//Pathways in cancer;ko05211//Renal cell carcinoma	K09095;K09095	GO:0005634//nucleus;GO:0005667//transcription regulator complex;GO:0005737//cytoplasm;GO:0016607//nuclear speck	GO:0000977//RNA polymerase II transcription regulatory region sequence-specific DNA binding;GO:0000978//RNA polymerase II cis-regulatory region sequence-specific DNA binding;GO:0000981//DNA-binding transcription factor activity, RNA polymerase II-specific;GO:0000987//cis-regulatory region sequence-specific DNA binding;GO:0001223//transcription coactivator binding;GO:0001228//DNA-binding transcrip…	GO:0000122//negative regulation of transcription by RNA polymerase II;GO:0001525//angiogenesis;GO:0001666//response to hypoxia;GO:0001892//embryonic placenta development;GO:0001974//blood vessel remodeling;GO:0002027//regulation of heart rate;GO:0002070//epithelial cell maturation;GO:0006355//regulation of transcription, DNA-templated;GO:0006357//regulation of transcription by RNA polymerase II;G…	Others
ENSMUSG00000024180	6.222	5.958	6.135	1.831	1.625	1.905	128	109	122	37	35	39	Pgap6	post-glycosylphosphatidylinositol attachment to proteins 6 [Source:MGI Symbol;Acc:MGI:1926283]	-	-	-	-	GO:0005764//lysosome;GO:0005765//lysosomal membrane;GO:0005886//plasma membrane;GO:0016020//membrane;GO:0016021//integral component of membrane	GO:0003674//molecular_function;GO:0004623//phospholipase A2 activity;GO:0016787//hydrolase activity	GO:0006629//lipid metabolic process;GO:0008150//biological_process	--
ENSMUSG00000024235	1.406	0.901	2.952	3.942	4.234	3.654	25	15	49	66	83	61	Map3k8	mitogen-activated protein kinase kinase kinase 8 [Source:MGI Symbol;Acc:MGI:1346878]	Environmental Information Processing;Environmental Information Processing;Organismal Systems;Organismal Systems	Signal transduction;Signal transduction;Immune system;Immune system	ko04010//MAPK signaling pathway;ko04668//TNF signaling pathway;ko04660//T cell receptor signaling pathway;ko04620//Toll-like receptor signaling pathway	K04415;K04415;K04415;K04415	GO:0005737//cytoplasm;GO:0005829//cytosol	GO:0000166//nucleotide binding;GO:0000287//magnesium ion binding;GO:0004672//protein kinase activity;GO:0004674//protein serine/threonine kinase activity;GO:0004709//MAP kinase kinase kinase activity;GO:0005524//ATP binding;GO:0016301//kinase activity;GO:0016740//transferase activity;GO:0046872//metal ion binding;GO:0106310//protein serine kinase activity	GO:0000165//MAPK cascade;GO:0002376//immune system process;GO:0006468//protein phosphorylation;GO:0007049//cell cycle;GO:0007165//signal transduction;GO:0016310//phosphorylation;GO:1990349//gap junction-mediated intercellular transport	--
ENSMUSG00000024268	14.069	13.373	13.948	3.187	2.432	3.296	333	302	339	70	67	51	Celf4	CUGBP, Elav-like family member 4 [Source:MGI Symbol;Acc:MGI:1932407]	-	-	-	-	GO:0005634//nucleus;GO:0005654//nucleoplasm;GO:0005737//cytoplasm;GO:0098794//postsynapse;GO:1990904//ribonucleoprotein complex	GO:0003676//nucleic acid binding;GO:0003723//RNA binding;GO:0003729//mRNA binding;GO:0036002//pre-mRNA binding;GO:0042835//BRE binding	GO:0000380//alternative mRNA splicing, via spliceosome;GO:0000381//regulation of alternative mRNA splicing, via spliceosome;GO:0001701//in utero embryonic development;GO:0006376//mRNA splice site selection;GO:0006397//mRNA processing;GO:0008380//RNA splicing;GO:0048025//negative regulation of mRNA splicing, via spliceosome;GO:0048026//positive regulation of mRNA splicing, via spliceosome;GO:00600…	--
ENSMUSG00000024395	54.725	60.391	62.066	13.461	12.731	12.559	551.21	576.54	628.43	145	148.23	131.12	Lims2	LIM and senescent cell antigen like domains 2 [Source:MGI Symbol;Acc:MGI:2385067]	-	-	-	-	GO:0005737//cytoplasm;GO:0005886//plasma membrane;GO:0005911//cell-cell junction;GO:0005925//focal adhesion;GO:0016020//membrane;GO:0070161//anchoring junction;GO:0110165//cellular anatomical entity	GO:0003674//molecular_function;GO:0046872//metal ion binding	GO:0007229//integrin-mediated signaling pathway;GO:0043066//negative regulation of apoptotic process;GO:0045216//cell-cell junction organization;GO:0061351//neural precursor cell proliferation;GO:0098609//cell-cell adhesion;GO:1900026//positive regulation of substrate adhesion-dependent cell spreading;GO:1904055//negative regulation of cholangiocyte proliferation;GO:1990705//cholangiocyte prolife…	--
ENSMUSG00000024479	0.49	0.105	0.479	0	0	0	10	2	10	0	0	0	Mal2	mal, T cell differentiation protein 2 [Source:MGI Symbol;Acc:MGI:2146021]	-	-	-	-	GO:0005886//plasma membrane;GO:0016020//membrane;GO:0016324//apical plasma membrane;GO:0030672//synaptic vesicle membrane;GO:0045121//membrane raft;GO:0098686//hippocampal mossy fiber to CA3 synapse;GO:0098978//glutamatergic synapse;GO:0110165//cellular anatomical entity	GO:0019911//structural constituent of myelin sheath	GO:0042552//myelination;GO:0045056//transcytosis	--
ENSMUSG00000024524	11.418	10.544	12.313	4.496	4.316	3.659	413.83	376.65	454.93	167.12	184.36	131.46	Gnal	guanine nucleotide binding protein, alpha stimulating, olfactory type [Source:MGI Symbol;Acc:MGI:95774]	Organismal Systems;Environmental Information Processing;Human Diseases;Human Diseases;Organismal Systems;Human Diseases	Sensory system;Signal transduction;Neurodegenerative disease;Infectious disease: parasitic;Nervous system;Infectious disease: parasitic	ko04740//Olfactory transduction;ko04020//Calcium signaling pathway;ko05012//Parkinson disease;ko05146//Amoebiasis;ko04728//Dopaminergic synapse;ko05142//Chagas disease	K04633;K04633;K04633;K04633;K04633;K04633	GO:0005834//heterotrimeric G-protein complex;GO:0005886//plasma membrane	GO:0000166//nucleotide binding;GO:0001664//G protein-coupled receptor binding;GO:0003924//GTPase activity;GO:0005525//GTP binding;GO:0019001//guanyl nucleotide binding;GO:0031683//G-protein beta/gamma-subunit complex binding;GO:0046872//metal ion binding	GO:0001975//response to amphetamine;GO:0007165//signal transduction;GO:0007186//G protein-coupled receptor signaling pathway;GO:0007188//adenylate cyclase-modulating G protein-coupled receptor signaling pathway;GO:0007189//adenylate cyclase-activating G protein-coupled receptor signaling pathway;GO:0007190//activation of adenylate cyclase activity;GO:0007191//adenylate cyclase-activating dopamine…	--
ENSMUSG00000024529	5.507	4.947	4.659	1.238	1.204	1.244	175	147	154	39	42	38	Lox	lysyl oxidase [Source:MGI Symbol;Acc:MGI:96817]	-	-	-	-	GO:0005576//extracellular region;GO:0005581//collagen trimer;GO:0005615//extracellular space;GO:0005634//nucleus;GO:0031012//extracellular matrix;GO:0062023//collagen-containing extracellular matrix	GO:0004720//protein-lysine 6-oxidase activity;GO:0005507//copper ion binding;GO:0005515//protein binding;GO:0005518//collagen binding;GO:0016491//oxidoreductase activity;GO:0016641//oxidoreductase activity, acting on the CH-NH2 group of donors, oxygen as acceptor;GO:0036094//small molecule binding;GO:0046872//metal ion binding;GO:0060090//molecular adaptor activity	GO:0001568//blood vessel development;GO:0001649//osteoblast differentiation;GO:0001932//regulation of protein phosphorylation;GO:0007507//heart development;GO:0009410//response to xenobiotic stimulus;GO:0009725//response to hormone;GO:0010468//regulation of gene expression;GO:0016202//regulation of striated muscle tissue development;GO:0017015//regulation of transforming growth factor beta recept…	--
ENSMUSG00000024538	37.687	36.514	35.828	119.094	118.427	120.666	366	332	356	1150	1268	1100	Ppic	peptidylprolyl isomerase C [Source:MGI Symbol;Acc:MGI:97751]	-	-	-	-	GO:0005737//cytoplasm;GO:0043231//intracellular membrane-bounded organelle	GO:0003755//peptidyl-prolyl cis-trans isomerase activity;GO:0005515//protein binding;GO:0016018//cyclosporin A binding;GO:0016853//isomerase activity	GO:0000413//protein peptidyl-prolyl isomerization;GO:0006457//protein folding	--
ENSMUSG00000024620	17.153	18.122	17.653	1.774	1.454	1.452	642	635	676	66	60	51	Pdgfrb	platelet derived growth factor receptor, beta polypeptide [Source:MGI Symbol;Acc:MGI:97531]	Human Diseases;Environmental Information Processing;Environmental Information Processing;Human Diseases;Environmental Information Processing;Environmental Information Processing;Environmental Information Processing;Cellular Processes;Environmental Information Processing;Cellular Processes;Environmental Information Processing;Human Diseases;Human Diseases;Human Diseases;Cellular Processes;Human Di…	Cancer: overview;Signal transduction;Signal transduction;Infectious disease: viral;Signal transduction;Signal transduction;Signal transduction;Cell motility;Signal transduction;Cellular community - eukaryotes;Signal transduction;Cancer: overview;Cancer: specific types;Cancer: overview;Cellular community - eukaryotes;Drug resistance: antineoplastic;Cancer: specific types;Cancer: specific types;Can…	ko05200//Pathways in cancer;ko04151//PI3K-Akt signaling pathway;ko04020//Calcium signaling pathway;ko05165//Human papillomavirus infection;ko04010//MAPK signaling pathway;ko04072//Phospholipase D signaling pathway;ko04014//Ras signaling pathway;ko04810//Regulation of actin cytoskeleton;ko04015//Rap1 signaling pathway;ko04510//Focal adhesion;ko04630//JAK-STAT signaling pathway;ko05206//MicroRNAs i…	K05089;K05089;K05089;K05089;K05089;K05089;K05089;K05089;K05089;K05089;K05089;K05089;K05089;K05089;K05089;K05089;K05089;K05089;K05089	GO:0001726//ruffle;GO:0005634//nucleus;GO:0005737//cytoplasm;GO:0005764//lysosome;GO:0005794//Golgi apparatus;GO:0005886//plasma membrane;GO:0009986//cell surface;GO:0016020//membrane;GO:0016324//apical plasma membrane;GO:0031410//cytoplasmic vesicle;GO:0043202//lysosomal lumen;GO:0043231//intracellular membrane-bounded organelle;GO:0043235//receptor complex	GO:0000166//nucleotide binding;GO:0004672//protein kinase activity;GO:0004713//protein tyrosine kinase activity;GO:0004714//transmembrane receptor protein tyrosine kinase activity;GO:0005017//platelet-derived growth factor-activated receptor activity;GO:0005019//platelet-derived growth factor beta-receptor activity;GO:0005102//signaling receptor binding;GO:0005161//platelet-derived growth factor …	GO:0001525//angiogenesis;GO:0001568//blood vessel development;GO:0001701//in utero embryonic development;GO:0001822//kidney development;GO:0001894//tissue homeostasis;GO:0006024//glycosaminoglycan biosynthetic process;GO:0006468//protein phosphorylation;GO:0006807//nitrogen compound metabolic process;GO:0006935//chemotaxis;GO:0007165//signal transduction;GO:0007169//transmembrane receptor protein…	--
ENSMUSG00000024647	17.655	23.879	17.314	3.014	4.778	3.216	291	354	288	51	77	52	Cbln2	cerebellin 2 precursor protein [Source:MGI Symbol;Acc:MGI:88282]	-	-	-	-	GO:0005576//extracellular region;GO:0005615//extracellular space;GO:0045202//synapse;GO:0098978//glutamatergic synapse	GO:0005515//protein binding	GO:0007416//synapse assembly;GO:0050804//modulation of chemical synaptic transmission;GO:0050808//synapse organization;GO:0051965//positive regulation of synapse assembly;GO:0098814//spontaneous synaptic transmission;GO:0099558//maintenance of synapse structure;GO:1905606//regulation of presynapse assembly	--
ENSMUSG00000024899	14.06	16.258	16.112	1.493	2.187	1.437	327	324	368	33	54	30	Papss2	3'-phosphoadenosine 5'-phosphosulfate synthase 2 [Source:MGI Symbol;Acc:MGI:1330223]	Metabolism;Metabolism;Metabolism;Metabolism;Metabolism	Global and overview maps;Nucleotide metabolism;Metabolism of other amino acids;Energy metabolism;Biosynthesis of other secondary metabolites	ko01100//Metabolic pathways;ko00230//Purine metabolism;ko00450//Selenocompound metabolism;ko00920//Sulfur metabolism;ko00261//Monobactam biosynthesis	K13811;K13811;K13811;K13811;K13811	GO:0005829//cytosol	GO:0000166//nucleotide binding;GO:0003824//catalytic activity;GO:0004020//adenylylsulfate kinase activity;GO:0004781//sulfate adenylyltransferase (ATP) activity;GO:0005524//ATP binding;GO:0016301//kinase activity;GO:0016740//transferase activity;GO:0016779//nucleotidyltransferase activity	GO:0000103//sulfate assimilation;GO:0006790//sulfur compound metabolic process;GO:0007596//blood coagulation;GO:0008152//metabolic process;GO:0009152//purine ribonucleotide biosynthetic process;GO:0016310//phosphorylation;GO:0034030//ribonucleoside bisphosphate biosynthetic process;GO:0034033//purine nucleoside bisphosphate biosynthetic process;GO:0042445//hormone metabolic process;GO:0050428//3'…	--
ENSMUSG00000024942	8.622	8.007	8.401	2.478	2.781	2.5	184	160	183	53	57	50	Capn1	calpain 1 [Source:MGI Symbol;Acc:MGI:88263]	Human Diseases;Human Diseases;Human Diseases;Cellular Processes;Cellular Processes;Genetic Information Processing;Cellular Processes	Neurodegenerative disease;Neurodegenerative disease;Infectious disease: bacterial;Cell growth and death;Cell growth and death;Folding, sorting and degradation;Cell growth and death	ko05022//Pathways of neurodegeneration - multiple diseases;ko05010//Alzheimer disease;ko05131//Shigellosis;ko04218//Cellular senescence;ko04217//Necroptosis;ko04141//Protein processing in endoplasmic reticulum;ko04210//Apoptosis	K01367;K01367;K01367;K01367;K01367;K01367;K01367	GO:0001533//cornified envelope;GO:0005737//cytoplasm;GO:0005739//mitochondrion;GO:0005764//lysosome;GO:0005829//cytosol;GO:0005886//plasma membrane;GO:0016020//membrane;GO:0110158//calpain complex	GO:0004198//calcium-dependent cysteine-type endopeptidase activity;GO:0005509//calcium ion binding;GO:0005515//protein binding;GO:0008092//cytoskeletal protein binding;GO:0008233//peptidase activity;GO:0008234//cysteine-type peptidase activity;GO:0016787//hydrolase activity;GO:0019899//enzyme binding;GO:0046872//metal ion binding	GO:0006508//proteolysis;GO:0010666//positive regulation of cardiac muscle cell apoptotic process;GO:0016540//protein autoprocessing;GO:0030163//protein catabolic process;GO:0030837//negative regulation of actin filament polymerization;GO:0032801//receptor catabolic process;GO:0043117//positive regulation of vascular permeability;GO:0050790//regulation of catalytic activity;GO:0060056//mammary gla…	--
ENSMUSG00000025020	1.707	1.671	1.497	7.421	7.229	6.938	65	55	58	277	294	244	Slit1	slit guidance ligand 1 [Source:MGI Symbol;Acc:MGI:1315203]	Organismal Systems	Development and regeneration	ko04360//Axon guidance	K06838	GO:0005576//extracellular region;GO:0005615//extracellular space;GO:0005886//plasma membrane	GO:0005102//signaling receptor binding;GO:0005509//calcium ion binding;GO:0005515//protein binding;GO:0008201//heparin binding;GO:0043395//heparan sulfate proteoglycan binding;GO:0048495//Roundabout binding	GO:0007097//nuclear migration;GO:0007399//nervous system development;GO:0007409//axonogenesis;GO:0007411//axon guidance;GO:0007420//brain development;GO:0008045//motor neuron axon guidance;GO:0016043//cellular component organization;GO:0021510//spinal cord development;GO:0021772//olfactory bulb development;GO:0022028//tangential migration from the subventricular zone to the olfactory bulb;GO:0022…	--
ENSMUSG00000025083	92.708	91.131	88.687	15.623	14.028	14.354	2268	2087	2222	382	378	330	Afap1l2	actin filament associated protein 1-like 2 [Source:MGI Symbol;Acc:MGI:2147658]	-	-	-	-	GO:0005737//cytoplasm;GO:0005829//cytosol;GO:0005886//plasma membrane	GO:0005515//protein binding;GO:0017124//SH3 domain binding;GO:0030296//protein tyrosine kinase activator activity;GO:0035591//signaling adaptor activity;GO:0042169//SH2 domain binding	GO:0006954//inflammatory response;GO:0007346//regulation of mitotic cell cycle;GO:0009966//regulation of signal transduction;GO:0032675//regulation of interleukin-6 production;GO:0032757//positive regulation of interleukin-8 production;GO:0045742//positive regulation of epidermal growth factor receptor signaling pathway;GO:0045893//positive regulation of transcription, DNA-templated	--
ENSMUSG00000025085	12.217	11.586	11.544	4.915	4.952	4.575	461	405	472	195	219	174	Ablim1	actin-binding LIM protein 1 [Source:MGI Symbol;Acc:MGI:1194500]	Organismal Systems	Development and regeneration	ko04360//Axon guidance	K07520	GO:0001725//stress fiber;GO:0005737//cytoplasm;GO:0005856//cytoskeleton;GO:0014069//postsynaptic density;GO:0015629//actin cytoskeleton;GO:0030027//lamellipodium;GO:0110165//cellular anatomical entity	GO:0003779//actin binding;GO:0005515//protein binding;GO:0046872//metal ion binding;GO:0051015//actin filament binding	GO:0006366//transcription by RNA polymerase II;GO:0007010//cytoskeleton organization;GO:0007411//axon guidance;GO:0030032//lamellipodium assembly;GO:0045944//positive regulation of transcription by RNA polymerase II;GO:0060271//cilium assembly	--
ENSMUSG00000025128	2.722	3.645	3.462	0.261	0.353	0.184	63	79	82	6	9	4	Bhlhe22	basic helix-loop-helix family, member e22 [Source:MGI Symbol;Acc:MGI:1930001]	-	-	-	-	GO:0005634//nucleus	GO:0000981//DNA-binding transcription factor activity, RNA polymerase II-specific;GO:0046983//protein dimerization activity;GO:1990837//sequence-specific double-stranded DNA binding	GO:0006355//regulation of transcription, DNA-templated;GO:0022008//neurogenesis	bHLH
ENSMUSG00000025161	0.127	0.423	0.476	3.855	3.243	3.75	2	6	6	59.27	54	62	Slc16a3	solute carrier family 16 (monocarboxylic acid transporters), member 3 [Source:MGI Symbol;Acc:MGI:1933438]	Human Diseases	Cancer: overview	ko05230//Central carbon metabolism in cancer	K08180	GO:0005886//plasma membrane;GO:0005887//integral component of plasma membrane;GO:0016020//membrane;GO:0016021//integral component of membrane;GO:0016323//basolateral plasma membrane;GO:0016324//apical plasma membrane;GO:0016328//lateral plasma membrane;GO:0031965//nuclear membrane;GO:0045202//synapse;GO:0098688//parallel fiber to Purkinje cell synapse;GO:0098839//postsynaptic density membrane	GO:0008028//monocarboxylic acid transmembrane transporter activity;GO:0015129//lactate transmembrane transporter activity;GO:0015293//symporter activity;GO:0015650//lactate:proton symporter activity;GO:0022857//transmembrane transporter activity;GO:0050833//pyruvate transmembrane transporter activity	GO:0015718//monocarboxylic acid transport;GO:0030163//protein catabolic process;GO:0035873//lactate transmembrane transport;GO:0035879//plasma membrane lactate transport;GO:0042867//pyruvate catabolic process;GO:0055085//transmembrane transport;GO:1901475//pyruvate transmembrane transport	--
ENSMUSG00000025213	0.419	1.006	1.125	2.316	2.469	2.677	4	9	11	22	26	24	Kazald1	Kazal-type serine peptidase inhibitor domain 1 [Source:MGI Symbol;Acc:MGI:2147606]	-	-	-	-	GO:0005576//extracellular region;GO:0005614//interstitial matrix;GO:0031012//extracellular matrix	GO:0005515//protein binding;GO:0005520//insulin-like growth factor binding	GO:0001503//ossification;GO:0001558//regulation of cell growth;GO:0009966//regulation of signal transduction;GO:0030154//cell differentiation;GO:0030198//extracellular matrix organization	--
ENSMUSG00000025225	3.937	5.33	5.941	16.448	17.557	16.868	89	115.16	137	381.68	444.39	362.76	Nfkb2	nuclear factor of kappa light polypeptide gene enhancer in B cells 2, p49/p100 [Source:MGI Symbol;Acc:MGI:1099800]	Human Diseases;Human Diseases;Environmental Information Processing;Human Diseases;Environmental Information Processing;Human Diseases;Human Diseases;Organismal Systems;Organismal Systems;Human Diseases	Cancer: overview;Infectious disease: viral;Signal transduction;Infectious disease: viral;Signal transduction;Cancer: overview;Cancer: specific types;Development and regeneration;Immune system;Infectious disease: bacterial	ko05200//Pathways in cancer;ko05169//Epstein-Barr virus infection;ko04010//MAPK signaling pathway;ko05166//Human T-cell leukemia virus 1 infection;ko04064//NF-kappa B signaling pathway;ko05203//Viral carcinogenesis;ko05224//Breast cancer;ko04380//Osteoclast differentiation;ko04625//C-type lectin receptor signaling pathway;ko05134//Legionellosis	K04469;K04469;K04469;K04469;K04469;K04469;K04469;K04469;K04469;K04469	GO:0005634//nucleus;GO:0005737//cytoplasm;GO:0005829//cytosol;GO:0033257//Bcl3/NF-kappaB2 complex;GO:0071159//NF-kappaB complex	GO:0000978//RNA polymerase II cis-regulatory region sequence-specific DNA binding;GO:0000981//DNA-binding transcription factor activity, RNA polymerase II-specific;GO:0001228//DNA-binding transcription activator activity, RNA polymerase II-specific;GO:0003677//DNA binding;GO:0003700//DNA-binding transcription factor activity;GO:0005515//protein binding;GO:1990837//sequence-specific double-strande…	GO:0002268//follicular dendritic cell differentiation;GO:0002467//germinal center formation;GO:0006355//regulation of transcription, DNA-templated;GO:0006357//regulation of transcription by RNA polymerase II;GO:0007165//signal transduction;GO:0009653//anatomical structure morphogenesis;GO:0030198//extracellular matrix organization;GO:0038061//NIK/NF-kappaB signaling;GO:0045944//positive regulatio…	RHD
ENSMUSG00000025257	0.383	0.409	0.468	2.505	3.476	2.756	4	4	5	26	40	27	Ribc1	RIB43A domain with coiled-coils 1 [Source:MGI Symbol;Acc:MGI:1913861]	-	-	-	-	GO:0005575//cellular_component	GO:0003674//molecular_function	GO:0008150//biological_process	--
ENSMUSG00000025318	17.784	17.772	18.478	4.474	3.403	3.639	445	414	471	112	92	86	Jph3	junctophilin 3 [Source:MGI Symbol;Acc:MGI:1891497]	-	-	-	-	GO:0005783//endoplasmic reticulum;GO:0005789//endoplasmic reticulum membrane;GO:0005886//plasma membrane;GO:0016020//membrane;GO:0030314//junctional membrane complex	-	GO:0007612//learning;GO:0007613//memory;GO:0035640//exploration behavior;GO:0040011//locomotion;GO:0048167//regulation of synaptic plasticity;GO:0048168//regulation of neuronal synaptic plasticity;GO:0050885//neuromuscular process controlling balance;GO:0060314//regulation of ryanodine-sensitive calcium-release channel activity	--
ENSMUSG00000025468	2.469	2.298	2.404	1.173	0.538	0.316	17	15	17	8	4	2	Caly	calcyon neuron-specific vesicular protein [Source:MGI Symbol;Acc:MGI:1915816]	Organismal Systems	Nervous system	ko04728//Dopaminergic synapse	K15493	GO:0005768//endosome;GO:0005886//plasma membrane;GO:0016020//membrane;GO:0016021//integral component of membrane;GO:0030424//axon;GO:0030659//cytoplasmic vesicle membrane;GO:0031410//cytoplasmic vesicle;GO:0098843//postsynaptic endocytic zone;GO:0098978//glutamatergic synapse;GO:1904115//axon cytoplasm	GO:0032051//clathrin light chain binding;GO:0044877//protein-containing complex binding	GO:0006897//endocytosis;GO:0007212//dopamine receptor signaling pathway;GO:0008089//anterograde axonal transport;GO:0016197//endosomal transport;GO:0045807//positive regulation of endocytosis;GO:0048268//clathrin coat assembly;GO:0098884//postsynaptic neurotransmitter receptor internalization;GO:1905445//positive regulation of clathrin coat assembly;GO:2001019//positive regulation of retrograde a…	--
ENSMUSG00000025478	91.911	97.73	93.181	19.36	18.154	22.74	1684	1691	1741	354	411	369	Dpysl4	dihydropyrimidinase-like 4 [Source:MGI Symbol;Acc:MGI:1349764]	-	-	-	-	GO:0005737//cytoplasm	GO:0016787//hydrolase activity;GO:0016810//hydrolase activity, acting on carbon-nitrogen (but not peptide) bonds;GO:0031005//filamin binding	GO:0070997//neuron death;GO:0097485//neuron projection guidance	--
ENSMUSG00000025511	167.987	167.676	166.877	18.685	16.679	21.057	1462.07	1386.33	1461.7	163.01	168.17	170.63	Tspan4	tetraspanin 4 [Source:MGI Symbol;Acc:MGI:1928097]	-	-	-	-	GO:0005886//plasma membrane;GO:0016020//membrane;GO:0016021//integral component of membrane;GO:0031982//vesicle;GO:0140494//migrasome	GO:0003823//antigen binding;GO:0005178//integrin binding;GO:0005515//protein binding	GO:0051881//regulation of mitochondrial membrane potential;GO:0065003//protein-containing complex assembly	--
ENSMUSG00000025558	84.082	87.69	85.746	5.909	4.677	5.55	3889	3802	4033	292	245	237	Dock9	dedicator of cytokinesis 9 [Source:MGI Symbol;Acc:MGI:106321]	-	-	-	-	-	GO:0005085//guanyl-nucleotide exchange factor activity	GO:0007264//small GTPase mediated signal transduction	--
ENSMUSG00000025582	5.428	5.501	6.279	52.525	50.586	54.812	196	186	232	1886	2014	1858	Nptx1	neuronal pentraxin 1 [Source:MGI Symbol;Acc:MGI:107811]	-	-	-	-	GO:0005737//cytoplasm;GO:0005739//mitochondrion;GO:0005886//plasma membrane;GO:0030133//transport vesicle;GO:0031410//cytoplasmic vesicle;GO:0043005//neuron projection;GO:0043083//synaptic cleft;GO:0098978//glutamatergic synapse	GO:0046872//metal ion binding	GO:0006839//mitochondrial transport;GO:0035865//cellular response to potassium ion;GO:0043653//mitochondrial fragmentation involved in apoptotic process;GO:0060385//axonogenesis involved in innervation;GO:0071333//cellular response to glucose stimulus;GO:0097107//postsynaptic density assembly;GO:0098962//regulation of postsynaptic neurotransmitter receptor activity;GO:0099645//neurotransmitter re…	--
ENSMUSG00000025592	5.441	5.099	5.494	2.346	2.43	2.846	151	134	135	72	80	73	Dach2	dachshund family transcription factor 2 [Source:MGI Symbol;Acc:MGI:1890446]	-	-	-	-	GO:0005634//nucleus;GO:0005667//transcription regulator complex	GO:0000978//RNA polymerase II cis-regulatory region sequence-specific DNA binding;GO:0000981//DNA-binding transcription factor activity, RNA polymerase II-specific;GO:0003677//DNA binding	GO:0006357//regulation of transcription by RNA polymerase II;GO:0046545//development of primary female sexual characteristics	DACH
ENSMUSG00000025608	13.107	12.45	13.519	2.593	2.728	3.634	488	434	515	96	112	127	Podxl	podocalyxin-like [Source:MGI Symbol;Acc:MGI:1351317]	Human Diseases	Infectious disease: bacterial	ko05132//Salmonella infection	K06817	GO:0001726//ruffle;GO:0005730//nucleolus;GO:0005737//cytoplasm;GO:0005886//plasma membrane;GO:0005902//microvillus;GO:0016020//membrane;GO:0016324//apical plasma membrane;GO:0030027//lamellipodium;GO:0030175//filopodium;GO:0031528//microvillus membrane;GO:0034451//centriolar satellite;GO:0036057//slit diaphragm;GO:0042995//cell projection;GO:0043231//intracellular membrane-bounded organelle;GO:00…	-	GO:0007155//cell adhesion;GO:0007162//negative regulation of cell adhesion;GO:0016477//cell migration;GO:0022407//regulation of cell-cell adhesion;GO:0022408//negative regulation of cell-cell adhesion;GO:0030335//positive regulation of cell migration;GO:0032534//regulation of microvillus assembly;GO:0033634//positive regulation of cell-cell adhesion mediated by integrin;GO:0050900//leukocyte migr…	--
ENSMUSG00000025701	1.715	2.241	1.449	0.206	0.517	0.258	31	37	27	4	9	3	Alox5	arachidonate 5-lipoxygenase [Source:MGI Symbol;Acc:MGI:87999]	Metabolism;Organismal Systems;Organismal Systems;Human Diseases;Metabolism;Organismal Systems	Global and overview maps;Immune system;Nervous system;Infectious disease: parasitic;Lipid metabolism;Endocrine system	ko01100//Metabolic pathways;ko04664//Fc epsilon RI signaling pathway;ko04726//Serotonergic synapse;ko05145//Toxoplasmosis;ko00590//Arachidonic acid metabolism;ko04913//Ovarian steroidogenesis	K00461;K00461;K00461;K00461;K00461;K00461	GO:0005634//nucleus;GO:0005635//nuclear envelope;GO:0005641//nuclear envelope lumen;GO:0005654//nucleoplasm;GO:0005737//cytoplasm;GO:0005829//cytosol;GO:0016020//membrane;GO:0016363//nuclear matrix;GO:0030425//dendrite;GO:0031965//nuclear membrane;GO:0042383//sarcolemma;GO:0048471//perinuclear region of cytoplasm	GO:0004051//arachidonate 5-lipoxygenase activity;GO:0004052//arachidonate 12(S)-lipoxygenase activity;GO:0005506//iron ion binding;GO:0005515//protein binding;GO:0016491//oxidoreductase activity;GO:0016702//oxidoreductase activity, acting on single donors with incorporation of molecular oxygen, incorporation of two atoms of oxygen;GO:0016787//hydrolase activity;GO:0036403//arachidonate 8(S)-lipox…	GO:0001937//negative regulation of endothelial cell proliferation;GO:0002232//leukocyte chemotaxis involved in inflammatory response;GO:0002523//leukocyte migration involved in inflammatory response;GO:0002526//acute inflammatory response;GO:0002540//leukotriene production involved in inflammatory response;GO:0006629//lipid metabolic process;GO:0006690//icosanoid metabolic process;GO:0006691//leu…	--
ENSMUSG00000025789	20.373	20.155	20.806	3.465	2.758	3.211	757	682	791	128	113	112	St8sia2	ST8 alpha-N-acetyl-neuraminide alpha-2,8-sialyltransferase 2 [Source:MGI Symbol;Acc:MGI:106020]	-	-	-	-	GO:0000139//Golgi membrane;GO:0005769//early endosome;GO:0005794//Golgi apparatus;GO:0005886//plasma membrane;GO:0016020//membrane;GO:0048471//perinuclear region of cytoplasm;GO:0055037//recycling endosome	GO:0003828//alpha-N-acetylneuraminate alpha-2,8-sialyltransferase activity;GO:0005515//protein binding;GO:0008373//sialyltransferase activity;GO:0016740//transferase activity;GO:0016757//glycosyltransferase activity	GO:0001574//ganglioside biosynthetic process;GO:0006486//protein glycosylation;GO:0006491//N-glycan processing;GO:0009311//oligosaccharide metabolic process;GO:0030182//neuron differentiation;GO:0042220//response to cocaine;GO:0051965//positive regulation of synapse assembly;GO:0097503//sialylation;GO:1901216//positive regulation of neuron death;GO:1990138//neuron projection extension	--
ENSMUSG00000025790	8.602	9.427	7.835	2.279	2.044	2.218	232	224	213	58	57	53	Slco3a1	solute carrier organic anion transporter family, member 3a1 [Source:MGI Symbol;Acc:MGI:1351867]	-	-	-	-	GO:0005886//plasma membrane;GO:0009925//basal plasma membrane;GO:0016020//membrane	GO:0005515//protein binding;GO:0008514//organic anion transmembrane transporter activity;GO:0015132//prostaglandin transmembrane transporter activity;GO:0015347//sodium-independent organic anion transmembrane transporter activity;GO:0022857//transmembrane transporter activity	GO:0001934//positive regulation of protein phosphorylation;GO:0006811//ion transport;GO:0015732//prostaglandin transport;GO:0043252//sodium-independent organic anion transport;GO:0051092//positive regulation of NF-kappaB transcription factor activity;GO:0055085//transmembrane transport	--
ENSMUSG00000025855	23.777	24.671	22.073	8.237	7.305	9.011	434	417	395	131	138	103	Prkar1b	protein kinase, cAMP dependent regulatory, type I beta [Source:MGI Symbol;Acc:MGI:97759]	Organismal Systems	Endocrine system	ko04910//Insulin signaling pathway	K04739	GO:0005737//cytoplasm;GO:0005771//multivesicular body;GO:0005886//plasma membrane;GO:0005952//cAMP-dependent protein kinase complex;GO:0016020//membrane;GO:0045202//synapse;GO:0098685//Schaffer collateral - CA1 synapse;GO:0098686//hippocampal mossy fiber to CA3 synapse;GO:0098794//postsynapse;GO:0098978//glutamatergic synapse	GO:0000166//nucleotide binding;GO:0004862//cAMP-dependent protein kinase inhibitor activity;GO:0008603//cAMP-dependent protein kinase regulator activity;GO:0030552//cAMP binding;GO:0034236//protein kinase A catalytic subunit binding;GO:0140678//molecular function inhibitor activity	GO:0001932//regulation of protein phosphorylation;GO:0006468//protein phosphorylation;GO:0007611//learning or memory;GO:0009887//animal organ morphogenesis;GO:0045859//regulation of protein kinase activity;GO:0050804//modulation of chemical synaptic transmission;GO:0098693//regulation of synaptic vesicle cycle;GO:1900273//positive regulation of long-term synaptic potentiation;GO:1903367//positive…	--
ENSMUSG00000025856	40.655	38.818	37.981	9.135	8.119	5.66	520	465	519	118	113	74	Pdgfa	platelet derived growth factor, alpha [Source:MGI Symbol;Acc:MGI:97527]	Human Diseases;Environmental Information Processing;Environmental Information Processing;Human Diseases;Environmental Information Processing;Environmental Information Processing;Environmental Information Processing;Cellular Processes;Environmental Information Processing;Cellular Processes;Environmental Information Processing;Human Diseases;Human Diseases;Human Diseases;Human Diseases;Cellular Pro…	Cancer: overview;Signal transduction;Signal transduction;Cancer: overview;Signal transduction;Signal transduction;Signal transduction;Cell motility;Signal transduction;Cellular community - eukaryotes;Signal transduction;Cancer: overview;Cardiovascular disease;Cancer: specific types;Cancer: overview;Cellular community - eukaryotes;Drug resistance: antineoplastic;Cancer: specific types;Cancer: spec…	ko05200//Pathways in cancer;ko04151//PI3K-Akt signaling pathway;ko04020//Calcium signaling pathway;ko05202//Transcriptional misregulation in cancer;ko04010//MAPK signaling pathway;ko04072//Phospholipase D signaling pathway;ko04014//Ras signaling pathway;ko04810//Regulation of actin cytoskeleton;ko04015//Rap1 signaling pathway;ko04510//Focal adhesion;ko04630//JAK-STAT signaling pathway;ko05206//Mi…	K04359;K04359;K04359;K04359;K04359;K04359;K04359;K04359;K04359;K04359;K04359;K04359;K04359;K04359;K04359;K04359;K04359;K04359;K04359	GO:0005576//extracellular region;GO:0005615//extracellular space;GO:0009986//cell surface;GO:0016020//membrane;GO:1990265//platelet-derived growth factor complex	GO:0005161//platelet-derived growth factor receptor binding;GO:0005518//collagen binding;GO:0008083//growth factor activity;GO:0042803//protein homodimerization activity;GO:0046982//protein heterodimerization activity;GO:0048407//platelet-derived growth factor binding	GO:0001666//response to hypoxia;GO:0007165//signal transduction;GO:0008284//positive regulation of cell population proliferation;GO:0008584//male gonad development;GO:0009410//response to xenobiotic stimulus;GO:0009611//response to wounding;GO:0010033//response to organic substance;GO:0010035//response to inorganic substance;GO:0010512//negative regulation of phosphatidylinositol biosynthetic pro…	--
ENSMUSG00000025875	47.292	45.177	41.488	9.909	13.083	11.219	338	296	313	68	97	76	Tspan17	tetraspanin 17 [Source:MGI Symbol;Acc:MGI:1921507]	-	-	-	-	GO:0016020//membrane;GO:0016021//integral component of membrane	GO:0019899//enzyme binding	GO:0072594//establishment of protein localization to organelle	--
ENSMUSG00000025885	1.649	1.912	1.894	0.36	0.581	0.697	74	43	90	16	14	14	Myo5b	myosin VB [Source:MGI Symbol;Acc:MGI:106598]	Human Diseases	Infectious disease: bacterial	ko05130//Pathogenic Escherichia coli infection	K10357	GO:0016459//myosin complex;GO:0032991//protein-containing complex;GO:0045179//apical cortex	GO:0000166//nucleotide binding;GO:0003774//cytoskeletal motor activity;GO:0003779//actin binding;GO:0005515//protein binding;GO:0005524//ATP binding;GO:0031267//small GTPase binding	GO:0016192//vesicle-mediated transport;GO:0016197//endosomal transport	--
ENSMUSG00000025909	2.971	2.763	2.714	0.789	0.402	0.766	91	75	81	22	13	21	Sntg1	syntrophin, gamma 1 [Source:MGI Symbol;Acc:MGI:1918346]	-	-	-	-	GO:0005737//cytoplasm;GO:0005856//cytoskeleton;GO:0032587//ruffle membrane	GO:0005198//structural molecule activity;GO:0005515//protein binding;GO:0008022//protein C-terminus binding	-	--
ENSMUSG00000025946	0.994	1.151	0.643	0.12	0.054	0.064	15	18	11	2	1	1	Pth2r	parathyroid hormone 2 receptor [Source:MGI Symbol;Acc:MGI:2180917]	Environmental Information Processing	Signaling molecules and interaction	ko04080//Neuroactive ligand-receptor interaction	K04586	GO:0005886//plasma membrane;GO:0016020//membrane;GO:0016021//integral component of membrane	GO:0004888//transmembrane signaling receptor activity;GO:0004930//G protein-coupled receptor activity;GO:0004991//parathyroid hormone receptor activity;GO:0008528//G protein-coupled peptide receptor activity;GO:0017046//peptide hormone binding	GO:0007165//signal transduction;GO:0007166//cell surface receptor signaling pathway;GO:0007186//G protein-coupled receptor signaling pathway;GO:0007188//adenylate cyclase-modulating G protein-coupled receptor signaling pathway;GO:0120162//positive regulation of cold-induced thermogenesis	--
ENSMUSG00000025993	2.315	2.106	2.053	0.647	0.505	0.594	54	46	49	15	13	13	Slc40a1	solute carrier family 40 (iron-regulated transporter), member 1 [Source:MGI Symbol;Acc:MGI:1315204]	Organismal Systems;Cellular Processes	Digestive system;Cell growth and death	ko04978//Mineral absorption;ko04216//Ferroptosis	K14685;K14685	GO:0005654//nucleoplasm;GO:0005829//cytosol;GO:0005886//plasma membrane;GO:0008021//synaptic vesicle;GO:0016020//membrane;GO:0016021//integral component of membrane;GO:0016323//basolateral plasma membrane	GO:0005381//iron ion transmembrane transporter activity;GO:0005515//protein binding;GO:0015093//ferrous iron transmembrane transporter activity;GO:0017046//peptide hormone binding;GO:0042802//identical protein binding;GO:0046872//metal ion binding	GO:0002260//lymphocyte homeostasis;GO:0003158//endothelium development;GO:0006366//transcription by RNA polymerase II;GO:0006811//ion transport;GO:0006826//iron ion transport;GO:0006879//cellular iron ion homeostasis;GO:0006915//apoptotic process;GO:0034395//regulation of transcription from RNA polymerase II promoter in response to iron;GO:0034755//iron ion transmembrane transport;GO:0043066//neg…	--
ENSMUSG00000026018	2.24	1.887	2.212	0.511	0.499	0.496	47	42	47	12	13	11	Ica1l	islet cell autoantigen 1-like [Source:MGI Symbol;Acc:MGI:1917625]	-	-	-	-	GO:0001669//acrosomal vesicle;GO:0005737//cytoplasm;GO:0005794//Golgi apparatus;GO:0012505//endomembrane system;GO:0043231//intracellular membrane-bounded organelle	GO:0005515//protein binding;GO:0019904//protein domain specific binding	GO:0007286//spermatid development;GO:0051049//regulation of transport	--
ENSMUSG00000026110	6.142	10.03	12.322	2.399	3.574	4.897	278	283	320	113	173	121	Mgat4a	mannoside acetylglucosaminyltransferase 4, isoenzyme A [Source:MGI Symbol;Acc:MGI:2662992]	Metabolism;Metabolism;Metabolism	Global and overview maps;Glycan biosynthesis and metabolism;Glycan biosynthesis and metabolism	ko01100//Metabolic pathways;ko00510//N-Glycan biosynthesis;ko00513//Various types of N-glycan biosynthesis	K00738;K00738;K00738	GO:0000139//Golgi membrane;GO:0005576//extracellular region;GO:0005777//peroxisome;GO:0005783//endoplasmic reticulum;GO:0005793//endoplasmic reticulum-Golgi intermediate compartment;GO:0005794//Golgi apparatus;GO:0005795//Golgi stack;GO:0016020//membrane	GO:0008375//acetylglucosaminyltransferase activity;GO:0008453//alanine-glyoxylate transaminase activity;GO:0008454//alpha-1,3-mannosylglycoprotein 4-beta-N-acetylglucosaminyltransferase activity;GO:0016740//transferase activity;GO:0016757//glycosyltransferase activity;GO:0042803//protein homodimerization activity;GO:0046872//metal ion binding	GO:0006486//protein glycosylation;GO:0006487//protein N-linked glycosylation;GO:0006491//N-glycan processing;GO:0046487//glyoxylate metabolic process	--
ENSMUSG00000026163	3.495	2.803	2.568	0.57	0.449	0.528	167	131	133	25	24	25	Sphkap	SPHK1 interactor, AKAP domain containing [Source:MGI Symbol;Acc:MGI:1924879]	-	-	-	-	-	GO:0051018//protein kinase A binding	-	--
ENSMUSG00000026202	49.724	47.213	46.424	4.317	4.819	5.015	681.8	632.26	672.5	52.93	68.69	66.3	Tuba4a	tubulin, alpha 4A [Source:MGI Symbol;Acc:MGI:1095410]	Human Diseases;Human Diseases;Human Diseases;Human Diseases;Human Diseases;Cellular Processes;Human Diseases;Human Diseases;Human Diseases;Cellular Processes;Cellular Processes;Cellular Processes	Neurodegenerative disease;Neurodegenerative disease;Neurodegenerative disease;Infectious disease: bacterial;Neurodegenerative disease;Transport and catabolism;Neurodegenerative disease;Neurodegenerative disease;Infectious disease: bacterial;Cellular community - eukaryotes;Cell growth and death;Cellular community - eukaryotes	ko05022//Pathways of neurodegeneration - multiple diseases;ko05010//Alzheimer disease;ko05014//Amyotrophic lateral sclerosis;ko05130//Pathogenic Escherichia coli infection;ko05016//Huntington disease;ko04145//Phagosome;ko05012//Parkinson disease;ko05020//Prion disease;ko05132//Salmonella infection;ko04530//Tight junction;ko04210//Apoptosis;ko04540//Gap junction	K07374;K07374;K07374;K07374;K07374;K07374;K07374;K07374;K07374;K07374;K07374;K07374	GO:0005737//cytoplasm;GO:0005856//cytoskeleton;GO:0005874//microtubule;GO:0015630//microtubule cytoskeleton	GO:0000166//nucleotide binding;GO:0005200//structural constituent of cytoskeleton;GO:0005515//protein binding;GO:0005525//GTP binding;GO:0016787//hydrolase activity;GO:0019899//enzyme binding;GO:0019901//protein kinase binding;GO:0046872//metal ion binding	GO:0000226//microtubule cytoskeleton organization;GO:0000278//mitotic cell cycle;GO:0007010//cytoskeleton organization;GO:0007017//microtubule-based process	--
ENSMUSG00000026226	2.063	3.106	2.881	0.493	0.895	1.25	13	21	20	3	6	7	Spata3	spermatogenesis associated 3 [Source:MGI Symbol;Acc:MGI:1917310]	-	-	-	-	GO:0005575//cellular_component;GO:0016020//membrane	GO:0003674//molecular_function	GO:0008150//biological_process	--
ENSMUSG00000026235	92.425	83.016	78.386	12.861	13.805	14.29	3656	3159	3299	559	604	532	Epha4	Eph receptor A4 [Source:MGI Symbol;Acc:MGI:98277]	Organismal Systems	Development and regeneration	ko04360//Axon guidance	K05105	GO:0005737//cytoplasm;GO:0005741//mitochondrial outer membrane;GO:0005768//endosome;GO:0005769//early endosome;GO:0005783//endoplasmic reticulum;GO:0005794//Golgi apparatus;GO:0005886//plasma membrane;GO:0005887//integral component of plasma membrane;GO:0005912//adherens junction;GO:0009986//cell surface;GO:0014069//postsynaptic density;GO:0016020//membrane;GO:0016021//integral component of membr…	GO:0000166//nucleotide binding;GO:0004672//protein kinase activity;GO:0004713//protein tyrosine kinase activity;GO:0004714//transmembrane receptor protein tyrosine kinase activity;GO:0005003//ephrin receptor activity;GO:0005004//GPI-linked ephrin receptor activity;GO:0005005//transmembrane-ephrin receptor activity;GO:0005515//protein binding;GO:0005524//ATP binding;GO:0016301//kinase activity;GO:…	GO:0006468//protein phosphorylation;GO:0007155//cell adhesion;GO:0007162//negative regulation of cell adhesion;GO:0007169//transmembrane receptor protein tyrosine kinase signaling pathway;GO:0007399//nervous system development;GO:0007411//axon guidance;GO:0007628//adult walking behavior;GO:0008045//motor neuron axon guidance;GO:0008284//positive regulation of cell population proliferation;GO:0008…	--
ENSMUSG00000026255	12.426	10.653	12.47	38.669	42.115	41.345	159	128	163	489	592	495	Efhd1	EF hand domain containing 1 [Source:MGI Symbol;Acc:MGI:1921607]	-	-	-	-	GO:0005739//mitochondrion;GO:0005743//mitochondrial inner membrane;GO:0016020//membrane	GO:0005509//calcium ion binding;GO:0046872//metal ion binding;GO:0061891//calcium ion sensor activity	GO:0031175//neuron projection development;GO:1900069//regulation of cellular hyperosmotic salinity response	--
ENSMUSG00000026259	5.19	5.586	4.816	2.275	2.481	2.732	98	97	92	43	52	43	Ngef	neuronal guanine nucleotide exchange factor [Source:MGI Symbol;Acc:MGI:1858414]	Organismal Systems	Development and regeneration	ko04360//Axon guidance	K07525	GO:0005737//cytoplasm;GO:0005829//cytosol;GO:0016020//membrane;GO:0030426//growth cone;GO:0042995//cell projection;GO:0098794//postsynapse;GO:0098978//glutamatergic synapse	GO:0005085//guanyl-nucleotide exchange factor activity;GO:0005515//protein binding;GO:0046875//ephrin receptor binding	GO:0007399//nervous system development;GO:0030154//cell differentiation;GO:0043087//regulation of GTPase activity;GO:0048013//ephrin receptor signaling pathway;GO:0061002//negative regulation of dendritic spine morphogenesis;GO:0090630//activation of GTPase activity;GO:1905806//regulation of synapse pruning	--
ENSMUSG00000026347	77.086	81.581	80.128	1.258	1.381	1.637	1424.13	1406.39	1517.54	23	28	29	Tmem163	transmembrane protein 163 [Source:MGI Symbol;Acc:MGI:1919410]	-	-	-	-	GO:0005768//endosome;GO:0005886//plasma membrane;GO:0016020//membrane;GO:0030672//synaptic vesicle membrane;GO:0031410//cytoplasmic vesicle;GO:0031901//early endosome membrane;GO:0045202//synapse;GO:0097708//intracellular vesicle	GO:0005515//protein binding;GO:0008270//zinc ion binding	GO:0099180//zinc ion import into synaptic vesicle	--
ENSMUSG00000026380	5.86	6.276	6.002	0.235	0.17	0.266	376	377	394	15	12	16	Tfcp2l1	transcription factor CP2-like 1 [Source:MGI Symbol;Acc:MGI:2444691]	-	-	-	-	GO:0005634//nucleus;GO:0005667//transcription regulator complex;GO:0005737//cytoplasm;GO:0016020//membrane	GO:0000977//RNA polymerase II transcription regulatory region sequence-specific DNA binding;GO:0000978//RNA polymerase II cis-regulatory region sequence-specific DNA binding;GO:0001227//DNA-binding transcription repressor activity, RNA polymerase II-specific;GO:0001228//DNA-binding transcription activator activity, RNA polymerase II-specific;GO:0003677//DNA binding;GO:0003700//DNA-binding transcr…	GO:0000122//negative regulation of transcription by RNA polymerase II;GO:0000902//cell morphogenesis;GO:0002070//epithelial cell maturation;GO:0006357//regulation of transcription by RNA polymerase II;GO:0007028//cytoplasm organization;GO:0007431//salivary gland development;GO:0008340//determination of adult lifespan;GO:0045927//positive regulation of growth;GO:0045944//positive regulation of tra…	CP2
ENSMUSG00000026398	0.031	0.281	0.087	1.429	0.89	1.321	1	2	2	35	30	26	Nr5a2	nuclear receptor subfamily 5, group A, member 2 [Source:MGI Symbol;Acc:MGI:1346834]	Human Diseases	Endocrine and metabolic disease	ko04950//Maturity onset diabetes of the young	K08027	GO:0005634//nucleus;GO:0005737//cytoplasm;GO:0005829//cytosol;GO:0090575//RNA polymerase II transcription regulator complex	GO:0000976//transcription cis-regulatory region binding;GO:0000978//RNA polymerase II cis-regulatory region sequence-specific DNA binding;GO:0001221//transcription coregulator binding;GO:0001228//DNA-binding transcription activator activity, RNA polymerase II-specific;GO:0003677//DNA binding;GO:0003682//chromatin binding;GO:0003690//double-stranded DNA binding;GO:0003700//DNA-binding transcriptio…	GO:0006351//transcription, DNA-templated;GO:0006355//regulation of transcription, DNA-templated;GO:0006357//regulation of transcription by RNA polymerase II;GO:0008206//bile acid metabolic process;GO:0009755//hormone-mediated signaling pathway;GO:0009888//tissue development;GO:0030522//intracellular receptor signaling pathway;GO:0042127//regulation of cell population proliferation;GO:0042632//cho…	SF-like
ENSMUSG00000026437	22.513	28.016	25.839	1.136	1.945	1.099	450	448	502	27	31	25	Cdk18	cyclin-dependent kinase 18 [Source:MGI Symbol;Acc:MGI:97518]	-	-	-	-	GO:0005634//nucleus;GO:0005737//cytoplasm	GO:0000166//nucleotide binding;GO:0004672//protein kinase activity;GO:0004674//protein serine/threonine kinase activity;GO:0004693//cyclin-dependent protein serine/threonine kinase activity;GO:0005524//ATP binding;GO:0016301//kinase activity;GO:0016740//transferase activity;GO:0106310//protein serine kinase activity	GO:0000083//regulation of transcription involved in G1/S transition of mitotic cell cycle;GO:0006468//protein phosphorylation;GO:0016310//phosphorylation;GO:0051726//regulation of cell cycle	--
ENSMUSG00000026456	4.491	4.841	4.389	73.408	77.098	75.343	59	53	61	917	1035	858	Cyb5r1	cytochrome b5 reductase 1 [Source:MGI Symbol;Acc:MGI:1919267]	Metabolism	Carbohydrate metabolism	ko00520//Amino sugar and nucleotide sugar metabolism	K00326	GO:0005739//mitochondrion;GO:0016020//membrane	GO:0004128//cytochrome-b5 reductase activity, acting on NAD(P)H;GO:0016491//oxidoreductase activity;GO:0071949//FAD binding	GO:0006629//lipid metabolic process;GO:0006694//steroid biosynthetic process;GO:0008202//steroid metabolic process;GO:0016126//sterol biosynthetic process	--
ENSMUSG00000026458	0.093	0.033	0.047	0.474	0.446	0.325	3	1	2	19	18	12	Ppfia4	protein tyrosine phosphatase, receptor type, f polypeptide (PTPRF), interacting protein (liprin), alpha 4 [Source:MGI Symbol;Acc:MGI:1915757]	-	-	-	-	GO:0005737//cytoplasm;GO:0045202//synapse;GO:0048786//presynaptic active zone;GO:0098688//parallel fiber to Purkinje cell synapse;GO:0098793//presynapse;GO:0098978//glutamatergic synapse	GO:0005515//protein binding	GO:0050808//synapse organization	--
ENSMUSG00000026483	0.995	0.746	1.11	4.828	4.554	4.377	45	28	42	217	227	179	Niban1	niban apoptosis regulator 1 [Source:MGI Symbol;Acc:MGI:2137237]	-	-	-	-	GO:0005737//cytoplasm;GO:0005829//cytosol;GO:0005886//plasma membrane;GO:0016020//membrane	GO:0003674//molecular_function	GO:0001933//negative regulation of protein phosphorylation;GO:0001934//positive regulation of protein phosphorylation;GO:0006417//regulation of translation;GO:0034976//response to endoplasmic reticulum stress;GO:0045727//positive regulation of translation	--
ENSMUSG00000026494	1.05	1.111	0.811	0.486	0.388	0.437	95	99	79	46	40	39	Kif26b	kinesin family member 26B [Source:MGI Symbol;Acc:MGI:2447076]	-	-	-	-	GO:0005737//cytoplasm;GO:0005856//cytoskeleton;GO:0005871//kinesin complex;GO:0005874//microtubule	GO:0000166//nucleotide binding;GO:0003774//cytoskeletal motor activity;GO:0003777//microtubule motor activity;GO:0005515//protein binding;GO:0005524//ATP binding;GO:0008017//microtubule binding	GO:0007018//microtubule-based movement;GO:0022409//positive regulation of cell-cell adhesion;GO:0030010//establishment of cell polarity;GO:0072092//ureteric bud invasion	--
ENSMUSG00000026586	11.645	14.184	12.738	34.637	36.668	35.817	429	483	481	1233	1467	1213	Prrx1	paired related homeobox 1 [Source:MGI Symbol;Acc:MGI:97712]	-	-	-	-	GO:0005634//nucleus;GO:0005654//nucleoplasm;GO:0005829//cytosol	GO:0000978//RNA polymerase II cis-regulatory region sequence-specific DNA binding;GO:0000981//DNA-binding transcription factor activity, RNA polymerase II-specific;GO:0001227//DNA-binding transcription repressor activity, RNA polymerase II-specific;GO:0001228//DNA-binding transcription activator activity, RNA polymerase II-specific;GO:0003677//DNA binding;GO:0016251//RNA polymerase II general tra…	GO:0000122//negative regulation of transcription by RNA polymerase II;GO:0002053//positive regulation of mesenchymal cell proliferation;GO:0006355//regulation of transcription, DNA-templated;GO:0006357//regulation of transcription by RNA polymerase II;GO:0006366//transcription by RNA polymerase II;GO:0007224//smoothened signaling pathway;GO:0010463//mesenchymal cell proliferation;GO:0030326//embr…	Homeobox
ENSMUSG00000026610	0.859	1.283	0.88	2.416	2.158	2.008	30	44	33	82	84	66	Esrrg	estrogen-related receptor gamma [Source:MGI Symbol;Acc:MGI:1347056]	-	-	-	-	GO:0005634//nucleus	GO:0000977//RNA polymerase II transcription regulatory region sequence-specific DNA binding;GO:0000978//RNA polymerase II cis-regulatory region sequence-specific DNA binding;GO:0001228//DNA-binding transcription activator activity, RNA polymerase II-specific;GO:0003677//DNA binding;GO:0003700//DNA-binding transcription factor activity;GO:0003707//steroid hormone receptor activity;GO:0004879//nucl…	GO:0006355//regulation of transcription, DNA-templated;GO:0006357//regulation of transcription by RNA polymerase II;GO:0043401//steroid hormone mediated signaling pathway;GO:0045893//positive regulation of transcription, DNA-templated;GO:0045944//positive regulation of transcription by RNA polymerase II;GO:0048384//retinoic acid receptor signaling pathway;GO:0120162//positive regulation of cold-i…	ESR-like
ENSMUSG00000026628	4.078	2.955	3.416	32.223	33.948	34.52	56	38	48	440	514	445	Atf3	activating transcription factor 3 [Source:MGI Symbol;Acc:MGI:109384]	-	-	-	-	GO:0005634//nucleus;GO:0005654//nucleoplasm;GO:0005730//nucleolus;GO:0090575//RNA polymerase II transcription regulator complex;GO:1990622//CHOP-ATF3 complex	GO:0000976//transcription cis-regulatory region binding;GO:0000977//RNA polymerase II transcription regulatory region sequence-specific DNA binding;GO:0000978//RNA polymerase II cis-regulatory region sequence-specific DNA binding;GO:0000981//DNA-binding transcription factor activity, RNA polymerase II-specific;GO:0001227//DNA-binding transcription repressor activity, RNA polymerase II-specific;GO…	GO:0000122//negative regulation of transcription by RNA polymerase II;GO:0006094//gluconeogenesis;GO:0006355//regulation of transcription, DNA-templated;GO:0006357//regulation of transcription by RNA polymerase II;GO:0008284//positive regulation of cell population proliferation;GO:0010033//response to organic substance;GO:0010628//positive regulation of gene expression;GO:0030968//endoplasmic ret…	TF_bZIP
ENSMUSG00000026650	6.262	5.691	5.858	3.178	1.766	2.374	26	22	25	12	7	9	Meig1	meiosis expressed gene 1 [Source:MGI Symbol;Acc:MGI:1202878]	-	-	-	-	GO:0002177//manchette;GO:0005634//nucleus;GO:0005829//cytosol	GO:0005515//protein binding	GO:0007283//spermatogenesis;GO:0007288//sperm axoneme assembly;GO:0008104//protein localization;GO:0030154//cell differentiation;GO:0051321//meiotic cell cycle;GO:1905198//manchette assembly	--
ENSMUSG00000026676	13.365	16.124	16.87	3.972	3.435	3.113	247	279	319	73	70	54	Ccdc3	coiled-coil domain containing 3 [Source:MGI Symbol;Acc:MGI:1921436]	-	-	-	-	GO:0005576//extracellular region;GO:0005783//endoplasmic reticulum	GO:0003674//molecular_function	GO:0008610//lipid biosynthetic process;GO:0010629//negative regulation of gene expression;GO:0010804//negative regulation of tumor necrosis factor-mediated signaling pathway;GO:0045600//positive regulation of fat cell differentiation;GO:0045833//negative regulation of lipid metabolic process;GO:0046889//positive regulation of lipid biosynthetic process;GO:0051055//negative regulation of lipid bio…	--
ENSMUSG00000026686	1.584	1.153	1.645	0.091	0.041	0.289	36	25	39	2	1	6	Lmx1a	LIM homeobox transcription factor 1 alpha [Source:MGI Symbol;Acc:MGI:1888519]	-	-	-	-	GO:0005634//nucleus	GO:0000977//RNA polymerase II transcription regulatory region sequence-specific DNA binding;GO:0000981//DNA-binding transcription factor activity, RNA polymerase II-specific;GO:0001228//DNA-binding transcription activator activity, RNA polymerase II-specific;GO:0003677//DNA binding;GO:0046872//metal ion binding;GO:1990837//sequence-specific double-stranded DNA binding	GO:0001558//regulation of cell growth;GO:0006355//regulation of transcription, DNA-templated;GO:0006357//regulation of transcription by RNA polymerase II;GO:0007411//axon guidance;GO:0007417//central nervous system development;GO:0007420//brain development;GO:0007613//memory;GO:0007626//locomotory behavior;GO:0010468//regulation of gene expression;GO:0021542//dentate gyrus development;GO:0021549/…	Homeobox
ENSMUSG00000026787	2.339	1.961	1.672	0.506	0.411	0.777	93	73	68	20	18	29	Gad2	glutamic acid decarboxylase 2 [Source:MGI Symbol;Acc:MGI:95634]	Metabolism;Organismal Systems;Human Diseases;Metabolism;Metabolism;Metabolism;Metabolism	Global and overview maps;Nervous system;Endocrine and metabolic disease;Amino acid metabolism;Metabolism of other amino acids;Carbohydrate metabolism;Metabolism of other amino acids	ko01100//Metabolic pathways;ko04727//GABAergic synapse;ko04940//Type I diabetes mellitus;ko00250//Alanine, aspartate and glutamate metabolism;ko00410//beta-Alanine metabolism;ko00650//Butanoate metabolism;ko00430//Taurine and hypotaurine metabolism	K01580;K01580;K01580;K01580;K01580;K01580;K01580	GO:0000139//Golgi membrane;GO:0005737//cytoplasm;GO:0005794//Golgi apparatus;GO:0005829//cytosol;GO:0005886//plasma membrane;GO:0016020//membrane;GO:0030424//axon;GO:0030672//synaptic vesicle membrane;GO:0031410//cytoplasmic vesicle;GO:0042734//presynaptic membrane;GO:0042995//cell projection;GO:0045202//synapse;GO:0048471//perinuclear region of cytoplasm;GO:0060077//inhibitory synapse;GO:0061202…	GO:0003824//catalytic activity;GO:0004351//glutamate decarboxylase activity;GO:0016595//glutamate binding;GO:0016829//lyase activity;GO:0016830//carbon-carbon lyase activity;GO:0016831//carboxy-lyase activity;GO:0030170//pyridoxal phosphate binding;GO:0044877//protein-containing complex binding	GO:0006540//glutamate decarboxylation to succinate;GO:0009410//response to xenobiotic stimulus;GO:0009449//gamma-aminobutyric acid biosynthetic process;GO:0019752//carboxylic acid metabolic process;GO:0042136//neurotransmitter biosynthetic process	--
ENSMUSG00000026824	2.099	1.716	2.426	0.289	0.254	0.265	58	58	70	8	9	7	Kcnj3	potassium inwardly-rectifying channel, subfamily J, member 3 [Source:MGI Symbol;Acc:MGI:104742]	Organismal Systems;Organismal Systems;Organismal Systems;Organismal Systems;Organismal Systems;Organismal Systems;Organismal Systems;Organismal Systems;Human Diseases;Organismal Systems	Endocrine system;Nervous system;Nervous system;Endocrine system;Nervous system;Nervous system;Nervous system;Environmental adaptation;Substance dependence;Endocrine system	ko04921//Oxytocin signaling pathway;ko04723//Retrograde endocannabinoid signaling;ko04726//Serotonergic synapse;ko04915//Estrogen signaling pathway;ko04728//Dopaminergic synapse;ko04724//Glutamatergic synapse;ko04725//Cholinergic synapse;ko04713//Circadian entrainment;ko05032//Morphine addiction;ko04929//GnRH secretion	K04997;K04997;K04997;K04997;K04997;K04997;K04997;K04997;K04997;K04997	GO:0005886//plasma membrane;GO:0008076//voltage-gated potassium channel complex;GO:0009897//external side of plasma membrane;GO:0009986//cell surface;GO:0016020//membrane;GO:0016021//integral component of membrane;GO:0030315//T-tubule;GO:0042734//presynaptic membrane;GO:0098688//parallel fiber to Purkinje cell synapse	GO:0005242//inward rectifier potassium channel activity;GO:0005244//voltage-gated ion channel activity;GO:0015467//G-protein activated inward rectifier potassium channel activity;GO:0099508//voltage-gated ion channel activity involved in regulation of presynaptic membrane potential	GO:0006811//ion transport;GO:0006813//potassium ion transport;GO:0034220//ion transmembrane transport;GO:0034765//regulation of ion transmembrane transport;GO:0051602//response to electrical stimulus;GO:0071805//potassium ion transmembrane transport;GO:0099505//regulation of presynaptic membrane potential;GO:1990573//potassium ion import across plasma membrane	--
ENSMUSG00000026922	0.485	0.829	0.569	1.854	2.376	2.791	5	8	6	19	27	27	Agpat2	1-acylglycerol-3-phosphate O-acyltransferase 2 (lysophosphatidic acid acyltransferase, beta) [Source:MGI Symbol;Acc:MGI:1914762]	Metabolism;Environmental Information Processing;Metabolism;Metabolism;Organismal Systems	Global and overview maps;Signal transduction;Lipid metabolism;Lipid metabolism;Digestive system	ko01100//Metabolic pathways;ko04072//Phospholipase D signaling pathway;ko00564//Glycerophospholipid metabolism;ko00561//Glycerolipid metabolism;ko04975//Fat digestion and absorption	K13509;K13509;K13509;K13509;K13509	GO:0005783//endoplasmic reticulum;GO:0005789//endoplasmic reticulum membrane;GO:0016020//membrane	GO:0003841//1-acylglycerol-3-phosphate O-acyltransferase activity;GO:0016740//transferase activity;GO:0016746//acyltransferase activity	GO:0001819//positive regulation of cytokine production;GO:0006629//lipid metabolic process;GO:0006654//phosphatidic acid biosynthetic process;GO:0008544//epidermis development;GO:0008654//phospholipid biosynthetic process;GO:0009410//response to xenobiotic stimulus;GO:0016024//CDP-diacylglycerol biosynthetic process	--
ENSMUSG00000026932	103.958	103.983	104.217	37.954	37.008	37.327	4605	4351	4720	1673	1810	1555	Nacc2	nucleus accumbens associated 2, BEN and BTB (POZ) domain containing [Source:MGI Symbol;Acc:MGI:1915241]	-	-	-	-	GO:0000785//chromatin;GO:0005634//nucleus;GO:0005730//nucleolus;GO:0005739//mitochondrion	GO:0000978//RNA polymerase II cis-regulatory region sequence-specific DNA binding;GO:0000981//DNA-binding transcription factor activity, RNA polymerase II-specific;GO:0001227//DNA-binding transcription repressor activity, RNA polymerase II-specific;GO:0003677//DNA binding;GO:0005515//protein binding;GO:0042803//protein homodimerization activity;GO:0042826//histone deacetylase binding;GO:0044877//…	GO:0000122//negative regulation of transcription by RNA polymerase II;GO:0006357//regulation of transcription by RNA polymerase II;GO:0008285//negative regulation of cell population proliferation;GO:0031503//protein-containing complex localization;GO:0045892//negative regulation of transcription, DNA-templated;GO:0051260//protein homooligomerization;GO:1900477//negative regulation of G1/S transit…	--
ENSMUSG00000026941	0.86	1.471	0.991	2.112	2.923	1.774	22	36	28	58	89	46	Mamdc4	MAM domain containing 4 [Source:MGI Symbol;Acc:MGI:2685841]	-	-	-	-	GO:0005768//endosome;GO:0005794//Golgi apparatus;GO:0016020//membrane	GO:0003674//molecular_function;GO:0005515//protein binding	GO:0008150//biological_process;GO:0015031//protein transport	--
ENSMUSG00000026959	6.648	6.595	7.042	2.293	2.728	2.754	182	173	200	64	82	73	Grin1	glutamate receptor, ionotropic, NMDA1 (zeta 1) [Source:MGI Symbol;Acc:MGI:95819]	Human Diseases;Human Diseases;Environmental Information Processing;Human Diseases;Environmental Information Processing;Human Diseases;Human Diseases;Environmental Information Processing;Environmental Information Processing;Environmental Information Processing;Human Diseases;Human Diseases;Organismal Systems;Organismal Systems;Human Diseases;Organismal Systems;Human Diseases;Human Diseases	Neurodegenerative disease;Neurodegenerative disease;Signaling molecules and interaction;Neurodegenerative disease;Signal transduction;Neurodegenerative disease;Neurodegenerative disease;Signal transduction;Signal transduction;Signal transduction;Substance dependence;Neurodegenerative disease;Nervous system;Environmental adaptation;Substance dependence;Nervous system;Substance dependence;Substance…	ko05022//Pathways of neurodegeneration - multiple diseases;ko05010//Alzheimer disease;ko04080//Neuroactive ligand-receptor interaction;ko05014//Amyotrophic lateral sclerosis;ko04020//Calcium signaling pathway;ko05016//Huntington disease;ko05020//Prion disease;ko04014//Ras signaling pathway;ko04015//Rap1 signaling pathway;ko04024//cAMP signaling pathway;ko05034//Alcoholism;ko05017//Spinocerebellar…	K05208;K05208;K05208;K05208;K05208;K05208;K05208;K05208;K05208;K05208;K05208;K05208;K05208;K05208;K05208;K05208;K05208;K05208	GO:0005737//cytoplasm;GO:0005783//endoplasmic reticulum;GO:0005789//endoplasmic reticulum membrane;GO:0005886//plasma membrane;GO:0008021//synaptic vesicle;GO:0009986//cell surface;GO:0014069//postsynaptic density;GO:0016020//membrane;GO:0017146//NMDA selective glutamate receptor complex;GO:0030425//dendrite;GO:0030426//growth cone;GO:0030658//transport vesicle membrane;GO:0030672//synaptic vesic…	GO:0001540//amyloid-beta binding;GO:0004970//ionotropic glutamate receptor activity;GO:0004972//NMDA glutamate receptor activity;GO:0005102//signaling receptor binding;GO:0005216//ion channel activity;GO:0005261//cation channel activity;GO:0005262//calcium channel activity;GO:0005509//calcium ion binding;GO:0005515//protein binding;GO:0005516//calmodulin binding;GO:0015276//ligand-gated ion chann…	GO:0001661//conditioned taste aversion;GO:0001964//startle response;GO:0001967//suckling behavior;GO:0001975//response to amphetamine;GO:0006366//transcription by RNA polymerase II;GO:0006811//ion transport;GO:0006812//cation transport;GO:0006816//calcium ion transport;GO:0006874//cellular calcium ion homeostasis;GO:0007268//chemical synaptic transmission;GO:0007611//learning or memory;GO:0007612…	--
ENSMUSG00000026994	0.558	0.635	0.509	0.037	0.236	0.317	15	16	14	1	7	8	Galnt3	polypeptide N-acetylgalactosaminyltransferase 3 [Source:MGI Symbol;Acc:MGI:894695]	Metabolism;Metabolism;Metabolism	Global and overview maps;Glycan biosynthesis and metabolism;Glycan biosynthesis and metabolism	ko01100//Metabolic pathways;ko00514//Other types of O-glycan biosynthesis;ko00512//Mucin type O-glycan biosynthesis	K00710;K00710;K00710	GO:0005794//Golgi apparatus;GO:0016020//membrane;GO:0032580//Golgi cisterna membrane;GO:0048471//perinuclear region of cytoplasm	GO:0004653//polypeptide N-acetylgalactosaminyltransferase activity;GO:0005509//calcium ion binding;GO:0016740//transferase activity;GO:0016757//glycosyltransferase activity;GO:0030145//manganese ion binding;GO:0030246//carbohydrate binding;GO:0046872//metal ion binding	GO:0006486//protein glycosylation;GO:0006493//protein O-linked glycosylation;GO:0007283//spermatogenesis;GO:0018242//protein O-linked glycosylation via serine;GO:0018243//protein O-linked glycosylation via threonine	--
ENSMUSG00000027070	14.503	13.903	13.563	3.167	3.526	3.405	1552	1393	1485	337	416	342	Lrp2	low density lipoprotein receptor-related protein 2 [Source:MGI Symbol;Acc:MGI:95794]	Organismal Systems;Environmental Information Processing;Organismal Systems	Endocrine system;Signal transduction;Digestive system	ko04918//Thyroid hormone synthesis;ko04340//Hedgehog signaling pathway;ko04979//Cholesterol metabolism	K06233;K06233;K06233	GO:0005615//extracellular space;GO:0005737//cytoplasm;GO:0005768//endosome;GO:0005783//endoplasmic reticulum;GO:0005794//Golgi apparatus;GO:0005886//plasma membrane;GO:0005903//brush border;GO:0005905//clathrin-coated pit;GO:0009897//external side of plasma membrane;GO:0009986//cell surface;GO:0016020//membrane;GO:0016324//apical plasma membrane;GO:0030139//endocytic vesicle;GO:0030424//axon;GO:0…	GO:0005509//calcium ion binding;GO:0005515//protein binding;GO:0016922//nuclear receptor binding;GO:0017124//SH3 domain binding;GO:0030165//PDZ domain binding;GO:0030492//hemoglobin binding;GO:0031994//insulin-like growth factor I binding;GO:0038024//cargo receptor activity;GO:0042562//hormone binding;GO:0044877//protein-containing complex binding;GO:0046872//metal ion binding;GO:0050750//low-den…	GO:0001822//kidney development;GO:0001843//neural tube closure;GO:0003139//secondary heart field specification;GO:0003148//outflow tract septum morphogenesis;GO:0003223//ventricular compact myocardium morphogenesis;GO:0003281//ventricular septum development;GO:0006897//endocytosis;GO:0006898//receptor-mediated endocytosis;GO:0007399//nervous system development;GO:0007507//heart development;GO:000…	--
ENSMUSG00000027075	0.702	0.599	0.686	3.74	2.741	3.117	15	12	15	74	59	61	Slc43a1	solute carrier family 43, member 1 [Source:MGI Symbol;Acc:MGI:1931352]	-	-	-	-	GO:0005783//endoplasmic reticulum;GO:0005789//endoplasmic reticulum membrane;GO:0005886//plasma membrane;GO:0016020//membrane;GO:0016324//apical plasma membrane;GO:0098846//podocyte foot	GO:0005304//L-valine transmembrane transporter activity;GO:0015175//neutral amino acid transmembrane transporter activity;GO:0015179//L-amino acid transmembrane transporter activity;GO:0015188//L-isoleucine transmembrane transporter activity;GO:0015190//L-leucine transmembrane transporter activity;GO:0022857//transmembrane transporter activity	GO:0006865//amino acid transport;GO:0015804//neutral amino acid transport;GO:0015807//L-amino acid transport;GO:0015818//isoleucine transport;GO:0015820//leucine transport;GO:0051956//negative regulation of amino acid transport;GO:0055085//transmembrane transport;GO:0060358//negative regulation of leucine import;GO:1903785//L-valine transmembrane transport	--
ENSMUSG00000027215	19.095	19.62	16.698	3.648	3.04	2.598	233	228	215	43	41	30	Cd82	CD82 antigen [Source:MGI Symbol;Acc:MGI:104651]	Cellular Processes	Cell growth and death	ko04115//p53 signaling pathway	K06509	GO:0005886//plasma membrane;GO:0016020//membrane;GO:0016021//integral component of membrane	-	-	--
ENSMUSG00000027217	47.233	47.497	51.355	14.132	12.855	14.484	1195	1092	1307	358	368	353	Tspan18	tetraspanin 18 [Source:MGI Symbol;Acc:MGI:1917186]	-	-	-	-	GO:0005886//plasma membrane;GO:0016020//membrane;GO:0016021//integral component of membrane	GO:0003674//molecular_function	-	--
ENSMUSG00000027221	5.283	3.742	3.846	0.651	0.831	0.574	98	65	73	12	17	10	Chst1	carbohydrate sulfotransferase 1 [Source:MGI Symbol;Acc:MGI:1924219]	Metabolism	Glycan biosynthesis and metabolism	ko00533//Glycosaminoglycan biosynthesis - keratan sulfate	K01022	GO:0000139//Golgi membrane;GO:0005794//Golgi apparatus;GO:0005802//trans-Golgi network;GO:0016020//membrane	GO:0001517//N-acetylglucosamine 6-O-sulfotransferase activity;GO:0008146//sulfotransferase activity;GO:0016740//transferase activity;GO:0045130//keratan sulfotransferase activity	GO:0005975//carbohydrate metabolic process;GO:0006012//galactose metabolic process;GO:0006044//N-acetylglucosamine metabolic process;GO:0006790//sulfur compound metabolic process;GO:0006954//inflammatory response;GO:0018146//keratan sulfate biosynthetic process;GO:0042339//keratan sulfate metabolic process	--
ENSMUSG00000027238	42.722	47.394	42.739	5.319	5.446	4.636	932	950	949	112	125	93	Frmd5	FERM domain containing 5 [Source:MGI Symbol;Acc:MGI:2442557]	-	-	-	-	GO:0005856//cytoskeleton;GO:0005912//adherens junction;GO:0016020//membrane;GO:0070161//anchoring junction	GO:0005178//integrin binding;GO:0008092//cytoskeletal protein binding;GO:0019901//protein kinase binding	GO:0030334//regulation of cell migration;GO:0031032//actomyosin structure organization;GO:0045785//positive regulation of cell adhesion;GO:2000146//negative regulation of cell motility	--
ENSMUSG00000027246	1.738	1.397	1.268	0.26	0.704	0.368	21	16	19	3	9	4	Ell3	elongation factor RNA polymerase II-like 3 [Source:MGI Symbol;Acc:MGI:2673679]	-	-	-	-	GO:0005634//nucleus;GO:0005654//nucleoplasm;GO:0005694//chromosome;GO:0005730//nucleolus;GO:0005829//cytosol;GO:0008023//transcription elongation factor complex;GO:0016607//nuclear speck;GO:0030054//cell junction	GO:0000987//cis-regulatory region sequence-specific DNA binding;GO:0005515//protein binding	GO:0006354//DNA-templated transcription, elongation;GO:0006366//transcription by RNA polymerase II;GO:0006368//transcription elongation from RNA polymerase II promoter;GO:0010717//regulation of epithelial to mesenchymal transition;GO:0032786//positive regulation of DNA-templated transcription, elongation;GO:0032968//positive regulation of transcription elongation from RNA polymerase II promoter;G…	--
ENSMUSG00000027273	20.97	17.591	17.932	7.667	6.693	5.569	250	197	216	89	90	69	Snap25	synaptosomal-associated protein 25 [Source:MGI Symbol;Acc:MGI:98331]	Organismal Systems;Organismal Systems	Endocrine system;Nervous system	ko04911//Insulin secretion;ko04721//Synaptic vesicle cycle	K18211;K18211	GO:0001917//photoreceptor inner segment;GO:0005737//cytoplasm;GO:0005768//endosome;GO:0005802//trans-Golgi network;GO:0005829//cytosol;GO:0005856//cytoskeleton;GO:0005886//plasma membrane;GO:0008021//synaptic vesicle;GO:0008076//voltage-gated potassium channel complex;GO:0015629//actin cytoskeleton;GO:0016020//membrane;GO:0030027//lamellipodium;GO:0030175//filopodium;GO:0030424//axon;GO:0030426//…	GO:0000149//SNARE binding;GO:0005249//voltage-gated potassium channel activity;GO:0005484//SNAP receptor activity;GO:0005515//protein binding;GO:0008289//lipid binding;GO:0017022//myosin binding;GO:0017075//syntaxin-1 binding;GO:0019904//protein domain specific binding;GO:0019905//syntaxin binding;GO:0044325//transmembrane transporter binding;GO:0047485//protein N-terminus binding;GO:0048306//cal…	GO:0006887//exocytosis;GO:0006906//vesicle fusion;GO:0007269//neurotransmitter secretion;GO:0007616//long-term memory;GO:0007626//locomotory behavior;GO:0008306//associative learning;GO:0010975//regulation of neuron projection development;GO:0016079//synaptic vesicle exocytosis;GO:0016082//synaptic vesicle priming;GO:0016197//endosomal transport;GO:0030073//insulin secretion;GO:0030431//sleep;GO:…	--
ENSMUSG00000027296	0.159	0.085	0.078	0.719	0.577	0.593	2	1	1	9	8	7	Itpka	inositol 1,4,5-trisphosphate 3-kinase A [Source:MGI Symbol;Acc:MGI:1333822]	Metabolism;Environmental Information Processing;Environmental Information Processing;Metabolism	Global and overview maps;Signal transduction;Signal transduction;Carbohydrate metabolism	ko01100//Metabolic pathways;ko04020//Calcium signaling pathway;ko04070//Phosphatidylinositol signaling system;ko00562//Inositol phosphate metabolism	K00911;K00911;K00911;K00911	GO:0005634//nucleus;GO:0005737//cytoplasm;GO:0005856//cytoskeleton;GO:0043197//dendritic spine;GO:0098871//postsynaptic actin cytoskeleton;GO:0098978//glutamatergic synapse	GO:0000166//nucleotide binding;GO:0000828//inositol hexakisphosphate kinase activity;GO:0004683//calmodulin-dependent protein kinase activity;GO:0005516//calmodulin binding;GO:0005524//ATP binding;GO:0008440//inositol-1,4,5-trisphosphate 3-kinase activity;GO:0016301//kinase activity;GO:0016740//transferase activity;GO:0031267//small GTPase binding	GO:0006020//inositol metabolic process;GO:0016310//phosphorylation;GO:0030036//actin cytoskeleton organization;GO:0032958//inositol phosphate biosynthetic process;GO:0046854//phosphatidylinositol phosphate biosynthetic process;GO:0048167//regulation of synaptic plasticity;GO:0051592//response to calcium ion;GO:0061003//positive regulation of dendritic spine morphogenesis;GO:0071277//cellular resp…	--
ENSMUSG00000027313	0.971	1.32	1.035	34.171	29.137	27.453	11	14	12	385	364	292	Chac1	ChaC, cation transport regulator 1 [Source:MGI Symbol;Acc:MGI:1916315]	Metabolism;Metabolism	Global and overview maps;Metabolism of other amino acids	ko01100//Metabolic pathways;ko00480//Glutathione metabolism	K07232;K07232	GO:0005737//cytoplasm;GO:0005794//Golgi apparatus;GO:0005802//trans-Golgi network;GO:0005829//cytosol	GO:0003839//gamma-glutamylcyclotransferase activity;GO:0005112//Notch binding;GO:0016829//lyase activity;GO:0061928//glutathione specific gamma-glutamylcyclotransferase activity	GO:0006751//glutathione catabolic process;GO:0006915//apoptotic process;GO:0006986//response to unfolded protein;GO:0007219//Notch signaling pathway;GO:0007399//nervous system development;GO:0010955//negative regulation of protein processing;GO:0022008//neurogenesis;GO:0045746//negative regulation of Notch signaling pathway;GO:0070059//intrinsic apoptotic signaling pathway in response to endoplas…	--
ENSMUSG00000027314	0.617	0.165	0.301	1.163	0.839	0.739	16	4	8	30	24	18	Dll4	delta like canonical Notch ligand 4 [Source:MGI Symbol;Acc:MGI:1859388]	Human Diseases;Human Diseases;Human Diseases;Human Diseases;Organismal Systems;Environmental Information Processing	Cancer: overview;Cancer: overview;Cancer: specific types;Drug resistance: antineoplastic;Immune system;Signal transduction	ko05200//Pathways in cancer;ko05207//Chemical carcinogenesis - receptor activation;ko05224//Breast cancer;ko01522//Endocrine resistance;ko04658//Th1 and Th2 cell differentiation;ko04330//Notch signaling pathway	K06051;K06051;K06051;K06051;K06051;K06051	GO:0005886//plasma membrane;GO:0016020//membrane;GO:0016021//integral component of membrane	GO:0005112//Notch binding;GO:0005509//calcium ion binding;GO:0005515//protein binding;GO:0048018//receptor ligand activity	GO:0000122//negative regulation of transcription by RNA polymerase II;GO:0001525//angiogenesis;GO:0001569//branching involved in blood vessel morphogenesis;GO:0001974//blood vessel remodeling;GO:0003180//aortic valve morphogenesis;GO:0003208//cardiac ventricle morphogenesis;GO:0003209//cardiac atrium morphogenesis;GO:0003222//ventricular trabecula myocardium morphogenesis;GO:0003344//pericardium …	--
ENSMUSG00000027375	10.401	9.332	9.098	1.124	1.462	0.886	200	168	179	16	31	16	Mal	myelin and lymphocyte protein, T cell differentiation protein [Source:MGI Symbol;Acc:MGI:892970]	-	-	-	-	GO:0000139//Golgi membrane;GO:0005783//endoplasmic reticulum;GO:0005794//Golgi apparatus;GO:0005886//plasma membrane;GO:0016020//membrane;GO:0016324//apical plasma membrane;GO:0043220//Schmidt-Lanterman incisure;GO:0044853//plasma membrane raft;GO:0045121//membrane raft;GO:0110165//cellular anatomical entity;GO:0120003//hinge region between urothelial plaques of apical plasma membrane	GO:0019911//structural constituent of myelin sheath	GO:0002175//protein localization to paranode region of axon;GO:0022010//central nervous system myelination;GO:0042552//myelination;GO:0098737//protein insertion into plasma membrane;GO:1902043//positive regulation of extrinsic apoptotic signaling pathway via death domain receptors	--
ENSMUSG00000027419	5.842	5.554	4.156	1.138	0.916	0.978	191	170	139	37	33	30	Pcsk2	proprotein convertase subtilisin/kexin type 2 [Source:MGI Symbol;Acc:MGI:97512]	-	-	-	-	GO:0005576//extracellular region;GO:0005615//extracellular space;GO:0005654//nucleoplasm;GO:0005788//endoplasmic reticulum lumen;GO:0016020//membrane;GO:0030133//transport vesicle;GO:0030141//secretory granule;GO:0030425//dendrite;GO:0031410//cytoplasmic vesicle;GO:0034774//secretory granule lumen;GO:0043005//neuron projection;GO:0043025//neuronal cell body;GO:0043204//perikaryon;GO:0043231//intr…	GO:0004175//endopeptidase activity;GO:0004252//serine-type endopeptidase activity;GO:0008233//peptidase activity;GO:0008236//serine-type peptidase activity;GO:0016787//hydrolase activity	GO:0006508//proteolysis;GO:0007399//nervous system development;GO:0016485//protein processing;GO:0016486//peptide hormone processing;GO:0016540//protein autoprocessing;GO:0030070//insulin processing;GO:0034230//enkephalin processing;GO:0034231//islet amyloid polypeptide processing	--
ENSMUSG00000027434	45.992	50.88	48.72	17.484	20.587	22.127	633	668	655	240	314	283	Nkx2-2	NK2 homeobox 2 [Source:MGI Symbol;Acc:MGI:97347]	Human Diseases	Endocrine and metabolic disease	ko04950//Maturity onset diabetes of the young	K08029	GO:0005634//nucleus	GO:0000978//RNA polymerase II cis-regulatory region sequence-specific DNA binding;GO:0000981//DNA-binding transcription factor activity, RNA polymerase II-specific;GO:0000987//cis-regulatory region sequence-specific DNA binding;GO:0001228//DNA-binding transcription activator activity, RNA polymerase II-specific;GO:0003677//DNA binding;GO:0003700//DNA-binding transcription factor activity;GO:00055…	GO:0003309//type B pancreatic cell differentiation;GO:0003323//type B pancreatic cell development;GO:0003326//pancreatic A cell fate commitment;GO:0003327//type B pancreatic cell fate commitment;GO:0003329//pancreatic PP cell fate commitment;GO:0006355//regulation of transcription, DNA-templated;GO:0006357//regulation of transcription by RNA polymerase II;GO:0007224//smoothened signaling pathway;…	Homeobox
ENSMUSG00000027488	46.574	51.701	49.297	7.023	6.825	8.017	687	714	744	103	111	111	Snta1	syntrophin, acidic 1 [Source:MGI Symbol;Acc:MGI:101772]	-	-	-	-	GO:0005737//cytoplasm;GO:0005856//cytoskeleton;GO:0005886//plasma membrane;GO:0016010//dystrophin-associated glycoprotein complex;GO:0016020//membrane;GO:0031594//neuromuscular junction;GO:0032991//protein-containing complex;GO:0042383//sarcolemma;GO:0045202//synapse;GO:0045211//postsynaptic membrane;GO:0070161//anchoring junction	GO:0003779//actin binding;GO:0005198//structural molecule activity;GO:0005515//protein binding;GO:0005516//calmodulin binding;GO:0017080//sodium channel regulator activity;GO:0030165//PDZ domain binding;GO:0044325//transmembrane transporter binding;GO:0050998//nitric-oxide synthase binding;GO:0051117//ATPase binding	GO:0002027//regulation of heart rate;GO:0003117//regulation of vasoconstriction by circulating norepinephrine;GO:0007528//neuromuscular junction development;GO:0060307//regulation of ventricular cardiac muscle cell membrane repolarization;GO:0086005//ventricular cardiac muscle cell action potential;GO:1902083//negative regulation of peptidyl-cysteine S-nitrosylation;GO:1902305//regulation of sodi…	--
ENSMUSG00000027500	8.92	8.858	7.969	0.14	0.253	0.668	128	119	117	2	4	9	Stmn2	stathmin-like 2 [Source:MGI Symbol;Acc:MGI:98241]	-	-	-	-	GO:0005737//cytoplasm;GO:0005768//endosome;GO:0005794//Golgi apparatus;GO:0016020//membrane;GO:0030027//lamellipodium;GO:0030424//axon;GO:0030426//growth cone;GO:0031982//vesicle;GO:0042995//cell projection;GO:0043005//neuron projection;GO:0043025//neuronal cell body;GO:0048471//perinuclear region of cytoplasm	GO:0005515//protein binding;GO:0015631//tubulin binding;GO:0048306//calcium-dependent protein binding	GO:0007019//microtubule depolymerization;GO:0007026//negative regulation of microtubule depolymerization;GO:0010976//positive regulation of neuron projection development;GO:0010977//negative regulation of neuron projection development;GO:0031110//regulation of microtubule polymerization or depolymerization;GO:0031115//negative regulation of microtubule polymerization;GO:0031117//positive regulati…	--
ENSMUSG00000027520	0.865	0.892	0.933	2.712	3.29	3.089	75	72	81	228	307	246	Zdbf2	zinc finger, DBF-type containing 2 [Source:MGI Symbol;Acc:MGI:1921134]	-	-	-	-	GO:0005575//cellular_component;GO:0005634//nucleus	GO:0003674//molecular_function;GO:0003676//nucleic acid binding;GO:0008270//zinc ion binding;GO:0046872//metal ion binding	GO:0043045//DNA methylation involved in embryo development;GO:0071514//genetic imprinting	--
ENSMUSG00000027525	71.18	70.799	67.953	6.417	7.321	7.56	1045	980	1034	106	138	121	Phactr3	phosphatase and actin regulator 3 [Source:MGI Symbol;Acc:MGI:1921439]	-	-	-	-	GO:0005634//nucleus;GO:0005654//nucleoplasm;GO:0016363//nuclear matrix	GO:0003779//actin binding;GO:0004864//protein phosphatase inhibitor activity;GO:0008157//protein phosphatase 1 binding;GO:0019888//protein phosphatase regulator activity	GO:0030036//actin cytoskeleton organization	--
ENSMUSG00000027612	7.797	7.176	7.887	2.04	2.154	1.928	232.4	200.26	240.51	60.45	70.77	53.93	Mmp24	matrix metallopeptidase 24 [Source:MGI Symbol;Acc:MGI:1341867]	Organismal Systems	Endocrine system	ko04928//Parathyroid hormone synthesis, secretion and action	K08002	GO:0005576//extracellular region;GO:0005794//Golgi apparatus;GO:0005886//plasma membrane;GO:0005887//integral component of plasma membrane;GO:0016020//membrane;GO:0031012//extracellular matrix;GO:0032588//trans-Golgi network membrane	GO:0004222//metalloendopeptidase activity;GO:0008233//peptidase activity;GO:0008237//metallopeptidase activity;GO:0008270//zinc ion binding;GO:0016787//hydrolase activity;GO:0045296//cadherin binding;GO:0046872//metal ion binding	GO:0006508//proteolysis;GO:0007155//cell adhesion;GO:0010001//glial cell differentiation;GO:0030198//extracellular matrix organization;GO:0030574//collagen catabolic process;GO:0044331//cell-cell adhesion mediated by cadherin;GO:0050965//detection of temperature stimulus involved in sensory perception of pain;GO:0097150//neuronal stem cell population maintenance;GO:0098742//cell-cell adhesion via…	--
ENSMUSG00000027624	40.731	48.625	43.037	6.097	5.524	4.756	1588	1612	1696	235	259	194	Epb41l1	erythrocyte membrane protein band 4.1 like 1 [Source:MGI Symbol;Acc:MGI:103010]	-	-	-	-	GO:0005856//cytoskeleton	GO:0003779//actin binding;GO:0005198//structural molecule activity;GO:0008092//cytoskeletal protein binding	GO:0030866//cortical actin cytoskeleton organization	--
ENSMUSG00000027674	7.286	7.939	7.171	4.292	3.084	3.792	144	147	154	87	73	74	Pex5l	peroxisomal biogenesis factor 5-like [Source:MGI Symbol;Acc:MGI:1916672]	Cellular Processes	Transport and catabolism	ko04146//Peroxisome	K13342	GO:0005737//cytoplasm;GO:0005778//peroxisomal membrane;GO:0005829//cytosol;GO:0016020//membrane;GO:0017071//intracellular cyclic nucleotide activated cation channel complex;GO:0030425//dendrite;GO:0043235//receptor complex;GO:0048471//perinuclear region of cytoplasm;GO:0051286//cell tip	GO:0000268//peroxisome targeting sequence binding;GO:0005052//peroxisome matrix targeting signal-1 binding;GO:0005221//intracellular cyclic nucleotide activated cation channel activity;GO:0005515//protein binding;GO:0031267//small GTPase binding	GO:0016560//protein import into peroxisome matrix, docking;GO:0034220//ion transmembrane transport;GO:0042391//regulation of membrane potential;GO:0043949//regulation of cAMP-mediated signaling;GO:0045055//regulated exocytosis;GO:0045185//maintenance of protein location;GO:0051461//positive regulation of corticotropin secretion;GO:0098655//cation transmembrane transport	--
ENSMUSG00000027712	150.06	156.623	146.99	72.689	68.129	72.462	1798	1757	1802	866	900	815	Anxa5	annexin A5 [Source:MGI Symbol;Acc:MGI:106008]	-	-	-	-	GO:0005615//extracellular space;GO:0005634//nucleus;GO:0005737//cytoplasm;GO:0005783//endoplasmic reticulum;GO:0005829//cytosol;GO:0005886//plasma membrane;GO:0008021//synaptic vesicle;GO:0009897//external side of plasma membrane;GO:0014704//intercalated disc;GO:0030018//Z disc;GO:0030425//dendrite;GO:0030672//synaptic vesicle membrane;GO:0042383//sarcolemma;GO:0042995//cell projection;GO:0043025…	GO:0001786//phosphatidylserine binding;GO:0005388//P-type calcium transporter activity;GO:0005509//calcium ion binding;GO:0005515//protein binding;GO:0005544//calcium-dependent phospholipid binding;GO:0017046//peptide hormone binding;GO:0030971//receptor tyrosine kinase binding;GO:0042802//identical protein binding	GO:0007596//blood coagulation;GO:0007599//hemostasis;GO:0010033//response to organic substance;GO:0030195//negative regulation of blood coagulation;GO:0043065//positive regulation of apoptotic process;GO:0050819//negative regulation of coagulation;GO:0051592//response to calcium ion;GO:0070588//calcium ion transmembrane transport;GO:0097211//cellular response to gonadotropin-releasing hormone;GO:…	--
ENSMUSG00000027716	8.448	7.018	6.995	2.714	1.738	1.917	216	168	183	69	49	46	Trpc3	transient receptor potential cation channel, subfamily C, member 3 [Source:MGI Symbol;Acc:MGI:109526]	Human Diseases;Organismal Systems;Human Diseases	Neurodegenerative disease;Development and regeneration;Neurodegenerative disease	ko05022//Pathways of neurodegeneration - multiple diseases;ko04360//Axon guidance;ko05017//Spinocerebellar ataxia	K04966;K04966;K04966	GO:0005886//plasma membrane;GO:0016020//membrane;GO:0016021//integral component of membrane;GO:0034703//cation channel complex	GO:0005216//ion channel activity;GO:0005227//calcium activated cation channel activity;GO:0005262//calcium channel activity;GO:0005515//protein binding;GO:0015279//store-operated calcium channel activity;GO:0046872//metal ion binding;GO:0070679//inositol 1,4,5 trisphosphate binding	GO:0006811//ion transport;GO:0006816//calcium ion transport;GO:0007338//single fertilization;GO:0010524//positive regulation of calcium ion transport into cytosol;GO:0033198//response to ATP;GO:0051480//regulation of cytosolic calcium ion concentration;GO:0051592//response to calcium ion;GO:0055085//transmembrane transport;GO:0070588//calcium ion transmembrane transport;GO:1903244//positive regul…	--
ENSMUSG00000027748	0.456	0.933	0.813	0.167	0.241	0.097	10	21	20	4	6	2	Trpc4	transient receptor potential cation channel, subfamily C, member 4 [Source:MGI Symbol;Acc:MGI:109525]	Organismal Systems;Organismal Systems;Organismal Systems	Development and regeneration;Endocrine system;Sensory system	ko04360//Axon guidance;ko04929//GnRH secretion;ko04745//Phototransduction - fly	K04967;K04967;K04967	GO:0005737//cytoplasm;GO:0005886//plasma membrane;GO:0005901//caveola;GO:0005911//cell-cell junction;GO:0009986//cell surface;GO:0016020//membrane;GO:0016021//integral component of membrane;GO:0016323//basolateral plasma membrane;GO:0030863//cortical cytoskeleton;GO:0032991//protein-containing complex;GO:0034703//cation channel complex;GO:0034704//calcium channel complex;GO:0045121//membrane raft	GO:0005216//ion channel activity;GO:0005262//calcium channel activity;GO:0005515//protein binding;GO:0008013//beta-catenin binding;GO:0015279//store-operated calcium channel activity;GO:0045296//cadherin binding;GO:0070679//inositol 1,4,5 trisphosphate binding	GO:0006811//ion transport;GO:0006816//calcium ion transport;GO:0014051//gamma-aminobutyric acid secretion;GO:0048709//oligodendrocyte differentiation;GO:0051480//regulation of cytosolic calcium ion concentration;GO:0051924//regulation of calcium ion transport;GO:0055085//transmembrane transport;GO:0070509//calcium ion import;GO:0070588//calcium ion transmembrane transport;GO:0099605//regulation o…	--
ENSMUSG00000027765	24.762	24.916	22.939	5.91	7.223	4.425	531	491	509	131	170	101	P2ry1	purinergic receptor P2Y, G-protein coupled 1 [Source:MGI Symbol;Acc:MGI:105049]	Environmental Information Processing;Environmental Information Processing;Organismal Systems;Organismal Systems	Signaling molecules and interaction;Signal transduction;Immune system;Sensory system	ko04080//Neuroactive ligand-receptor interaction;ko04015//Rap1 signaling pathway;ko04611//Platelet activation;ko04742//Taste transduction	K04270;K04270;K04270;K04270	GO:0005739//mitochondrion;GO:0005886//plasma membrane;GO:0005929//cilium;GO:0014069//postsynaptic density;GO:0016020//membrane;GO:0016021//integral component of membrane;GO:0016323//basolateral plasma membrane;GO:0016324//apical plasma membrane;GO:0030425//dendrite;GO:0044297//cell body;GO:0045211//postsynaptic membrane;GO:0048787//presynaptic active zone membrane;GO:0098978//glutamatergic synapse	GO:0000166//nucleotide binding;GO:0001621//G protein-coupled ADP receptor activity;GO:0004930//G protein-coupled receptor activity;GO:0005524//ATP binding;GO:0031686//A1 adenosine receptor binding;GO:0038023//signaling receptor activity;GO:0043531//ADP binding;GO:0045028//G protein-coupled purinergic nucleotide receptor activity;GO:0045031//G protein-coupled ATP receptor activity;GO:0046982//prot…	GO:0001934//positive regulation of protein phosphorylation;GO:0001973//G protein-coupled adenosine receptor signaling pathway;GO:0006811//ion transport;GO:0007165//signal transduction;GO:0007186//G protein-coupled receptor signaling pathway;GO:0007193//adenylate cyclase-inhibiting G protein-coupled receptor signaling pathway;GO:0007200//phospholipase C-activating G protein-coupled receptor signal…	--
ENSMUSG00000027797	113.445	108.155	107.89	244.311	248.735	245.146	4586	4064	4421	8906	10061	8445	Dclk1	doublecortin-like kinase 1 [Source:MGI Symbol;Acc:MGI:1330861]	-	-	-	-	GO:0005737//cytoplasm;GO:0014069//postsynaptic density;GO:0030424//axon;GO:0030426//growth cone;GO:0042995//cell projection;GO:0043005//neuron projection	GO:0000166//nucleotide binding;GO:0004672//protein kinase activity;GO:0004674//protein serine/threonine kinase activity;GO:0005524//ATP binding;GO:0008017//microtubule binding;GO:0016301//kinase activity;GO:0016740//transferase activity;GO:0106310//protein serine kinase activity	GO:0001764//neuron migration;GO:0006468//protein phosphorylation;GO:0007399//nervous system development;GO:0007409//axonogenesis;GO:0007420//brain development;GO:0009615//response to virus;GO:0016310//phosphorylation;GO:0018105//peptidyl-serine phosphorylation;GO:0021952//central nervous system projection neuron axonogenesis;GO:0030154//cell differentiation;GO:0030900//forebrain development;GO:00…	--
ENSMUSG00000027820	2.316	2.255	3.222	0.426	0.763	0.658	80.02	79	102	18	28	19	Mme	membrane metallo endopeptidase [Source:MGI Symbol;Acc:MGI:97004]	Human Diseases;Organismal Systems;Organismal Systems;Organismal Systems	Neurodegenerative disease;Immune system;Digestive system;Endocrine system	ko05010//Alzheimer disease;ko04640//Hematopoietic cell lineage;ko04974//Protein digestion and absorption;ko04614//Renin-angiotensin system	K01389;K01389;K01389;K01389	GO:0005737//cytoplasm;GO:0005769//early endosome;GO:0005802//trans-Golgi network;GO:0005886//plasma membrane;GO:0005903//brush border;GO:0008021//synaptic vesicle;GO:0016020//membrane;GO:0030424//axon;GO:0030425//dendrite;GO:0031410//cytoplasmic vesicle;GO:0043025//neuronal cell body;GO:0044306//neuron projection terminus;GO:0045121//membrane raft;GO:0045202//synapse;GO:0098793//presynapse	GO:0001786//phosphatidylserine binding;GO:0004175//endopeptidase activity;GO:0004222//metalloendopeptidase activity;GO:0008233//peptidase activity;GO:0008237//metallopeptidase activity;GO:0008238//exopeptidase activity;GO:0008270//zinc ion binding;GO:0016787//hydrolase activity;GO:0042277//peptide binding;GO:0042803//protein homodimerization activity;GO:0046872//metal ion binding;GO:0070012//olig…	GO:0001822//kidney development;GO:0001890//placenta development;GO:0006508//proteolysis;GO:0006518//peptide metabolic process;GO:0007568//aging;GO:0007611//learning or memory;GO:0010814//substance P catabolic process;GO:0010815//bradykinin catabolic process;GO:0016485//protein processing;GO:0019233//sensory perception of pain;GO:0030163//protein catabolic process;GO:0030324//lung development;GO:0…	--
ENSMUSG00000027827	2.181	1.807	1.61	0.895	1.131	0.664	49	38	37	20	28	14	Kcnab1	potassium voltage-gated channel, shaker-related subfamily, beta member 1 [Source:MGI Symbol;Acc:MGI:109155]	-	-	-	-	GO:0005737//cytoplasm;GO:0005829//cytosol;GO:0005886//plasma membrane;GO:0008076//voltage-gated potassium channel complex;GO:0016020//membrane;GO:0016021//integral component of membrane;GO:0030424//axon;GO:0031234//extrinsic component of cytoplasmic side of plasma membrane;GO:0032839//dendrite cytoplasm;GO:0034705//potassium channel complex;GO:0043025//neuronal cell body;GO:0043204//perikaryon;GO…	GO:0004033//aldo-keto reductase (NADP) activity;GO:0005244//voltage-gated ion channel activity;GO:0005249//voltage-gated potassium channel activity;GO:0005515//protein binding;GO:0015459//potassium channel regulator activity;GO:0016491//oxidoreductase activity;GO:0019904//protein domain specific binding;GO:0044325//transmembrane transporter binding;GO:0070402//NADPH binding;GO:0140678//molecular …	GO:0006811//ion transport;GO:0006813//potassium ion transport;GO:0007611//learning or memory;GO:0034220//ion transmembrane transport;GO:0034765//regulation of ion transmembrane transport;GO:0055085//transmembrane transport;GO:0071805//potassium ion transmembrane transport;GO:1901016//regulation of potassium ion transmembrane transporter activity;GO:1901379//regulation of potassium ion transmembra…	--
ENSMUSG00000027840	1.655	2.418	1.617	0.832	1.185	0.789	38	52	38	19	30	17	Wnt2b	wingless-type MMTV integration site family, member 2B [Source:MGI Symbol;Acc:MGI:1261834]	Human Diseases;Human Diseases;Human Diseases;Human Diseases;Human Diseases;Human Diseases;Environmental Information Processing;Human Diseases;Environmental Information Processing;Environmental Information Processing;Human Diseases;Human Diseases;Cellular Processes;Organismal Systems;Human Diseases	Cancer: overview;Neurodegenerative disease;Neurodegenerative disease;Infectious disease: viral;Cancer: overview;Cancer: specific types;Signal transduction;Endocrine and metabolic disease;Signal transduction;Signal transduction;Cancer: specific types;Cancer: specific types;Cellular community - eukaryotes;Endocrine system;Cancer: specific types	ko05200//Pathways in cancer;ko05022//Pathways of neurodegeneration - multiple diseases;ko05010//Alzheimer disease;ko05165//Human papillomavirus infection;ko05205//Proteoglycans in cancer;ko05225//Hepatocellular carcinoma;ko04310//Wnt signaling pathway;ko04934//Cushing syndrome;ko04150//mTOR signaling pathway;ko04390//Hippo signaling pathway;ko05226//Gastric cancer;ko05224//Breast cancer;ko04550//…	K00182;K00182;K00182;K00182;K00182;K00182;K00182;K00182;K00182;K00182;K00182;K00182;K00182;K00182;K00182	GO:0005576//extracellular region;GO:0005615//extracellular space;GO:0043231//intracellular membrane-bounded organelle	GO:0005102//signaling receptor binding;GO:0005109//frizzled binding;GO:0005125//cytokine activity;GO:0005515//protein binding	GO:0002062//chondrocyte differentiation;GO:0007165//signal transduction;GO:0007267//cell-cell signaling;GO:0007275//multicellular organism development;GO:0008584//male gonad development;GO:0009267//cellular response to starvation;GO:0009887//animal organ morphogenesis;GO:0016055//Wnt signaling pathway;GO:0021871//forebrain regionalization;GO:0030182//neuron differentiation;GO:0045165//cell fate c…	--
ENSMUSG00000027849	3.53	3.244	3.856	1.227	1.044	1.572	99	92	120	36	35	44	Syt6	synaptotagmin VI [Source:MGI Symbol;Acc:MGI:1859544]	-	-	-	-	GO:0005737//cytoplasm;GO:0005829//cytosol;GO:0005886//plasma membrane;GO:0016020//membrane;GO:0016021//integral component of membrane;GO:0019898//extrinsic component of membrane;GO:0030672//synaptic vesicle membrane;GO:0031410//cytoplasmic vesicle;GO:0045202//synapse;GO:0070382//exocytic vesicle;GO:0097038//perinuclear endoplasmic reticulum;GO:0097060//synaptic membrane;GO:0098794//postsynapse;GO…	GO:0000149//SNARE binding;GO:0001786//phosphatidylserine binding;GO:0005509//calcium ion binding;GO:0005515//protein binding;GO:0005544//calcium-dependent phospholipid binding;GO:0019905//syntaxin binding;GO:0030276//clathrin binding;GO:0042802//identical protein binding;GO:0042803//protein homodimerization activity;GO:0046872//metal ion binding;GO:0046982//protein heterodimerization activity;GO:…	GO:0007340//acrosome reaction;GO:0014059//regulation of dopamine secretion;GO:0016192//vesicle-mediated transport;GO:0017156//calcium-ion regulated exocytosis;GO:0017158//regulation of calcium ion-dependent exocytosis;GO:0060478//acrosomal vesicle exocytosis;GO:0071277//cellular response to calcium ion;GO:0150038//postsynaptic dense core vesicle exocytosis	--
ENSMUSG00000027858	56.254	54.612	53.784	4.536	4.062	4.531	1746	1587	1708	140	139	118	Tspan2	tetraspanin 2 [Source:MGI Symbol;Acc:MGI:1917997]	-	-	-	-	GO:0005654//nucleoplasm;GO:0005886//plasma membrane;GO:0016020//membrane;GO:0016021//integral component of membrane;GO:0043209//myelin sheath	GO:0003674//molecular_function	GO:0006954//inflammatory response;GO:0007420//brain development;GO:0014002//astrocyte development;GO:0014005//microglia development;GO:0042552//myelination;GO:0048709//oligodendrocyte differentiation;GO:0061564//axon development	--
ENSMUSG00000027859	2.621	2.831	2.395	0.321	0.145	0	18	18	19	2	1	0	Ngf	nerve growth factor [Source:MGI Symbol;Acc:MGI:97321]	Environmental Information Processing;Environmental Information Processing;Environmental Information Processing;Environmental Information Processing;Environmental Information Processing;Environmental Information Processing;Cellular Processes;Organismal Systems;Organismal Systems	Signal transduction;Signal transduction;Signaling molecules and interaction;Signal transduction;Signal transduction;Signal transduction;Cell growth and death;Sensory system;Nervous system	ko04151//PI3K-Akt signaling pathway;ko04020//Calcium signaling pathway;ko04060//Cytokine-cytokine receptor interaction;ko04010//MAPK signaling pathway;ko04014//Ras signaling pathway;ko04015//Rap1 signaling pathway;ko04210//Apoptosis;ko04750//Inflammatory mediator regulation of TRP channels;ko04722//Neurotrophin signaling pathway	K02582;K02582;K02582;K02582;K02582;K02582;K02582;K02582;K02582	GO:0005576//extracellular region;GO:0005615//extracellular space;GO:0005768//endosome;GO:0005788//endoplasmic reticulum lumen;GO:0008021//synaptic vesicle;GO:0030424//axon;GO:0030425//dendrite;GO:0031904//endosome lumen	GO:0004857//enzyme inhibitor activity;GO:0005102//signaling receptor binding;GO:0005163//nerve growth factor receptor binding;GO:0008083//growth factor activity;GO:0008191//metalloendopeptidase inhibitor activity;GO:0008289//lipid binding;GO:0008656//cysteine-type endopeptidase activator activity involved in apoptotic process;GO:0030297//transmembrane receptor protein tyrosine kinase activator ac…	GO:0001934//positive regulation of protein phosphorylation;GO:0006468//protein phosphorylation;GO:0006919//activation of cysteine-type endopeptidase activity involved in apoptotic process;GO:0007169//transmembrane receptor protein tyrosine kinase signaling pathway;GO:0007422//peripheral nervous system development;GO:0007613//memory;GO:0007623//circadian rhythm;GO:0008284//positive regulation of c…	--
ENSMUSG00000027895	0.728	1.515	0.847	6.34	6.754	6.883	18	36	22	160	189	164	Kcnc4	potassium voltage gated channel, Shaw-related subfamily, member 4 [Source:MGI Symbol;Acc:MGI:96670]	-	-	-	-	GO:0005783//endoplasmic reticulum;GO:0005794//Golgi apparatus;GO:0005886//plasma membrane;GO:0008021//synaptic vesicle;GO:0008076//voltage-gated potassium channel complex;GO:0009986//cell surface;GO:0016020//membrane;GO:0016021//integral component of membrane;GO:0030424//axon;GO:0030425//dendrite;GO:0031594//neuromuscular junction;GO:0032590//dendrite membrane;GO:0032809//neuronal cell body membr…	GO:0005216//ion channel activity;GO:0005244//voltage-gated ion channel activity;GO:0005249//voltage-gated potassium channel activity;GO:0005251//delayed rectifier potassium channel activity;GO:0005267//potassium channel activity;GO:0005515//protein binding;GO:0099508//voltage-gated ion channel activity involved in regulation of presynaptic membrane potential;GO:1905030//voltage-gated ion channel …	GO:0006811//ion transport;GO:0006813//potassium ion transport;GO:0034765//regulation of ion transmembrane transport;GO:0046928//regulation of neurotransmitter secretion;GO:0051260//protein homooligomerization;GO:0055085//transmembrane transport;GO:0060078//regulation of postsynaptic membrane potential;GO:0071805//potassium ion transmembrane transport;GO:0099505//regulation of presynaptic membrane…	--
ENSMUSG00000027931	0.604	1.037	0.717	3.966	4.834	5.488	17	19	17	111	150	145	Npr1	natriuretic peptide receptor 1 [Source:MGI Symbol;Acc:MGI:97371]	Metabolism;Organismal Systems;Environmental Information Processing;Environmental Information Processing;Organismal Systems;Organismal Systems;Metabolism;Organismal Systems;Organismal Systems;Organismal Systems	Global and overview maps;Environmental adaptation;Signal transduction;Signal transduction;Endocrine system;Circulatory system;Nucleotide metabolism;Endocrine system;Endocrine system;Endocrine system	ko01100//Metabolic pathways;ko04714//Thermogenesis;ko04024//cAMP signaling pathway;ko04022//cGMP-PKG signaling pathway;ko04921//Oxytocin signaling pathway;ko04270//Vascular smooth muscle contraction;ko00230//Purine metabolism;ko04925//Aldosterone synthesis and secretion;ko04924//Renin secretion;ko04923//Regulation of lipolysis in adipocytes	K12323;K12323;K12323;K12323;K12323;K12323;K12323;K12323;K12323;K12323	GO:0005886//plasma membrane;GO:0016020//membrane;GO:0016021//integral component of membrane;GO:0043235//receptor complex;GO:1990620//ANPR-A receptor complex	GO:0000166//nucleotide binding;GO:0001653//peptide receptor activity;GO:0004383//guanylate cyclase activity;GO:0004672//protein kinase activity;GO:0005524//ATP binding;GO:0005525//GTP binding;GO:0016829//lyase activity;GO:0016849//phosphorus-oxygen lyase activity;GO:0016941//natriuretic peptide receptor activity;GO:0017046//peptide hormone binding;GO:0042562//hormone binding	GO:0006182//cGMP biosynthetic process;GO:0006468//protein phosphorylation;GO:0007165//signal transduction;GO:0007166//cell surface receptor signaling pathway;GO:0007168//receptor guanylyl cyclase signaling pathway;GO:0008217//regulation of blood pressure;GO:0009190//cyclic nucleotide biosynthetic process;GO:0010753//positive regulation of cGMP-mediated signaling;GO:0019934//cGMP-mediated signalin…	--
ENSMUSG00000027978	0.611	0.652	0.488	2.68	1.511	1.479	11	11	9	48	30	25	Prss12	protease, serine 12 neurotrypsin (motopsin) [Source:MGI Symbol;Acc:MGI:1100881]	-	-	-	-	GO:0005576//extracellular region;GO:0005886//plasma membrane;GO:0016020//membrane;GO:0030424//axon;GO:0030425//dendrite;GO:0031410//cytoplasmic vesicle;GO:0043083//synaptic cleft;GO:0043195//terminal bouton;GO:0045202//synapse	GO:0004252//serine-type endopeptidase activity;GO:0005044//scavenger receptor activity;GO:0008233//peptidase activity;GO:0008236//serine-type peptidase activity;GO:0016787//hydrolase activity	GO:0006508//proteolysis;GO:0006887//exocytosis;GO:0006897//endocytosis;GO:0031638//zymogen activation	--
ENSMUSG00000027985	0.364	0.23	0.042	1.21	1.917	1.017	7	5	1	29	40	23	Lef1	lymphoid enhancer binding factor 1 [Source:MGI Symbol;Acc:MGI:96770]	Human Diseases;Human Diseases;Human Diseases;Human Diseases;Environmental Information Processing;Human Diseases;Environmental Information Processing;Human Diseases;Human Diseases;Human Diseases;Organismal Systems;Human Diseases;Human Diseases;Human Diseases;Human Diseases;Cellular Processes;Human Diseases;Human Diseases;Human Diseases	Cancer: overview;Infectious disease: bacterial;Infectious disease: viral;Cancer: specific types;Signal transduction;Endocrine and metabolic disease;Signal transduction;Cancer: specific types;Cancer: specific types;Endocrine and metabolic disease;Endocrine system;Cancer: specific types;Cancer: specific types;Cardiovascular disease;Cancer: specific types;Cellular community - eukaryotes;Cancer: spec…	ko05200//Pathways in cancer;ko05132//Salmonella infection;ko05167//Kaposi sarcoma-associated herpesvirus infection;ko05225//Hepatocellular carcinoma;ko04310//Wnt signaling pathway;ko04934//Cushing syndrome;ko04390//Hippo signaling pathway;ko05226//Gastric cancer;ko05224//Breast cancer;ko04936//Alcoholic liver disease;ko04916//Melanogenesis;ko05215//Prostate cancer;ko05210//Colorectal cancer;ko054…	K04492;K04492;K04492;K04492;K04492;K04492;K04492;K04492;K04492;K04492;K04492;K04492;K04492;K04492;K04492;K04492;K04492;K04492;K04492	GO:0005634//nucleus;GO:0005654//nucleoplasm;GO:0005667//transcription regulator complex;GO:0005737//cytoplasm;GO:0032993//protein-DNA complex;GO:0090575//RNA polymerase II transcription regulator complex;GO:1990907//beta-catenin-TCF complex	GO:0000976//transcription cis-regulatory region binding;GO:0000977//RNA polymerase II transcription regulatory region sequence-specific DNA binding;GO:0000978//RNA polymerase II cis-regulatory region sequence-specific DNA binding;GO:0000981//DNA-binding transcription factor activity, RNA polymerase II-specific;GO:0000987//cis-regulatory region sequence-specific DNA binding;GO:0001222//transcripti…	GO:0000122//negative regulation of transcription by RNA polymerase II;GO:0001569//branching involved in blood vessel morphogenesis;GO:0001649//osteoblast differentiation;GO:0001756//somitogenesis;GO:0001837//epithelial to mesenchymal transition;GO:0001944//vasculature development;GO:0002040//sprouting angiogenesis;GO:0006355//regulation of transcription, DNA-templated;GO:0006357//regulation of tr…	HMG
ENSMUSG00000027996	6.708	6.086	6.203	17.844	20.018	19.44	93	79	88	246	306	253	Sfrp2	secreted frizzled-related protein 2 [Source:MGI Symbol;Acc:MGI:108078]	Environmental Information Processing	Signal transduction	ko04310//Wnt signaling pathway	K02176	GO:0005576//extracellular region;GO:0005615//extracellular space	GO:0005515//protein binding;GO:0008047//enzyme activator activity;GO:0017147//Wnt-protein binding;GO:0048018//receptor ligand activity;GO:0061133//endopeptidase activator activity	GO:0001569//branching involved in blood vessel morphogenesis;GO:0001756//somitogenesis;GO:0001843//neural tube closure;GO:0002063//chondrocyte development;GO:0003151//outflow tract morphogenesis;GO:0003214//cardiac left ventricle morphogenesis;GO:0003402//planar cell polarity pathway involved in axis elongation;GO:0006915//apoptotic process;GO:0007501//mesodermal cell fate specification;GO:000758…	--
ENSMUSG00000028121	69.167	65.13	66.649	25.073	25.121	26.415	1438	1390	1556	443	552	487	Bcar3	breast cancer anti-estrogen resistance 3 [Source:MGI Symbol;Acc:MGI:1352501]	-	-	-	-	GO:0005737//cytoplasm;GO:0005925//focal adhesion;GO:0016020//membrane;GO:0070161//anchoring junction	GO:0001784//phosphotyrosine residue binding;GO:0005085//guanyl-nucleotide exchange factor activity;GO:0005515//protein binding;GO:0019900//kinase binding	GO:0002089//lens morphogenesis in camera-type eye;GO:0007165//signal transduction;GO:0007264//small GTPase mediated signal transduction;GO:0008286//insulin receptor signaling pathway;GO:0033138//positive regulation of peptidyl-serine phosphorylation;GO:0043410//positive regulation of MAPK cascade;GO:0043547//positive regulation of GTPase activity;GO:0045740//positive regulation of DNA replication…	--
ENSMUSG00000028289	3.061	2.595	2.485	0.879	1.097	1.027	133	104	110	40	47	45	Epha7	Eph receptor A7 [Source:MGI Symbol;Acc:MGI:95276]	Organismal Systems	Development and regeneration	ko04360//Axon guidance	K05108	GO:0005886//plasma membrane;GO:0005887//integral component of plasma membrane;GO:0016020//membrane;GO:0016021//integral component of membrane;GO:0030425//dendrite;GO:0031594//neuromuscular junction;GO:0043005//neuron projection;GO:0043025//neuronal cell body;GO:0043235//receptor complex;GO:0045211//postsynaptic membrane;GO:0098685//Schaffer collateral - CA1 synapse;GO:0098686//hippocampal mossy f…	GO:0000166//nucleotide binding;GO:0004672//protein kinase activity;GO:0004713//protein tyrosine kinase activity;GO:0004714//transmembrane receptor protein tyrosine kinase activity;GO:0005003//ephrin receptor activity;GO:0005004//GPI-linked ephrin receptor activity;GO:0005005//transmembrane-ephrin receptor activity;GO:0005515//protein binding;GO:0005524//ATP binding;GO:0008046//axon guidance recep…	GO:0001934//positive regulation of protein phosphorylation;GO:0006468//protein phosphorylation;GO:0006915//apoptotic process;GO:0007169//transmembrane receptor protein tyrosine kinase signaling pathway;GO:0007399//nervous system development;GO:0007411//axon guidance;GO:0007420//brain development;GO:0016310//phosphorylation;GO:0018108//peptidyl-tyrosine phosphorylation;GO:0022407//regulation of ce…	--
ENSMUSG00000028337	0.211	0.375	0.306	0	0.064	0.037	6	10	9	0	2	1	Coro2a	coronin, actin binding protein 2A [Source:MGI Symbol;Acc:MGI:1345966]	-	-	-	-	GO:0005903//brush border;GO:0017053//transcription repressor complex	GO:0003779//actin binding;GO:0005515//protein binding;GO:0051015//actin filament binding	-	--
ENSMUSG00000028339	0.288	0.597	0.31	1.629	1.859	1.399	5	20	11	58	73	47	Col15a1	collagen, type XV, alpha 1 [Source:MGI Symbol;Acc:MGI:88449]	Organismal Systems	Digestive system	ko04974//Protein digestion and absorption	K08135	GO:0005576//extracellular region;GO:0005581//collagen trimer;GO:0005604//basement membrane;GO:0005615//extracellular space;GO:0031012//extracellular matrix;GO:0062023//collagen-containing extracellular matrix	GO:0005201//extracellular matrix structural constituent;GO:0005515//protein binding;GO:0030020//extracellular matrix structural constituent conferring tensile strength	GO:0001525//angiogenesis;GO:0001886//endothelial cell morphogenesis;GO:0007155//cell adhesion;GO:0030198//extracellular matrix organization	--
ENSMUSG00000028341	6.269	5.374	5.573	12.64	12.248	11.221	236	191	219	467	495	398	Nr4a3	nuclear receptor subfamily 4, group A, member 3 [Source:MGI Symbol;Acc:MGI:1352457]	Human Diseases	Cancer: overview	ko05202//Transcriptional misregulation in cancer	K08559	GO:0005634//nucleus;GO:0005667//transcription regulator complex	GO:0000978//RNA polymerase II cis-regulatory region sequence-specific DNA binding;GO:0000981//DNA-binding transcription factor activity, RNA polymerase II-specific;GO:0001223//transcription coactivator binding;GO:0001228//DNA-binding transcription activator activity, RNA polymerase II-specific;GO:0003677//DNA binding;GO:0003700//DNA-binding transcription factor activity;GO:0004879//nuclear recept…	GO:0000122//negative regulation of transcription by RNA polymerase II;GO:0001707//mesoderm formation;GO:0006351//transcription, DNA-templated;GO:0006355//regulation of transcription, DNA-templated;GO:0006357//regulation of transcription by RNA polymerase II;GO:0007369//gastrulation;GO:0007411//axon guidance;GO:0009444//pyruvate oxidation;GO:0010613//positive regulation of cardiac muscle hypertrop…	NGFIB-like
ENSMUSG00000028351	27.166	28.344	28.706	4.207	4.895	4.744	604	590	653	93	120	99	Brinp1	bone morphogenic protein/retinoic acid inducible neural specific 1 [Source:MGI Symbol;Acc:MGI:1928478]	-	-	-	-	GO:0005575//cellular_component;GO:0005737//cytoplasm;GO:0005783//endoplasmic reticulum;GO:0030425//dendrite;GO:0043025//neuronal cell body	GO:0003674//molecular_function	GO:0001662//behavioral fear response;GO:0007049//cell cycle;GO:0007614//short-term memory;GO:0008219//cell death;GO:0022008//neurogenesis;GO:0035176//social behavior;GO:0035640//exploration behavior;GO:0042711//maternal behavior;GO:0045666//positive regulation of neuron differentiation;GO:0045786//negative regulation of cell cycle;GO:0045930//negative regulation of mitotic cell cycle;GO:0050768//…	--
ENSMUSG00000028358	6.334	7.622	6.717	1.44	1.203	1.343	367	379	385	78	81	77	Zfp618	zinc finger protein 618 [Source:MGI Symbol;Acc:MGI:1919950]	-	-	-	-	GO:0000785//chromatin;GO:0005634//nucleus;GO:0005694//chromosome;GO:0005721//pericentric heterochromatin	GO:0001221//transcription coregulator binding;GO:0003677//DNA binding;GO:0042802//identical protein binding;GO:0046872//metal ion binding	GO:0035563//positive regulation of chromatin binding	zf-C2H2
ENSMUSG00000028369	2.497	2.468	2.465	15.918	15.944	15.365	201	186	203	1274	1415	1161	Svep1	sushi, von Willebrand factor type A, EGF and pentraxin domain containing 1 [Source:MGI Symbol;Acc:MGI:1928849]	-	-	-	-	GO:0005576//extracellular region;GO:0005615//extracellular space;GO:0005634//nucleus;GO:0005737//cytoplasm;GO:0016020//membrane;GO:0031012//extracellular matrix	GO:0003682//chromatin binding;GO:0005509//calcium ion binding;GO:0005515//protein binding	GO:0001945//lymph vessel development;GO:0003017//lymph circulation;GO:0007155//cell adhesion;GO:0008544//epidermis development;GO:0010467//gene expression;GO:0016477//cell migration;GO:0036303//lymph vessel morphogenesis;GO:0048014//Tie signaling pathway;GO:0050896//response to stimulus;GO:0090136//epithelial cell-cell adhesion;GO:0120193//tight junction organization	--
ENSMUSG00000028370	0.445	0.294	0.295	0.87	0.939	1.005	34	21	23	66	79	72	Pappa	pregnancy-associated plasma protein A [Source:MGI Symbol;Acc:MGI:97479]	-	-	-	-	GO:0005576//extracellular region;GO:0005615//extracellular space	GO:0004175//endopeptidase activity;GO:0004222//metalloendopeptidase activity;GO:0008233//peptidase activity;GO:0008237//metallopeptidase activity;GO:0016787//hydrolase activity;GO:0046872//metal ion binding	GO:0006508//proteolysis;GO:0007166//cell surface receptor signaling pathway;GO:0007565//female pregnancy;GO:0030163//protein catabolic process;GO:0032354//response to follicle-stimulating hormone;GO:0071548//response to dexamethasone	--
ENSMUSG00000028399	38.661	39.723	36.374	18.581	20.604	17.725	1633	1545	1592	776	885	738	Ptprd	protein tyrosine phosphatase, receptor type, D [Source:MGI Symbol;Acc:MGI:97812]	-	-	-	-	GO:0016020//membrane;GO:0042734//presynaptic membrane;GO:0098685//Schaffer collateral - CA1 synapse;GO:0098686//hippocampal mossy fiber to CA3 synapse;GO:0098978//glutamatergic synapse	GO:0004721//phosphoprotein phosphatase activity;GO:0004725//protein tyrosine phosphatase activity;GO:0005102//signaling receptor binding;GO:0005515//protein binding;GO:0016787//hydrolase activity;GO:0016791//phosphatase activity;GO:0050839//cell adhesion molecule binding	GO:0006470//protein dephosphorylation;GO:0007157//heterophilic cell-cell adhesion via plasma membrane cell adhesion molecules;GO:0016043//cellular component organization;GO:0016311//dephosphorylation;GO:0030182//neuron differentiation;GO:0046426//negative regulation of receptor signaling pathway via JAK-STAT;GO:0050775//positive regulation of dendrite morphogenesis;GO:0050776//regulation of immun…	--
ENSMUSG00000028464	1.714	1.433	1.57	5.256	4.586	5.871	16	13	15	69	64	67	Tpm2	tropomyosin 2, beta [Source:MGI Symbol;Acc:MGI:98810]	-	-	-	-	GO:0005737//cytoplasm;GO:0005856//cytoskeleton;GO:0005862//muscle thin filament tropomyosin;GO:0005884//actin filament;GO:0015629//actin cytoskeleton	GO:0003779//actin binding;GO:0005200//structural constituent of cytoskeleton;GO:0005515//protein binding;GO:0042802//identical protein binding;GO:0042803//protein homodimerization activity;GO:0046982//protein heterodimerization activity;GO:0051015//actin filament binding	GO:0006936//muscle contraction;GO:0007015//actin filament organization;GO:0043462//regulation of ATPase activity	--
ENSMUSG00000028488	14.765	14.837	14.807	35.106	31.776	31.121	279	253	280	635	639	535	Sh3gl2	SH3-domain GRB2-like 2 [Source:MGI Symbol;Acc:MGI:700009]	Cellular Processes	Transport and catabolism	ko04144//Endocytosis	K11247	GO:0005737//cytoplasm;GO:0005768//endosome;GO:0005769//early endosome;GO:0005829//cytosol;GO:0016020//membrane;GO:0030672//synaptic vesicle membrane;GO:0042995//cell projection;GO:0043025//neuronal cell body;GO:0045202//synapse;GO:0048471//perinuclear region of cytoplasm;GO:0097441//basal dendrite;GO:0098684//photoreceptor ribbon synapse;GO:0098685//Schaffer collateral - CA1 synapse;GO:0098686//h…	GO:0005515//protein binding;GO:0008022//protein C-terminus binding;GO:0008289//lipid binding;GO:0019901//protein kinase binding;GO:0042802//identical protein binding	GO:0001933//negative regulation of protein phosphorylation;GO:0002090//regulation of receptor internalization;GO:0006897//endocytosis;GO:0010629//negative regulation of gene expression;GO:0016191//synaptic vesicle uncoating;GO:0031175//neuron projection development;GO:0048488//synaptic vesicle endocytosis;GO:0060988//lipid tube assembly;GO:0097484//dendrite extension;GO:0097749//membrane tubulati…	--
ENSMUSG00000028528	7.469	5.686	5.707	0.756	0.639	0.607	247	192	176	24	25	21	Dnajc6	DnaJ heat shock protein family (Hsp40) member C6 [Source:MGI Symbol;Acc:MGI:1919935]	Cellular Processes	Transport and catabolism	ko04144//Endocytosis	K09526	GO:0005737//cytoplasm;GO:0014069//postsynaptic density;GO:0031982//vesicle;GO:0043231//intracellular membrane-bounded organelle;GO:0045202//synapse;GO:0098894//extrinsic component of presynaptic endocytic zone membrane	GO:0004721//phosphoprotein phosphatase activity;GO:0004725//protein tyrosine phosphatase activity;GO:0016787//hydrolase activity;GO:0016791//phosphatase activity;GO:0017124//SH3 domain binding;GO:0030276//clathrin binding	GO:0016191//synaptic vesicle uncoating;GO:0016311//dephosphorylation;GO:0072318//clathrin coat disassembly;GO:0072583//clathrin-dependent endocytosis;GO:2000369//regulation of clathrin-dependent endocytosis	--
ENSMUSG00000028597	2.354	2.394	2.081	6.312	5.998	9.194	21	20	19	56	59	77	Gpx7	glutathione peroxidase 7 [Source:MGI Symbol;Acc:MGI:1914555]	Metabolism;Human Diseases;Human Diseases;Human Diseases;Metabolism;Organismal Systems;Metabolism	Global and overview maps;Neurodegenerative disease;Neurodegenerative disease;Neurodegenerative disease;Lipid metabolism;Endocrine system;Metabolism of other amino acids	ko01100//Metabolic pathways;ko05022//Pathways of neurodegeneration - multiple diseases;ko05014//Amyotrophic lateral sclerosis;ko05016//Huntington disease;ko00590//Arachidonic acid metabolism;ko04918//Thyroid hormone synthesis;ko00480//Glutathione metabolism	K00432;K00432;K00432;K00432;K00432;K00432;K00432	GO:0005576//extracellular region;GO:0005783//endoplasmic reticulum	GO:0004096//catalase activity;GO:0004601//peroxidase activity;GO:0004602//glutathione peroxidase activity;GO:0016491//oxidoreductase activity	GO:0006979//response to oxidative stress;GO:0070887//cellular response to chemical stimulus;GO:0098869//cellular oxidant detoxification	--
ENSMUSG00000028631	0.553	0.787	0.757	1.335	1.705	1.689	15	20	21	36	51	43	Kcnq4	potassium voltage-gated channel, subfamily Q, member 4 [Source:MGI Symbol;Acc:MGI:1926803]	Organismal Systems	Nervous system	ko04725//Cholinergic synapse	K04929	GO:0005737//cytoplasm;GO:0005886//plasma membrane;GO:0008076//voltage-gated potassium channel complex;GO:0009925//basal plasma membrane;GO:0016020//membrane;GO:0043005//neuron projection	GO:0005216//ion channel activity;GO:0005244//voltage-gated ion channel activity;GO:0005249//voltage-gated potassium channel activity;GO:0005251//delayed rectifier potassium channel activity;GO:0005267//potassium channel activity;GO:0005516//calmodulin binding;GO:0015075//ion transmembrane transporter activity	GO:0006811//ion transport;GO:0006813//potassium ion transport;GO:0007605//sensory perception of sound;GO:0032227//negative regulation of synaptic transmission, dopaminergic;GO:0034765//regulation of ion transmembrane transport;GO:0042472//inner ear morphogenesis;GO:0055085//transmembrane transport;GO:0071805//potassium ion transmembrane transport	--
ENSMUSG00000028634	5.781	5.657	5.56	1.731	1.771	1.641	446	434	465	141	160	123	Hivep3	human immunodeficiency virus type I enhancer binding protein 3 [Source:MGI Symbol;Acc:MGI:106589]	-	-	-	-	GO:0005634//nucleus;GO:0005737//cytoplasm;GO:0005829//cytosol	GO:0000978//RNA polymerase II cis-regulatory region sequence-specific DNA binding;GO:0000981//DNA-binding transcription factor activity, RNA polymerase II-specific;GO:0003677//DNA binding;GO:0046872//metal ion binding	GO:0006357//regulation of transcription by RNA polymerase II;GO:0035914//skeletal muscle cell differentiation;GO:0045893//positive regulation of transcription, DNA-templated	zf-C2H2
ENSMUSG00000028747	0.212	0	0.181	0.807	0.945	0.858	2	0	3	13	15	11	Htr6	5-hydroxytryptamine (serotonin) receptor 6 [Source:MGI Symbol;Acc:MGI:1196627]	Environmental Information Processing;Environmental Information Processing;Environmental Information Processing;Organismal Systems	Signaling molecules and interaction;Signal transduction;Signal transduction;Nervous system	ko04080//Neuroactive ligand-receptor interaction;ko04020//Calcium signaling pathway;ko04024//cAMP signaling pathway;ko04726//Serotonergic synapse	K04162;K04162;K04162;K04162	GO:0005886//plasma membrane;GO:0005929//cilium;GO:0016020//membrane;GO:0016021//integral component of membrane;GO:0030425//dendrite;GO:0045202//synapse	GO:0004930//G protein-coupled receptor activity;GO:0004993//G protein-coupled serotonin receptor activity;GO:0005515//protein binding;GO:0030594//neurotransmitter receptor activity	GO:0007165//signal transduction;GO:0007186//G protein-coupled receptor signaling pathway;GO:0007187//G protein-coupled receptor signaling pathway, coupled to cyclic nucleotide second messenger;GO:0007268//chemical synaptic transmission;GO:0007612//learning;GO:0014050//negative regulation of glutamate secretion;GO:0014053//negative regulation of gamma-aminobutyric acid secretion;GO:0014054//positi…	--
ENSMUSG00000028773	3.511	3.562	4.632	10.239	10.668	10.098	20	19	27	58	67	54	Fabp3	fatty acid binding protein 3, muscle and heart [Source:MGI Symbol;Acc:MGI:95476]	Organismal Systems	Endocrine system	ko03320//PPAR signaling pathway	K08752	GO:0005615//extracellular space;GO:0005634//nucleus;GO:0005737//cytoplasm;GO:0005829//cytosol;GO:0016528//sarcoplasm	GO:0005324//long-chain fatty acid transporter activity;GO:0005504//fatty acid binding;GO:0008092//cytoskeletal protein binding;GO:0008289//lipid binding;GO:0036041//long-chain fatty acid binding;GO:0050543//icosatetraenoic acid binding;GO:0070538//oleic acid binding	GO:0015908//fatty acid transport;GO:0015909//long-chain fatty acid transport;GO:0032365//intracellular lipid transport;GO:0042632//cholesterol homeostasis;GO:0046320//regulation of fatty acid oxidation;GO:0050873//brown fat cell differentiation;GO:0055091//phospholipid homeostasis;GO:0071073//positive regulation of phospholipid biosynthetic process;GO:0140214//positive regulation of long-chain fa…	--
ENSMUSG00000028838	0.455	1.01	0.719	2.113	2.414	2.201	13	27	21	60	76	59	Extl1	exostosin-like glycosyltransferase 1 [Source:MGI Symbol;Acc:MGI:1888742]	Metabolism;Metabolism	Global and overview maps;Glycan biosynthesis and metabolism	ko01100//Metabolic pathways;ko00534//Glycosaminoglycan biosynthesis - heparan sulfate / heparin	K02368;K02368	GO:0005783//endoplasmic reticulum;GO:0005789//endoplasmic reticulum membrane;GO:0005794//Golgi apparatus;GO:0016020//membrane;GO:0016021//integral component of membrane	GO:0008375//acetylglucosaminyltransferase activity;GO:0015020//glucuronosyltransferase activity;GO:0016740//transferase activity;GO:0016757//glycosyltransferase activity;GO:0050508//glucuronosyl-N-acetylglucosaminyl-proteoglycan 4-alpha-N-acetylglucosaminyltransferase activity	GO:0006486//protein glycosylation;GO:0015012//heparan sulfate proteoglycan biosynthetic process	--
ENSMUSG00000028862	0.067	0.036	0.098	0.335	0.363	0.462	2	1	3	10	12	13	Map3k6	mitogen-activated protein kinase kinase kinase 6 [Source:MGI Symbol;Acc:MGI:1855691]	Environmental Information Processing	Signal transduction	ko04010//MAPK signaling pathway	K04425	-	GO:0000166//nucleotide binding;GO:0000287//magnesium ion binding;GO:0004672//protein kinase activity;GO:0004674//protein serine/threonine kinase activity;GO:0004709//MAP kinase kinase kinase activity;GO:0005524//ATP binding;GO:0016301//kinase activity;GO:0016740//transferase activity;GO:0046872//metal ion binding	GO:0000165//MAPK cascade;GO:0006468//protein phosphorylation;GO:0016310//phosphorylation	--
ENSMUSG00000028906	215.528	213.661	210.874	37.562	40.094	39.057	6984	6483	6997	1247	1456	1213	Epb41	erythrocyte membrane protein band 4.1 [Source:MGI Symbol;Acc:MGI:95401]	-	-	-	-	GO:0005634//nucleus;GO:0005737//cytoplasm;GO:0005829//cytosol;GO:0005856//cytoskeleton;GO:0005886//plasma membrane;GO:0005911//cell-cell junction;GO:0005938//cell cortex;GO:0009898//cytoplasmic side of plasma membrane;GO:0014069//postsynaptic density;GO:0015629//actin cytoskeleton;GO:0016020//membrane;GO:0016323//basolateral plasma membrane;GO:0016604//nuclear body;GO:0030054//cell junction;GO:00…	GO:0003779//actin binding;GO:0005198//structural molecule activity;GO:0005515//protein binding;GO:0005516//calmodulin binding;GO:0005545//1-phosphatidylinositol binding;GO:0008022//protein C-terminus binding;GO:0008092//cytoskeletal protein binding;GO:0030507//spectrin binding;GO:0047485//protein N-terminus binding;GO:0051219//phosphoprotein binding	GO:0001558//regulation of cell growth;GO:0007010//cytoskeleton organization;GO:0007049//cell cycle;GO:0008360//regulation of cell shape;GO:0030036//actin cytoskeleton organization;GO:0030866//cortical actin cytoskeleton organization;GO:0031032//actomyosin structure organization;GO:0032092//positive regulation of protein binding;GO:0051301//cell division;GO:0051924//regulation of calcium ion trans…	--
ENSMUSG00000028909	2.329	2.238	2.547	5.442	4.932	5.865	87	77	94	200	203	209	Ptpru	protein tyrosine phosphatase, receptor type, U [Source:MGI Symbol;Acc:MGI:1321151]	-	-	-	-	GO:0005886//plasma membrane;GO:0005911//cell-cell junction;GO:0016020//membrane;GO:0070161//anchoring junction	GO:0004721//phosphoprotein phosphatase activity;GO:0004725//protein tyrosine phosphatase activity;GO:0005515//protein binding;GO:0008013//beta-catenin binding;GO:0016787//hydrolase activity;GO:0016791//phosphatase activity	GO:0006470//protein dephosphorylation;GO:0007155//cell adhesion;GO:0008285//negative regulation of cell population proliferation;GO:0016311//dephosphorylation;GO:0030154//cell differentiation;GO:0030336//negative regulation of cell migration;GO:0031100//animal organ regeneration;GO:0034109//homotypic cell-cell adhesion;GO:0034394//protein localization to cell surface;GO:0051384//response to gluco…	--
ENSMUSG00000029053	37.027	34.854	35.334	5.194	4.422	6.138	988	888	981	130	121	130	Prkcz	protein kinase C, zeta [Source:MGI Symbol;Acc:MGI:97602]	Human Diseases;Cellular Processes;Environmental Information Processing;Human Diseases;Organismal Systems;Organismal Systems;Cellular Processes;Environmental Information Processing;Human Diseases;Organismal Systems;Organismal Systems;Organismal Systems;Environmental Information Processing;Human Diseases;Human Diseases;Human Diseases	Infectious disease: viral;Transport and catabolism;Signal transduction;Cardiovascular disease;Immune system;Development and regeneration;Cellular community - eukaryotes;Signal transduction;Cardiovascular disease;Endocrine system;Endocrine system;Immune system;Signal transduction;Endocrine and metabolic disease;Endocrine and metabolic disease;Endocrine and metabolic disease	ko05165//Human papillomavirus infection;ko04144//Endocytosis;ko04015//Rap1 signaling pathway;ko05415//Diabetic cardiomyopathy;ko04062//Chemokine signaling pathway;ko04360//Axon guidance;ko04530//Tight junction;ko04390//Hippo signaling pathway;ko05418//Fluid shear stress and atherosclerosis;ko04910//Insulin signaling pathway;ko04926//Relaxin signaling pathway;ko04611//Platelet activation;ko04071//…	K18952;K18952;K18952;K18952;K18952;K18952;K18952;K18952;K18952;K18952;K18952;K18952;K18952;K18952;K18952;K18952	GO:0001725//stress fiber;GO:0005634//nucleus;GO:0005635//nuclear envelope;GO:0005737//cytoplasm;GO:0005768//endosome;GO:0005815//microtubule organizing center;GO:0005829//cytosol;GO:0005886//plasma membrane;GO:0005911//cell-cell junction;GO:0005923//bicellular tight junction;GO:0005938//cell cortex;GO:0014069//postsynaptic density;GO:0016020//membrane;GO:0016324//apical plasma membrane;GO:0016363…	GO:0000166//nucleotide binding;GO:0004672//protein kinase activity;GO:0004674//protein serine/threonine kinase activity;GO:0004697//protein kinase C activity;GO:0004698//calcium-dependent protein kinase C activity;GO:0005515//protein binding;GO:0005524//ATP binding;GO:0015459//potassium channel regulator activity;GO:0016301//kinase activity;GO:0016740//transferase activity;GO:0019901//protein kin…	GO:0000226//microtubule cytoskeleton organization;GO:0001954//positive regulation of cell-matrix adhesion;GO:0006468//protein phosphorylation;GO:0006954//inflammatory response;GO:0007165//signal transduction;GO:0007166//cell surface receptor signaling pathway;GO:0007616//long-term memory;GO:0008104//protein localization;GO:0008284//positive regulation of cell population proliferation;GO:0016310//…	--
[truncated: 597 more rows]
