# Supplementary material for: Inverse and dynamic levels of H3K4me3 and H3K27me3 regulate mouse postnatal dentate gyrus development
Source: Research Square preprint supplement (doi:10.21203/rs.3.rs-5502578/v1), 2024-12-06
Supplement: Supplementary file 4 [file c17e1db95b25d223382ebea6.xlsx]

## Sheet: Sheet1
GENE	chrom	start	end	width	NSCsH3K27.count	NDH3K27.count	NSCsH3K27.log2rpm	NDH3K27.log2rpm	log2FoldChange	pvalue	FDR	NSCsH3K27_vs_NDH3K27_diff	chrom	start	end	width	NSCsH3K4.count	NDH3K4.count	NSCsH3K4.log2rpm	NDH3K4.log2rpm	log2FoldChange	pvalue	FDR	NSCsH3K4_vs_NDH3K4_diff
Shc3	13	51720493	51723015	2523	1.38005	339.626	0.132052	33.1886	-7.85167	1.39832e-22	1.16546e-18	NSCsH3K27_vs_NDH3K27_down	13	51717043	51724486	7444	8725.45	3369.11	269.27	103.972	1.37283	0.00103665	0.00489147	NSCsH3K4_vs_NDH3K4_up
Spry4	18	38732784	38734040	1257	1.38005	152.413	0.132052	14.8951	-6.69644	2.43626e-15	4.7778e-12	NSCsH3K27_vs_NDH3K27_down	18	38727898	38736572	8675	9447.32	2448.44	291.547	75.5597	1.94798	4.72322e-06	4.92857e-05	NSCsH3K4_vs_NDH3K4_up
Chst7	X	19925691	19927296	1606	1.38005	136.873	0.132052	13.3767	-6.54145	1.99104e-14	2.7658e-11	NSCsH3K27_vs_NDH3K27_down	X	19925480	19932601	7122	4436.17	1641.19	136.901	50.6477	1.4345	0.000638167	0.00317249	NSCsH3K4_vs_NDH3K4_up
Id1	2	152577915	152579756	1842	14.8937	243.429	1.45257	23.7888	-4.02276	1.37224e-12	8.1695e-10	NSCsH3K27_vs_NDH3K27_down	2	152576867	152581605	4739	2673.46	922.572	82.5035	28.4709	1.53484	0.000280193	0.0015252	NSCsH3K4_vs_NDH3K4_up
Igfbp2	1	72863587	72865288	1702	16.2451	235.29	1.58462	22.9934	-3.84915	5.1925e-12	2.2778e-09	NSCsH3K27_vs_NDH3K27_down	1	72863159	72867963	4805	4710.02	2139.65	145.352	66.0302	1.13831	0.00633089	0.0243338	NSCsH3K4_vs_NDH3K4_up
Upp1	11	9067908	9069916	2009	20.2994	266.369	1.98078	26.0303	-3.70822	1.18041e-11	4.79925e-09	NSCsH3K27_vs_NDH3K27_down	11	9067608	9071064	3457	1136.33	435.551	35.0672	13.4413	1.38319	0.00114237	0.0053196	NSCsH3K4_vs_NDH3K4_up
Spry4	18	38734772	38735495	724	1.38005	78.4151	0.132052	7.66447	-5.73893	3.37527e-10	7.76055e-08	NSCsH3K27_vs_NDH3K27_down	18	38727898	38736572	8675	9447.32	2448.44	291.547	75.5597	1.94798	4.72322e-06	4.92857e-05	NSCsH3K4_vs_NDH3K4_up
Id3	4	135870374	135872894	2521	51.382	428.423	5.01797	41.8654	-3.05763	4.01873e-10	9.05274e-08	NSCsH3K27_vs_NDH3K27_down	4	135870001	135875817	5817	4822.29	2020.51	148.817	62.3537	1.25494	0.00268131	0.0112858	NSCsH3K4_vs_NDH3K4_up
Tnfaip8	18	50185918	50186585	668	1.38005	68.7954	0.132052	6.72449	-5.55047	2.20844e-09	3.47721e-07	NSCsH3K27_vs_NDH3K27_down	18	50184670	50189542	4873	1637.86	775.799	50.5447	23.9415	1.07793	0.0102547	0.0373374	NSCsH3K4_vs_NDH3K4_up
Tagln2	1	172327343	172329051	1709	37.8679	273.028	3.69745	26.681	-2.84729	1.40629e-08	1.43127e-06	NSCsH3K27_vs_NDH3K27_down	1	172326928	172331708	4781	2474.1	759.596	76.3513	23.4415	1.70343	6.18229e-05	0.000408778	NSCsH3K4_vs_NDH3K4_up
Pcsk4	10	80159080	80159866	787	6.78517	92.4746	0.660259	9.03829	-3.75151	1.41528e-08	1.43417e-06	NSCsH3K27_vs_NDH3K27_down	10	80158146	80160063	1918	576.035	267.81	17.7765	8.26481	1.10455	0.0101621	0.0370268	NSCsH3K4_vs_NDH3K4_up
Fbln2	6	91189593	91190265	673	5.43379	76.9351	0.528207	7.51986	-3.80221	7.14495e-08	4.78325e-06	NSCsH3K27_vs_NDH3K27_down	6	91189338	91193724	4387	1781.61	158.206	54.9807	4.88241	3.49222	4.77742e-14	2.84298e-11	NSCsH3K4_vs_NDH3K4_up
Etv4	11	101676377	101678325	1949	35.165	224.19	3.43335	21.9088	-2.66969	1.26241e-07	7.6384e-06	NSCsH3K27_vs_NDH3K27_down	11	101677560	101677808	249	25.1858	0.948968	0.777113	0.0294121	4.55317	3.36527e-05	0.000242225	NSCsH3K4_vs_NDH3K4_up
Rflna	5	125080534	125081398	865	10.8394	88.0348	1.05641	8.60445	-3.012	1.57586e-06	4.94734e-05	NSCsH3K27_vs_NDH3K27_down	5	125080212	125082455	2244	569.739	247.795	17.5822	7.64715	1.20071	0.00542736	0.021138	NSCsH3K4_vs_NDH3K4_up
Nptx2	5	144482559	144484441	1883	109.492	485.401	10.6962	47.4329	-2.14757	2.58547e-06	7.14472e-05	NSCsH3K27_vs_NDH3K27_down	5	144482236	144486055	3820	2754.25	1232.32	84.9967	38.0299	1.16019	0.0055474	0.0215806	NSCsH3K4_vs_NDH3K4_up
Ciz1	2	32250890	32252037	1148	39.2193	188.671	3.8295	18.4381	-2.26398	6.07418e-06	0.000134735	NSCsH3K27_vs_NDH3K27_down	2	32251014	32251775	762	67.1552	25.729	2.0723	0.794127	1.37949	0.0116011	0.0417402	NSCsH3K4_vs_NDH3K4_up
Mcc	18	44707267	44709386	2120	43.2735	187.191	4.22566	18.2935	-2.11102	1.91823e-05	0.000337834	NSCsH3K27_vs_NDH3K27_down	18	44706706	44707286	581	48.269	1.90206	1.48947	0.0588242	4.57443	1.14875e-07	2.62926e-06	NSCsH3K4_vs_NDH3K4_up
Slc1a5	7	16514777	16517081	2305	74.356	295.227	7.26285	28.8502	-1.98824	2.02403e-05	0.000341531	NSCsH3K27_vs_NDH3K27_down	7	16514652	16518493	3842	1801.54	812.016	55.5959	25.0591	1.14952	0.00622706	0.0239665	NSCsH3K4_vs_NDH3K4_up
Adm	7	110229070	110229338	269	1.38005	29.5765	0.132052	2.89225	-4.33655	2.05601e-05	0.000341531	NSCsH3K27_vs_NDH3K27_down	7	110226275	110230376	4102	2679.75	868.247	82.6977	26.7944	1.62577	0.000126438	0.00076002	NSCsH3K4_vs_NDH3K4_up
Abt1	13	23595727	23597239	1513	45.9764	193.111	4.48976	18.8719	-2.06868	2.62909e-05	0.000426113	NSCsH3K27_vs_NDH3K27_down	13	23595939	23597430	1492	283.298	76.242	8.74252	2.35297	1.89184	3.9149e-05	0.000279007	NSCsH3K4_vs_NDH3K4_up
Rasl12	9	65305699	65306020	322	1.38005	28.8365	0.132052	2.81995	-4.30017	2.88486e-05	0.000456688	NSCsH3K27_vs_NDH3K27_down	9	65305659	65306413	755	108.075	35.2598	3.33511	1.08825	1.61229	0.00130369	0.00597452	NSCsH3K4_vs_NDH3K4_up
Cacna2d3	14	29444315	29447195	2881	64.8961	253.789	6.33848	24.8011	-1.96622	3.32527e-05	0.000513961	NSCsH3K27_vs_NDH3K27_down	14	29446371	29446851	481	55.6136	18.1044	1.71612	0.55883	1.61199	0.00529608	0.0206625	NSCsH3K4_vs_NDH3K4_up
Btn1a1	13	23648018	23650091	2074	48.6792	187.931	4.75386	18.3658	-1.94723	5.87342e-05	0.000798413	NSCsH3K27_vs_NDH3K27_down	13	23647700	23650239	2540	478.456	213.485	14.7651	6.58832	1.16375	0.00711048	0.0269665	NSCsH3K4_vs_NDH3K4_up
Prss16	13	22203486	22206260	2775	112.195	386.984	10.9603	37.8162	-1.78563	7.8833e-05	0.0010175	NSCsH3K27_vs_NDH3K27_down	13	22203084	22207439	4356	1376.6	546.108	42.4822	16.8531	1.33364	0.0016478	0.00732019	NSCsH3K4_vs_NDH3K4_up
Crh	3	19748276	19750181	1906	116.249	399.564	11.3564	39.0454	-1.78059	8.0615e-05	0.00103384	NSCsH3K27_vs_NDH3K27_down	3	19749431	19749679	249	25.1858	4.76134	0.777113	0.147061	2.37154	0.00390492	0.0158111	NSCsH3K4_vs_NDH3K4_up
MIKI	8	112064124	112065004	881	18.948	88.0348	1.84872	8.60445	-2.21142	8.16835e-05	0.00103384	NSCsH3K27_vs_NDH3K27_down	8	112064160	112065363	1204	283.298	118.177	8.74252	3.6471	1.26041	0.0047436	0.0187859	NSCsH3K4_vs_NDH3K4_up
GM31740	7	79193163	79193700	538	6.78517	46.5961	0.660259	4.5553	-2.76484	0.000103342	0.00126993	NSCsH3K27_vs_NDH3K27_down	7	79192023	79195120	3098	618.004	195.376	19.0716	6.02949	1.66069	0.000140128	0.000828038	NSCsH3K4_vs_NDH3K4_up
4930557F10ik	13	23483357	23483848	492	5.43379	41.4162	0.528207	4.04915	-2.91105	0.000151266	0.00174973	NSCsH3K27_vs_NDH3K27_down	13	23482129	23484592	2464	1019.86	335.478	31.4731	10.3531	1.6037	0.00018617	0.00106194	NSCsH3K4_vs_NDH3K4_up
COL1A1	11	94828354	94829998	1645	54.0848	187.191	5.28207	18.2935	-1.78989	0.000216085	0.00231493	NSCsH3K27_vs_NDH3K27_down	11	94827984	94828974	991	131.159	58.1336	4.04746	1.79414	1.172	0.013974	0.0492229	NSCsH3K4_vs_NDH3K4_up
Cdc42	15	78726428	78728780	2353	160.846	490.58	15.7142	47.9391	-1.60842	0.00028954	0.00294838	NSCsH3K27_vs_NDH3K27_down	15	78726231	78730551	4321	2058.61	775.799	63.529	23.9415	1.40776	0.000865048	0.0041554	NSCsH3K4_vs_NDH3K4_up
Adm	7	110224927	110228776	3850	216.253	642.275	21.1283	62.7619	-1.57018	0.000323732	0.00324111	NSCsH3K27_vs_NDH3K27_down	7	110226275	110230376	4102	2679.75	868.247	82.6977	26.7944	1.62577	0.000126438	0.00076002	NSCsH3K4_vs_NDH3K4_up
prss56	1	87112864	87114956	2093	155.44	460.242	15.1859	44.9745	-1.56564	0.000405357	0.00388339	NSCsH3K27_vs_NDH3K27_down	1	87113600	87113848	249	30.432	4.76134	0.939011	0.147061	2.64333	0.000883969	0.00420634	NSCsH3K4_vs_NDH3K4_up
Gm33085	2	18035765	18037324	1560	78.4102	230.85	7.659	22.5596	-1.55706	0.000828899	0.00691769	NSCsH3K27_vs_NDH3K27_down	2	18036211	18037225	1015	162.636	57.1805	5.01885	1.76473	1.50587	0.00151578	0.00681161	NSCsH3K4_vs_NDH3K4_up
Arc	15	74543519	74543978	460	5.43379	34.7564	0.528207	3.3984	-2.65907	0.000860935	0.00708884	NSCsH3K27_vs_NDH3K27_down	15	74541604	74544655	3052	872.968	417.443	26.9399	12.8825	1.06411	0.0119674	0.0428484	NSCsH3K4_vs_NDH3K4_up
Kcnk5	14	20230121	20231901	1781	85.1672	246.389	8.31926	24.078	-1.53186	0.000929141	0.00743915	NSCsH3K27_vs_NDH3K27_down	14	20228705	20232407	3703	1445.85	653.805	44.6192	20.1767	1.14482	0.00657563	0.0251312	NSCsH3K4_vs_NDH3K4_up
Tafa4	6	97035565	97037692	2128	86.5186	247.129	8.45131	24.1503	-1.5135	0.0009999	0.00794084	NSCsH3K27_vs_NDH3K27_down	6	97035549	97037543	1995	380.877	173.456	11.7538	5.35301	1.13414	0.00919193	0.0339009	NSCsH3K4_vs_NDH3K4_up
Egr2	10	67373479	67376861	3383	312.203	792.49	30.504	77.4401	-1.34375	0.00178825	0.0124025	NSCsH3K27_vs_NDH3K27_down	10	67376861	67377274	414	37.7766	0.948968	1.16567	0.0294121	5.13576	4.77852e-07	8.03494e-06	NSCsH3K4_vs_NDH3K4_up
Atp4a	7	30414515	30417262	2748	116.249	291.528	11.3564	28.4887	-1.32599	0.00331864	0.0197325	NSCsH3K27_vs_NDH3K27_down	7	30417085	30417529	445	83.943	35.2598	2.59038	1.08825	1.2482	0.0139994	0.0492951	NSCsH3K4_vs_NDH3K4_up
Lif	11	4215214	4217636	2423	109.492	269.328	10.6962	26.3195	-1.2981	0.00410602	0.023143	NSCsH3K27_vs_NDH3K27_down	11	4215314	4215826	513	40.9243	10.4798	1.26281	0.323533	1.95196	0.00186626	0.0081785	NSCsH3K4_vs_NDH3K4_up
Inf2	12	112553869	112556632	2764	224.362	528.319	21.9206	51.6267	-1.23539	0.00446033	0.0248211	NSCsH3K27_vs_NDH3K27_down	12	112556305	112556939	635	62.9583	13.3391	1.94278	0.41177	2.22764	0.000138064	0.000816799	NSCsH3K4_vs_NDH3K4_up
Notch3	17	32380847	32382411	1565	139.223	330.746	13.6013	32.3209	-1.248	0.00519065	0.0277726	NSCsH3K27_vs_NDH3K27_down	17	32382077	32382613	537	47.2197	2.85516	1.45709	0.0882364	3.98772	7.29517e-07	1.13628e-05	NSCsH3K4_vs_NDH3K4_up
Zfp688	7	127021793	127022206	414	9.48799	35.4964	0.924362	3.4707	-1.89543	0.00561466	0.0293121	NSCsH3K27_vs_NDH3K27_down	7	127022056	127022314	259	44.072	6.66751	1.35995	0.205885	2.70097	4.98313e-05	0.000340505	NSCsH3K4_vs_NDH3K4_up
C2cd4c	10	79447844	79450358	2515	254.092	578.637	24.8257	56.5435	-1.18715	0.00611253	0.0312325	NSCsH3K27_vs_NDH3K27_down	10	79448121	79449151	1031	91.2876	31.4475	2.81703	0.9706	1.53348	0.00267699	0.01127	NSCsH3K4_vs_NDH3K4_up
Adgra2	8	27575641	27578927	3287	258.147	586.777	25.2219	57.3389	-1.18446	0.00619816	0.0315626	NSCsH3K27_vs_NDH3K27_down	8	27577739	27578041	303	35.6781	1.90206	1.10091	0.0588242	4.13965	5.52293e-06	5.451e-05	NSCsH3K4_vs_NDH3K4_up
Clip1	5	123819714	123819977	264	8.13658	32.5364	0.79231	3.18148	-1.98973	0.00648527	0.0325084	NSCsH3K27_vs_NDH3K27_down	5	123819869	123820154	286	34.6289	8.57367	1.06853	0.264709	1.99749	0.00281747	0.0118025	NSCsH3K4_vs_NDH3K4_up
Ap1s3	1	79648238	79650846	2609	252.741	569.018	24.6937	55.6036	-1.17066	0.00674379	0.0336121	NSCsH3K27_vs_NDH3K27_down	1	79650665	79650938	274	41.9736	3.80825	1.29519	0.117648	3.4184	1.04861e-05	9.47591e-05	NSCsH3K4_vs_NDH3K4_up
kif9	9	110306952	110307524	573	16.2451	50.296	1.58462	4.91683	-1.62642	0.0069849	0.0343341	NSCsH3K27_vs_NDH3K27_down	9	110307234	110307724	491	45.1213	11.4329	1.39233	0.352945	1.9683	0.00140429	0.00638638	NSCsH3K4_vs_NDH3K4_up
Meis2	2	115690902	115691370	469	9.48799	36.2363	0.924362	3.54301	-1.92508	0.00749892	0.0362254	NSCsH3K27_vs_NDH3K27_down	2	115684761	115691593	6833	1201.38	417.443	37.0747	12.8825	1.52474	0.000354126	0.0018737	NSCsH3K4_vs_NDH3K4_up
Hs3st5	10	36383060	36385222	2163	178.414	398.824	17.4308	38.9731	-1.1603	0.00830137	0.0388598	NSCsH3K27_vs_NDH3K27_down	10	36385039	36385439	401	44.072	15.2452	1.35995	0.470594	1.52331	0.0108508	0.0392885	NSCsH3K4_vs_NDH3K4_up
Elf2	3	51265489	51267322	1834	154.089	344.806	15.0539	33.6947	-1.16177	0.0084285	0.0393114	NSCsH3K27_vs_NDH3K27_down	3	51264851	51267042	2192	651.58	246.842	20.1078	7.61774	1.39987	0.00120556	0.00555629	NSCsH3K4_vs_NDH3K4_up
GM53997	13	22101372	22103984	2613	195.982	431.383	19.1475	42.1546	-1.13805	0.00894623	0.0411587	NSCsH3K27_vs_NDH3K27_down	13	22101226	22103986	2761	486.85	93.3974	15.0242	2.88239	2.38039	1.86096e-07	3.79607e-06	NSCsH3K4_vs_NDH3K4_up
Ptpn18	1	34510451	34513125	2675	143.278	317.427	13.9975	31.0194	-1.14734	0.00997048	0.0444452	NSCsH3K27_vs_NDH3K27_down	1	34512937	34513185	249	29.3827	6.66751	0.906631	0.205885	2.11805	0.00529072	0.0206575	NSCsH3K4_vs_NDH3K4_up
Lmo7	14	101966221	101968667	2447	204.091	441.742	19.9398	43.1669	-1.11382	0.0103974	0.0458333	NSCsH3K27_vs_NDH3K27_down	14	101968589	101968914	326	36.7274	4.76134	1.13329	0.147061	2.91362	0.000159961	0.000930291	NSCsH3K4_vs_NDH3K4_up
Gli1	10	127174899	127178772	3874	92.5833	369.583	9.05356	36.234	-1.62742	0.00803214	0.0326579	NSCsH3K27_vs_NDH3K27_down	10	127175066	127177797	2731	128.889	79.0909	3.97301	2.32083	1.63146	0.0140199	0.019138	NSCsH3K4_vs_NDH3K4_up
CDK6	5	3385422	3396775	11354	40.6923	227.231	2.0206	23.9089	-4.54353	0.00724629	0.0354322	NSCsH3K27_vs_NDH3K27_down	5	3391067	3394891	3824	861.376	115.188	26.7651	3.59329	2.56576	0.00907163	0.0492951	NSCsH3K4_vs_NDH3K4_up
Fgd4	16	16375620	16376006	387	39.2193	9.59668	3.8295	0.939982	2.01303	0.00202491	0.0136463	NSCsH3K27_vs_NDH3K27_up	16	16375858	16378406	2549	344.154	1088.41	10.6205	33.5886	-1.66076	0.000110875	0.000676519	NSCsH3K4_vs_NDH3K4_down
Grin1	2	25207365	25207769	405	37.8679	9.59668	3.69745	0.939982	1.96256	0.00321704	0.0191694	NSCsH3K27_vs_NDH3K27_up	2	25207702	25209650	1949	327.366	785.329	10.1025	24.2356	-1.2621	0.00319016	0.0131219	NSCsH3K4_vs_NDH3K4_down
GM17315	17	79664198	79665246	1049	74.356	28.8365	7.26285	2.81995	1.36122	0.0093986	0.0426823	NSCsH3K27_vs_NDH3K27_up	17	79660614	79664307	3694	2092.18	4644.33	64.5651	143.325	-1.15042	0.00581672	0.0225502	NSCsH3K4_vs_NDH3K4_down
